# Supplementary material
Source: publisher figshare collection journal article supplement (https://gsajournals.figshare.com/ndownloader/files/28547733)
Supplement: Supplementary file 1 [file 28547733]

## Sheet: Read Me
Supplemental Table 4. RNA-Seq differential genes, greater than 2-fold.
Each tab is a table representing the comparison of strains of two genotypes.
Triplicate samples for each genotype were averaged to obtain the numbers in these tables.
Only protein-coding genes with a base mean >30 and a log2 fold change of greater than +1 or less than -1 were included.
Definition of columns in the tables:
ID = Systematic name
Gene name = Common name
Biotype = Type of gene (protein-coding vs. tRNA etc.)
Chromosome = Location
Description = Information about the gene
Base Mean = Average corrected count value across all samples
Log2 FC = Log2 fold change between the two strains (first strain listed relative to second strain listed)
Adj p-value = Adjusted p-value, using the Benjamini Hochberg correction
Cluster = Cluster number from Fig 5B

## Sheet: S649F_a vs. WT_a
tup1(S649F) a vs. WT a Comparison
Genes with >2-fold change; protein coding only
ID	Gene Name	Biotype	Chromosome	Description	Base Mean	Log2 FC	Adj p-value	Cluster
YJR150C	DAN1	protein_coding	X	Cell wall mannoprotein; has similarity to Tir1p, Tir2p, Tir3p, and Tir4p; expressed under anaerobic conditions, completely repressed during aerobic growth	189.456	6.89808	1.3134e-26	2
YAL063C	FLO9	protein_coding	I	Lectin-like protein with similarity to Flo1p; thought to be expressed and involved in flocculation	1094.48	6.59413	0	2
YIL099W	SGA1	protein_coding	IX	Intracellular sporulation-specific glucoamylase; involved in glycogen degradation; induced during starvation of a/a diploids late in sporulation, but dispensable for sporulation	478.205	5.91901	1.57998e-159	2
YML058W-A	HUG1	protein_coding	XIII	Ribonucleotide reductase inhibitor; intrinsically disordered protein that binds to and inhibits Rnr2p; involved in the Mec1p-mediated checkpoint pathway; transcription is induced by genotoxic stress and by activation of the Rad53p pathway; protein abundance increases in response to DNA replication stress	444.17	5.79305	1.72199e-149	2
YER011W	TIR1	protein_coding	V	Cell wall mannoprotein; expression is downregulated at acidic pH and induced by cold shock and anaerobiosis; abundance is increased in cells cultured without shaking; member of the Srp1p/Tip1p family of serine-alanine-rich proteins	1137.89	5.78746	0	2
YEL070W	DSF1	protein_coding	V	Mannitol dehydrogenase; deletion suppresses mutation of mpt5; DSF1 has a paralog, MAN2, that arose from a segmental duplication	181.339	5.52752	8.69271e-75	2
YMR317W		protein_coding	XIII	Putative protein of unknown function; has some similarity to sialidase from Trypanosoma; YMR317W is not an essential gene	313.42	5.47733	1.43477e-144	2
YFL014W	HSP12	protein_coding	VI	Plasma membrane protein involved in maintaining membrane organization; involved in maintaining organization during stress conditions; induced by heat shock, oxidative stress, osmostress, stationary phase, glucose depletion, oleate and alcohol; protein abundance increased in response to DNA replication stress and dietary restriction; regulated by the HOG and Ras-Pka pathways; required for dietary …	669.751	5.43373	4.04381e-100	2
YJR047C	ANB1	protein_coding	X	Translation elongation factor eIF-5A; previously thought to function in translation initiation; undergoes an essential hypusination modification; expressed under anaerobic conditions; ANB1 has a paralog, HYP2, that arose from the whole genome duplication; human EIF5A complements the inviability of the yeast hyp2 anb1 double null mutant	586.13	5.34583	2.478e-236	2
YGR292W	MAL12	protein_coding	VII	Maltase (alpha-D-glucosidase); inducible protein involved in maltose catabolism; encoded in the MAL1 complex locus; hydrolyzes the disaccharides maltose, turanose, maltotriose, and sucrose	167.429	5.05635	7.37696e-60	2
YGL158W	RCK1	protein_coding	VII	Protein kinase involved in oxidative stress response; promotes pseudohyphal growth via activation of Ubp3p phosphorylation; identified as suppressor of S. pombe cell cycle checkpoint mutations; RCK1 has a paralog, RCK2, that arose from the whole genome duplication	239.522	5.02126	3.92989e-101	2
YIL066C	RNR3	protein_coding	IX	Minor isoform of large subunit of ribonucleotide-diphosphate reductase; the RNR complex catalyzes rate-limiting step in dNTP synthesis, regulated by DNA replication and DNA damage checkpoint pathways via localization of small subunits; RNR3 has a paralog, RNR1, that arose from the whole genome duplication	1186.82	4.97866	0	2
YKL163W	PIR3	protein_coding	XI	O-glycosylated covalently-bound cell wall protein; required for cell wall stability; expression is cell cycle regulated, peaking in M/G1 and also subject to regulation by the cell integrity pathway; coding sequence contains length polymorphisms in different strains; PIR3 has a paralog, HSP150, that arose from the whole genome duplication	1633.22	4.92782	0	2
YMR279C		protein_coding	XIII	Putative boron transporter involved in boron efflux and resistance; overexpression mutant but not null mutant displays boron tolerance phenotype; identified as a heat-induced gene in a high-throughout screen; YMR279C is not an essential gene; YMR279C has a paralog, ATR1, that arose from the whole genome duplication	225.497	4.89287	1.45912e-112	2
YAR050W	FLO1	protein_coding	I	Lectin-like protein involved in flocculation; cell wall protein that binds mannose chains on the surface of other cells, confers floc-forming ability that is chymotrypsin sensitive and heat resistant; important for co-flocculation with other yeasts, mediating interaction with specific species; FLO1 has a paralog, FLO5, that arose from a segmental duplication	753.527	4.80397	2.77978e-209	2
YPR192W	AQY1	protein_coding	XVI	Spore-specific water channel; mediates the transport of water across cell membranes, developmentally controlled; may play a role in spore maturation, probably by allowing water outflow, may be involved in freeze tolerance	133.81	4.79465	2.22721e-71	2
YFL053W	DAK2	protein_coding	VI	Dihydroxyacetone kinase; required for detoxification of dihydroxyacetone (DHA); involved in stress adaptation	127.062	4.79364	9.77965e-35	2
YGR066C		protein_coding	VII	Putative protein of unknown function	66.449	4.79305	8.89209e-24	1
YJL116C	NCA3	protein_coding	X	Protein involved in mitochondrion organization; functions with Nca2p to regulate mitochondrial expression of subunits 6 (Atp6p) and 8 (Atp8p) of the Fo-F1 ATP synthase; SWAT-GFP, seamless-GFP and mCherry fusion proteins localize to the vacuole; member of the SUN family; expression induced in cells treated with the mycotoxin patulin; NCA3 has a paralog, UTH1, that arose from the whole genome dupli…	216.881	4.74361	3.15827e-125	2
YER150W	SPI1	protein_coding	V	GPI-anchored cell wall protein involved in weak acid resistance; basal expression requires Msn2p/Msn4p; expression is induced under conditions of stress and during the diauxic shift; SPI1 has a paralog, SED1, that arose from the whole genome duplication	436.857	4.68208	1.57247e-170	2
YGR138C	TPO2	protein_coding	VII	Polyamine transporter of the major facilitator superfamily; member of the 12-spanner drug:H(+) antiporter DHA1 family; specific for spermine; localizes to the plasma membrane; transcription of TPO2 is regulated by Haa1p; TPO2 has a paralog, TPO3, that arose from the whole genome duplication	1421.18	4.55579	0	2
YJL052W	TDH1	protein_coding	X	Glyceraldehyde-3-phosphate dehydrogenase (GAPDH), isozyme 1; involved in glycolysis and gluconeogenesis; tetramer that catalyzes the reaction of glyceraldehyde-3-phosphate to 1,3 bis-phosphoglycerate; detected in the cytoplasm and cell wall; protein abundance increases in response to DNA replication stress; GAPDH-derived antimicrobial peptides secreted by S. cerevisiae are active against a wide v…	2058.5	4.40323	7.64295e-255	2
YOR178C	GAC1	protein_coding	XV	Regulatory subunit for Glc7p type-1 protein phosphatase (PP1); tethers Glc7p to Gsy2p glycogen synthase, binds Hsf1p heat shock transcription factor, required for induction of some HSF-regulated genes under heat shock; GAC1 has a paralog, PIG1, that arose from the whole genome duplication	772.706	4.39452	5.30549e-146	2
YBR117C	TKL2	protein_coding	II	Transketolase; catalyzes conversion of xylulose-5-phosphate and ribose-5-phosphate to sedoheptulose-7-phosphate and glyceraldehyde-3-phosphate in the pentose phosphate pathway; needed for synthesis of aromatic amino acids; TKL2 has a paralog, TKL1, that arose from the whole genome duplication	213.678	4.32564	9.07719e-44	2
YOL052C-A	DDR2	protein_coding	XV	Multi-stress response protein; expression is activated by a variety of xenobiotic agents and environmental or physiological stresses; DDR2 has a paralog, HOR7, that arose from the whole genome duplication	205.321	4.2773	1.30094e-36	2
YDL085W	NDE2	protein_coding	IV	Mitochondrial external NADH dehydrogenase; catalyzes the oxidation of cytosolic NADH; Nde1p and Nde2p are involved in providing the cytosolic NADH to the mitochondrial respiratory chain; NDE2 has a paralog, NDE1, that arose from the whole genome duplication	112.454	4.24291	1.53406e-49	1
YOL157C	IMA2	protein_coding	XV	Isomaltase (alpha-1,6-glucosidase/alpha-methylglucosidase); preferred specificity for isomaltose, alpha-methylglucoside, and palatinose, but also exhibits alpha-1,2 glucosidase activity on sucrose and kojibiose, and can cleave the 1,3-alpha linkage of nigerose and turanose and the alpha-1,5 linkage of leucrose in vitro; not required for isomaltose utilization, but Ima2p overexpression allows the …	190.063	4.21677	5.77895e-101	2
YOL084W	PHM7	protein_coding	XV	Protein of unknown function; expression is regulated by phosphate levels; green fluorescent protein (GFP)-fusion protein localizes to the cell periphery and vacuole; protein abundance increases in response to DNA replication stress	471.402	4.17646	2.81445e-80	2
YMR206W		protein_coding	XIII	Putative protein of unknown function; not an essential gene; YMR206W has a paralog, YNR014W, that arose from the whole genome duplication	59.9281	4.13992	5.81686e-32	1
YOR382W	FIT2	protein_coding	XV	Mannoprotein that is incorporated into the cell wall; incorporated via a glycosylphosphatidylinositol (GPI) anchor; involved in the retention of siderophore-iron in the cell wall	763.108	4.12126	2.33942e-48	2
YPL171C	OYE3	protein_coding	XVI	Conserved NADPH oxidoreductase containing flavin mononucleotide (FMN); homologous to Oye2p with different ligand binding and catalytic properties; has potential roles in oxidative stress response and programmed cell death	136.95	4.06846	9.47986e-71	1
YIL101C	XBP1	protein_coding	IX	Transcriptional repressor; binds promoter sequences of cyclin genes, CYS3, and SMF2; not expressed during log phase of growth, but induced by stress or starvation during mitosis, and late in meiosis; represses 15% of all yeast genes as cells transition to quiescence; important for maintaining G1 arrest and for longevity of quiescent cells; member of Swi4p/Mbp1p family; phosphorylated by Cdc28p; r…	257.241	4.04788	4.19383e-93	1
YLL055W	YCT1	protein_coding	XII	High-affinity cysteine-specific transporter; has similarity to the Dal5p family of transporters; green fluorescent protein (GFP)-fusion protein localizes to the endoplasmic reticulum; YCT1 is not an essential gene	751.715	4.0236	0	2
YIL011W	TIR3	protein_coding	IX	Cell wall mannoprotein; member of Srp1p/Tip1p family of serine-alanine-rich proteins; expressed under anaerobic conditions and required for anaerobic growth; TIR3 has a paralog, TIR2, that arose from the whole genome duplication	686.734	4.01319	0	2
YBR201C-A		protein_coding	II	Putative protein of unknown function	324.953	3.99005	1.8369e-164	2
YGR088W	CTT1	protein_coding	VII	Cytosolic catalase T; has a role in protection from oxidative damage by hydrogen peroxide	369.26	3.96011	1.44879e-64	2
YBR301W	PAU24	protein_coding	II	Cell wall mannoprotein; has similarity to Tir1p, Tir2p, Tir3p, and Tir4p; member of the seripauperin multigene family encoded mainly in subtelomeric regions; expressed under anaerobic conditions, completely repressed during aerobic growth	54.2974	3.93736	3.84046e-34	1
YAL064C-A	TDA8	protein_coding	I	Putative protein of unknown function; null mutant is sensitive to expression of the top1-T722A allele; not an essential gene	54.7347	3.92161	5.42758e-31	1
YNL194C		protein_coding	XIV	Integral membrane protein; required for sporulation and plasma membrane sphingolipid content; similar to SUR7; GFP-fusion protein is induced in response to the DNA-damaging agent MMS; GFP-fusion protein is more abundant at MCCs (membrane compartment occupied by Can1) in the presence of glycerol and oleate; YNL194C has a paralog, FMP45, that arose from the whole genome duplication	115.134	3.87295	1.4583e-18	2
YPR015C		protein_coding	XVI	Putative zinc finger transcription factor; binds DNA in sequence-specific manner; overexpression causes a cell cycle delay or arrest	96.6785	3.85775	7.26445e-51	1
YJL214W	HXT8	protein_coding	X	Protein of unknown function with similarity to hexose transporters; expression is induced by low levels of glucose and repressed by high levels of glucose	233.972	3.80824	8.71845e-109	2
YOR010C	TIR2	protein_coding	XV	Putative cell wall mannoprotein; member of the Srp1p/Tip1p family of serine-alanine-rich proteins; transcription is induced by cold shock and anaerobiosis; TIR2 has a paralog, TIR3, that arose from the whole genome duplication	204.565	3.73779	1.36046e-124	2
YBR072W	HSP26	protein_coding	II	Small heat shock protein (sHSP) with chaperone activity; forms hollow, sphere-shaped oligomers that suppress unfolded proteins aggregation; long-lived protein that is preferentially retained in mother cells and forms cytoplasmic foci; oligomer activation requires heat-induced conformational change; also has mRNA binding activity	236.538	3.70353	7.78418e-33	2
YDL222C	FMP45	protein_coding	IV	Integral membrane protein localized to mitochondria; required for sporulation and maintaining sphingolipid content; similar to SUR7; FMP45 has a paralog, YNL194C, that arose from the whole genome duplication	392.345	3.65622	3.81749e-35	2
YCR098C	GIT1	protein_coding	III	Plasma membrane permease; mediates uptake of glycerophosphoinositol and glycerophosphocholine as sources of the nutrients inositol and phosphate; expression and transport rate are regulated by phosphate and inositol availability	1593.45	3.61857	2.07516e-114	2
YGR052W	FMP48	protein_coding	VII	Putative protein of unknown function; the authentic, non-tagged protein is detected in highly purified mitochondria in high-throughput studies; induced by treatment with 8-methoxypsoralen and UVA irradiation	84.998	3.60077	4.79918e-55	1
YBR054W	YRO2	protein_coding	II	Protein with a putative role in response to acid stress; null mutant is sensitive to acetic acid; transcription is regulated by Haa1p and induced in the presence of acetic acid; protein observed in plasma membrane foci in the presence of acetic acid; the authentic, non-tagged protein is detected in a phosphorylated state in highly purified mitochondria in high-throughput studies	776.119	3.55886	1.33945e-182	2
YOR134W	BAG7	protein_coding	XV	Rho GTPase activating protein (RhoGAP); stimulates the intrinsic GTPase activity of Rho1p, which plays a bud growth by regulating actin cytoskeleton organization and cell wall biosynthesis, resulting in the downregulation of Rho1p; structurally and functionally related to Sac7p; BAG7 has a paralog, SAC7, that arose from the whole genome duplication	82.5735	3.55374	1.53349e-36	1
YGR144W	THI4	protein_coding	VII	Thiazole synthase; abundant protein involved in the formation of the thiazole moiety of thiamine during thiamine biosynthesis; acts more as a co-substrate rather than an enzyme by providing the sulphur source for thiazole formation; undergoes a single turnover only; required for mitochondrial genome stability in response to DNA damaging agents	89.5409	3.55115	1.38088e-47	1
YDL039C	PRM7	protein_coding	IV	Pheromone-regulated protein; predicted to have one transmembrane segment; promoter contains Gcn4p binding elements; in W303 strain one continuous open reading frame comprising of YDL037C, the intergenic region and YDL039C encodes the IMI1	464.422	3.50931	1.11677e-57	1
YIL160C	POT1	protein_coding	IX	3-ketoacyl-CoA thiolase with broad chain length specificity; cleaves 3-ketoacyl-CoA into acyl-CoA and acetyl-CoA during beta-oxidation of fatty acids	58.2297	3.50555	1.44038e-18	1
YGR248W	SOL4	protein_coding	VII	6-phosphogluconolactonase; protein abundance increases in response to DNA replication stress; SOL4 has a paralog, SOL3, that arose from the whole genome duplication	64.1721	3.47818	3.98255e-29	1
YGR213C	RTA1	protein_coding	VII	Protein involved in 7-aminocholesterol resistance; has seven potential membrane-spanning regions; expression is induced under both low-heme and low-oxygen conditions; member of the fungal lipid-translocating exporter (LTE) family of protein; RTA1 has a paralog, YLR046C, that arose from the whole genome duplication	166.253	3.47051	3.94345e-64	1
YER096W	SHC1	protein_coding	V	Sporulation-specific activator of Chs3p (chitin synthase III); required for the synthesis of the chitosan layer of ascospores; transcriptionally induced at alkaline pH; SHC1 has a paralog, SKT5, that arose from the whole genome duplication	373.381	3.46878	5.02134e-166	2
YDR403W	DIT1	protein_coding	IV	Sporulation-specific enzyme required for spore wall maturation; involved in the production of a soluble LL-dityrosine-containing precursor of the spore wall; transcripts accumulate at the time of prospore enclosure	170.874	3.45351	1.01287e-81	1
YOR389W		protein_coding	XV	Putative protein of unknown function; expression regulated by copper levels	370.484	3.42081	1.09535e-205	1
YIR019C		protein_coding	IX	GPI-anchored cell surface glycoprotein (flocculin); required for pseudohyphal and invasive growth, flocculation, and biofilm formation; major determinant of colony morphology; transcription regulated by the MAPK pathway (Ste12p and Tec1p) and the cAMP pathway (Flo8p); required for formation of fibrous interconnections between cells of a wild strain; role in co-flocculation with other yeast specie…	160.765	3.41495	2.4274e-64	1
YDL214C	PRR2	protein_coding	IV	Serine/threonine protein kinase; inhibits pheromone induced signalling downstream of MAPK, possibly at the level of the Ste12p transcription factor; mutant has increased aneuploidy tolerance; PRR2 has a paralog, NPR1, that arose from the whole genome duplication	143.678	3.38176	6.64273e-91	1
YDL037C	BSC1	protein_coding	IV	Protein of unconfirmed function; similar to cell surface flocculin Flo11p; ORF exhibits genomic organization compatible with a translational readthrough-dependent mode of expression; in W303 strain one continuous open reading frame comprising of YDL037C, the intergenic region and YDL039C encodes the gene IMI1	323.285	3.37796	3.89797e-64	1
YMR120C	ADE17	protein_coding	XIII	Enzyme of 'de novo' purine biosynthesis; contains both 5-aminoimidazole-4-carboxamide ribonucleotide transformylase and inosine monophosphate cyclohydrolase activities; ADE17 has a paralog, ADE16, that arose from the whole genome duplication; ade16 ade17 mutants require adenine and histidine	1388.65	3.35518	0	2
YLL053C		protein_coding	XII	Putative protein; in the Sigma 1278B strain background YLL053C is contiguous with AQY2 which encodes an aquaporin	213.952	3.28945	4.04539e-70	1
YBR067C	TIP1	protein_coding	II	Major cell wall mannoprotein with possible lipase activity; transcription is induced by heat- and cold-shock; member of the Srp1p/Tip1p family of serine-alanine-rich proteins	2023.45	3.24277	0	2
YKL217W	JEN1	protein_coding	XI	Monocarboxylate/proton symporter of the plasma membrane; transport activity is dependent on the pH gradient across the membrane; mediates high-affinity uptake of carbon sources lactate, pyuvate, and acetate, and also of the micronutrient selenite, whose structure mimics that of monocarboxylates; expression and localization are tightly regulated, with transcription repression, mRNA degradation, an…	252.359	3.22075	7.10884e-20	1
YNL270C	ALP1	protein_coding	XIV	Arginine transporter; expression is normally very low and it is unclear what conditions would induce significant expression; ALP1 has a paralog, CAN1, that arose from the whole genome duplication	119.175	3.21546	1.8769e-71	1
YLR327C	TMA10	protein_coding	XII	Protein of unknown function that associates with ribosomes; protein abundance increases in response to DNA replication stress; TMA10 has a paralog, STF2, that arose from the whole genome duplication	311.962	3.19679	6.47367e-61	1
YIL113W	SDP1	protein_coding	IX	Stress-inducible dual-specificity MAP kinase phosphatase; negatively regulates Slt2p MAP kinase by direct dephosphorylation, diffuse localization under normal conditions shifts to punctate localization after heat shock; SDP1 has a paralog, MSG5, that arose from the whole genome duplication	67.4292	3.17515	9.65804e-39	1
YNR034W-A	EGO4	protein_coding	XIV	Protein of unknown function; expression is regulated by Msn2p/Msn4p; YNR034W-A has a paralog, YCR075W-A, that arose from the whole genome duplication	70.6093	3.1293	6.83785e-16	1
YIL013C	PDR11	protein_coding	IX	ATP-binding cassette (ABC) transporter; multidrug transporter involved in multiple drug resistance; mediates sterol uptake when sterol biosynthesis is compromised; regulated by Pdr1p; required for anaerobic growth; PDR11 has a paralog, AUS1, that arose from the whole genome duplication	923.147	3.10283	2.40488e-252	1
YML054C	CYB2	protein_coding	XIII	Cytochrome b2 (L-lactate cytochrome-c oxidoreductase); component of the mitochondrial intermembrane space, required for lactate utilization; expression is repressed by glucose and anaerobic conditions	205.536	3.10217	1.09779e-80	1
YDR119W-A	COX26	protein_coding	IV	Stabilizes or regulates formation of respiratory chain supercomplexes composed of Complex III (ubiquinol-cytochrome c reductase) and Complex IV (cytochrome c oxidase)	135.888	3.10155	1.21624e-55	1
YDL048C	STP4	protein_coding	IV	Protein containing a Kruppel-type zinc-finger domain; similar to Stp1p, Stp2p; predicted transcription factor; relative distribution to the nucleus increases upon DNA replication stress; STP4 has a paralog, STP3, that arose from the whole genome duplication	353.784	3.0751	6.82876e-100	1
YPL189W	GUP2	protein_coding	XVI	Probable membrane protein; possible role in proton symport of glycerol; member of the MBOAT family of putative membrane-bound O-acyltransferases; homolog of the mammalian Hedgehog pathway modulator HHAT; GUP2 has a paralog, GUP1, that arose from the whole genome duplication	169.735	3.05029	1.69179e-103	1
YEL067C		protein_coding	V	Putative protein of unknown function; the authentic, non-tagged protein is detected in highly purified mitochondria in high-throughput studies	97.1833	3.04103	1.31657e-54	1
YCL026C-B	HBN1	protein_coding	III	Protein of unknown function; similar to bacterial nitroreductases; green fluorescent protein (GFP)-fusion protein localizes to the cytoplasm and nucleus; protein becomes insoluble upon intracellular iron depletion; protein abundance increases in response to DNA replication stress	219.889	3.03695	3.5357e-94	1
YLR267W	BOP2	protein_coding	XII	Protein of unknown function	166.162	3.01852	6.25827e-55	1
YPL277C		protein_coding	XVI	Putative protein of unknown function; localized to the membranes; gene expression regulated by copper levels	167.158	3.00889	7.46967e-78	1
YDR533C	HSP31	protein_coding	IV	Methylglyoxalase that converts methylglyoxal to D-lactate; involved in oxidative stress resistance, diauxic shift, and stationary phase survival; has similarity to E. coli Hsp31 and C. albicans Glx3p; member of the DJ-1/ThiJ/PfpI superfamily, which includes human DJ-1 involved in Parkinson's disease and cancer; exists as a dimer and contains a putative metal-binding site; protein abundance increa…	731.2	2.97757	1.12838e-157	1
YML131W		protein_coding	XIII	Protein of unknown function; similar to medium chain dehydrogenase/reductases; expression induced by stresses including osmotic shock, DNA damaging agents, and other chemicals; GFP-fusion protein localizes to the cytoplasm; protein abundance increases in response to DNA replication stress	891.826	2.9706	5.82726e-226	1
YLR237W	THI7	protein_coding	XII	Plasma membrane transporter responsible for the uptake of thiamine; contributes to uptake of 5-aminoimidazole-4-carboxamide-1-beta-D-ribofuranoside (acadesine); member of the major facilitator superfamily of transporters; mutation of human ortholog causes thiamine-responsive megaloblastic anemia	1580.84	2.9315	1.66613e-250	1
YHR096C	HXT5	protein_coding	VIII	Hexose transporter with moderate affinity for glucose; induced in the presence of non-fermentable carbon sources, induced by a decrease in growth rate, contains an extended N-terminal domain relative to other HXTs; HXT5 has a paralog, HXT3, that arose from the whole genome duplication	82.7857	2.92246	1.41998e-15	1
YDR343C	HXT6	protein_coding	IV	High-affinity glucose transporter; member of the major facilitator superfamily, nearly identical to Hxt7p, expressed at high basal levels relative to other HXTs, repression of expression by high glucose requires SNF3; HXT6 has a paralog, HXT1, that arose from the whole genome duplication	134.993	2.91548	4.12006e-14	1
YPR160W	GPH1	protein_coding	XVI	Glycogen phosphorylase required for the mobilization of glycogen; non-essential; regulated by cyclic AMP-mediated phosphorylation; phosphorylation by Cdc28p may coordinately regulate carbohydrate metabolism and the cell cycle; expression is regulated by stress-response elements and by the HOG MAP kinase pathway	3229.52	2.91278	1.43534e-126	2
YJL216C	IMA5	protein_coding	X	Alpha-glucosidase; specificity for isomaltose, maltose, and palatinose, but not alpha-methylglucoside; most distant member of the IMA isomaltase family, but with similar catalytic properties as Ima1p and Ima2p; not required for isomaltose utilization, but Ima5p overexpression allows the ima1 null mutant to grow on isomaltose; can cleave alpha-1,3 linkage of nigerose and turanose and alpha-1,5 lin…	201.986	2.90682	1.67039e-75	1
YLL052C	AQY2	protein_coding	XII	Water channel that mediates water transport across cell membranes; only expressed in proliferating cells; controlled by osmotic signals; may be involved in freeze tolerance; disrupted by a stop codon in many S. cerevisiae strains	165.5	2.89271	1.80379e-57	1
YPL230W	USV1	protein_coding	XVI	Putative transcription factor containing a C2H2 zinc finger; mutation affects transcriptional regulation of genes involved in growth on non-fermentable carbon sources, response to salt stress and cell wall biosynthesis; USV1 has a paralog, RGM1, that arose from the whole genome duplication	74.6359	2.8572	8.01676e-28	1
YMR173W	DDR48	protein_coding	XIII	DNA damage-responsive protein; expression is increased in response to heat-shock stress or treatments that produce DNA lesions; contains multiple repeats of the amino acid sequence NNNDSYGS; protein abundance increases in response to DNA replication stress	1470.62	2.83657	1.36819e-289	1
YNR014W		protein_coding	XIV	Putative protein of unknown function; expression is cell-cycle regulated, Azf1p-dependent, and heat-inducible; YNR014W has a paralog, YMR206W, that arose from the whole genome duplication	129.213	2.8307	7.70823e-59	1
YDR034W-B		protein_coding	IV	Predicted tail-anchored plasma membrane protein; contains conserved CYSTM module; related proteins in other organisms may be involved in response to stress; N- and C-terminal fusion proteins localize to the cell periphery; YDR034W-B has a paralog, YBR056W-A, that arose from the whole genome duplication	79.64	2.82628	1.18176e-20	1
YGR287C	IMA1	protein_coding	VII	Major isomaltase (alpha-1,6-glucosidase/alpha-methylglucosidase); required for isomaltose utilization; preferred specificity for isomaltose, alpha-methylglucoside, and palatinose, but also exhibits alpha-1,2 glucosidase activity on sucrose and kojibiose, and can cleave the 1,3-alpha linkage of nigerose and turanose and the alpha-1,5 linkage of leucrose in vitro; member of the IMA isomaltase family	217.003	2.79577	5.49321e-87	1
YKL093W	MBR1	protein_coding	XI	Protein involved in mitochondrial functions and stress response; overexpression suppresses growth defects of hap2, hap3, and hap4 mutants; MBR1 has a paralog, ISF1, that arose from the whole genome duplication	164.674	2.79438	1.86433e-47	1
YBL043W	ECM13	protein_coding	II	Non-essential protein of unknown function; induced by treatment with 8-methoxypsoralen and UVA irradiation; ECM13 has a paralog, YJR115W, that arose from the whole genome duplication	122.819	2.7914	2.28732e-20	6
YOR384W	FRE5	protein_coding	XV	Putative ferric reductase with similarity to Fre2p; expression induced by low iron levels; the authentic, non-tagged protein is detected in highly purified mitochondria in high-throughput studies	91.2033	2.7889	1.51232e-13	1
YMR169C	ALD3	protein_coding	XIII	Cytoplasmic aldehyde dehydrogenase; involved in beta-alanine synthesis; uses NAD+ as the preferred coenzyme; very similar to Ald2p; expression is induced by stress and repressed by glucose	137.845	2.78746	7.89191e-15	1
YGR043C	NQM1	protein_coding	VII	Transaldolase of unknown function; transcription is repressed by Mot1p and induced by alpha-factor and during diauxic shift; NQM1 has a paralog, TAL1, that arose from the whole genome duplication	65.1332	2.78265	3.87522e-25	1
YGR249W	MGA1	protein_coding	VII	Protein similar to heat shock transcription factor; multicopy suppressor of pseudohyphal growth defects of ammonium permease mutants	97.141	2.77862	1.28152e-46	1
YDR342C	HXT7	protein_coding	IV	High-affinity glucose transporter; member of the major facilitator superfamily, nearly identical to Hxt6p, expressed at high basal levels relative to other HXTs, expression repressed by high glucose levels; HXT7 has a paralog, HXT4, that arose from the whole genome duplication	430.824	2.77338	1.16172e-42	1
YKL187C	FAT3	protein_coding	XI	Protein required for fatty acid uptake; protein abundance increases in cortical patches in response to oleate exposure; the authentic, non-tagged protein is detected in a phosphorylated state in highly purified mitochondria in high-throughput studies; FAT3 has a paralog, YLR413W, that arose from the whole genome duplication	476.653	2.76877	6.86787e-105	1
YGR243W	MPC3	protein_coding	VII	Highly conserved subunit of the mitochondrial pyruvate carrier (MPC); expressed during growth on nonfermentable carbon sources, and heterodimerizes with Mpc1p to form the respiratory isoform of MPC; MPC localizes to the mitochondrial inner membrane and mediates pyruvate uptake; MPC3 paralog, MPC2, heterodimerizes with Mpc1p to form the fermentative MPC isoform; protein abundance increases in resp…	104.615	2.75604	2.03368e-49	1
YJL218W		protein_coding	X	Putative acetyltransferase; similar to bacterial galactoside O-acetyltransferases; induced by oleate in an OAF1/PIP2-dependent manner; promoter contains an oleate response element consensus sequence; non-essential gene	69.2583	2.75004	8.88806e-34	1
YKR097W	PCK1	protein_coding	XI	Phosphoenolpyruvate carboxykinase; key enzyme in gluconeogenesis, catalyzes early reaction in carbohydrate biosynthesis, glucose represses transcription and accelerates mRNA degradation, regulated by Mcm1p and Cat8p, located in the cytosol	186.343	2.66922	2.13361e-37	1
YHR087W	RTC3	protein_coding	VIII	Protein of unknown function involved in RNA metabolism; has structural similarity to SBDS, the human protein mutated in Shwachman-Diamond Syndrome (the yeast SBDS ortholog = SDO1); null mutation suppresses cdc13-1 temperature sensitivity; protein abundance increases in response to DNA replication stress	106.385	2.6481	3.43851e-34	1
YPL054W	LEE1	protein_coding	XVI	Zinc-finger protein of unknown function	117.746	2.64159	3.06539e-37	1
YOR383C	FIT3	protein_coding	XV	Mannoprotein that is incorporated into the cell wall; incorporated via a glycosylphosphatidylinositol (GPI) anchor; involved in the retention of siderophore-iron in the cell wall	1452.38	2.61889	1.1231e-33	1
YML128C	MSC1	protein_coding	XIII	Protein of unknown function; mutant is defective in directing meiotic recombination events to homologous chromatids; the authentic, non-tagged protein is detected in highly purified mitochondria and is phosphorylated	430.188	2.58961	2.00117e-40	1
YOR032C	HMS1	protein_coding	XV	bHLH protein with similarity to myc-family transcription factors; overexpression confers hyperfilamentous growth and suppresses the pseudohyphal filamentation defect of a diploid mep1 mep2 homozygous null mutant	153.249	2.58413	1.28149e-62	1
YBR182C	SMP1	protein_coding	II	MADS-box transcription factor involved in osmotic stress response; SMP1 has a paralog, RLM1, that arose from the whole genome duplication	256.495	2.57449	9.47141e-97	1
YEL039C	CYC7	protein_coding	V	Cytochrome c isoform 2, expressed under hypoxic conditions; also known as iso-2-cytochrome c; electron carrier of the mitochondrial intermembrane space that transfers electrons from ubiquinone-cytochrome c oxidoreductase to cytochrome c oxidase during cellular respiration; protein abundance increases in response to DNA replication stress; CYC7 has a paralog, CYC1, that arose from the whole genome…	139.566	2.5518	4.5054e-29	1
YAL061W	BDH2	protein_coding	I	Putative medium-chain alcohol dehydrogenase with similarity to BDH1; transcription induced by constitutively active PDR1 and PDR3	183.763	2.53786	6.30467e-41	1
YHR022C		protein_coding	VIII	Putative protein of unknown function; YHR022C is not an essential gene	154.424	2.53377	6.03931e-59	1
YER054C	GIP2	protein_coding	V	Putative regulatory subunit of protein phosphatase Glc7p; involved in glycogen metabolism; contains a conserved motif (GVNK motif) that is also found in Gac1p, Pig1p, and Pig2p; GIP2 has a paralog, PIG2, that arose from the whole genome duplication	114.459	2.4932	2.49746e-39	1
YMR081C	ISF1	protein_coding	XIII	Serine-rich, hydrophilic protein; overexpression suppresses growth defects of hap2, hap3, and hap4 mutants; expression is under glucose control; cotranscribed with NAM7 in a cyp1 mutant; ISF1 has a paralog, MBR1, that arose from the whole genome duplication	71.5091	2.47979	4.9506e-26	1
YJL026W	RNR2	protein_coding	X	Ribonucleotide-diphosphate reductase (RNR), small subunit; the RNR complex catalyzes the rate-limiting step in dNTP synthesis and is regulated by DNA replication and DNA damage checkpoint pathways via localization of the small subunits; RNR2 has a paralog, RNR4, that arose from the whole genome duplication	12689.3	2.45488	1.38689e-236	1
YDR216W	ADR1	protein_coding	IV	Carbon source-responsive zinc-finger transcription factor; required for transcription of the glucose-repressed gene ADH2, of peroxisomal protein genes, and of genes required for ethanol, glycerol, and fatty acid utilization	1566.94	2.44889	0	1
YIL120W	QDR1	protein_coding	IX	Multidrug transporter of the major facilitator superfamily; member of the 12-spanner drug:H(+) antiporter DHA1 family; involved in spore wall assembly; sequence similarity to DTR1 and QDR3, and the triple mutant dtr1 qdr1 qdr3 exhibits reduced dityrosine fluorescence relative to the single mutants; required for resistance to quinidine, ketoconazole, fluconazole, and barban; QDR1 has a paralog, AQ…	162.983	2.43279	6.65802e-67	1
YEL011W	GLC3	protein_coding	V	Glycogen branching enzyme, involved in glycogen accumulation; green fluorescent protein (GFP)-fusion protein localizes to the cytoplasm in a punctate pattern; relocalizes from nucleus to cytoplasmic foci upon DNA replication stress; glycogen accumulation defect of the null mutant is functionally complemented by human GBE1, which is associated with glycogen storage disease	1041.32	2.42526	2.44584e-83	1
YDL204W	RTN2	protein_coding	IV	Reticulon protein; involved in nuclear pore assembly and maintenance of tubular ER morphology; promotes membrane curvature; regulates the ER asymmetry-induced inheritance block during ER stress; role in ER-derived peroxisomal biogenesis; interacts with Sec6p, Yip3p, and Sbh1p; less abundant than RTN1; member of RTNLA (reticulon-like A) subfamily; protein increases in abundance and relocalizes to …	432.826	2.3666	1.57711e-14	1
YNL237W	YTP1	protein_coding	XIV	Probable type-III integral membrane protein of unknown function; has regions of similarity to mitochondrial electron transport proteins	173.55	2.35579	6.62194e-31	1
YNL195C		protein_coding	XIV	Protein of unknown function; shares a promoter with YNL194C; the authentic, non-tagged protein is detected in highly purified mitochondria in high-throughput studies; YNL195C has a paralog, HBT1, that arose from the whole genome duplication	89.4468	2.35195	4.28516e-28	1
YGL146C	RRT6	protein_coding	VII	Putative protein of unknown function; non-essential gene identified in a screen for mutants with increased levels of rDNA transcription; contains two putative transmembrane spans, but no significant homology to other known proteins	67.2948	2.3304	3.4292e-32	6
YMR181C		protein_coding	XIII	Protein of unknown function; mRNA transcribed as part of a bicistronic transcript with a predicted transcriptional repressor RGM1/YMR182C; mRNA is destroyed by nonsense-mediated decay (NMD); not an essential gene; YMR181C has a paralog, YPL229W, that arose from the whole genome duplication	381.363	2.32877	1.54656e-72	1
YJL105W	SET4	protein_coding	X	Protein of unknown function, contains a SET domain; SET4 has a paralog, SET3, that arose from the whole genome duplication	62.864	2.32221	1.89281e-26	6
YDR043C	NRG1	protein_coding	IV	Transcriptional repressor; recruits the Cyc8p-Tup1p complex to promoters; mediates glucose repression and negatively regulates a variety of processes including filamentous growth and alkaline pH response; activated in stochastic pulses of nuclear localization in response to low glucose	306.46	2.31447	2.81388e-54	1
YJL079C	PRY1	protein_coding	X	Sterol binding protein involved in the export of acetylated sterols; secreted glycoprotein and member of the CAP protein superfamily (cysteine-rich secretory proteins (CRISP), antigen 5, and pathogenesis related 1 proteins); sterol export function is redundant with that of PRY2; may be involved in detoxification of hydrophobic compounds; PRY1 has a paralog, PRY2, that arose from the whole genome …	836.986	2.31083	8.83606e-155	1
YOR049C	RSB1	protein_coding	XV	Putative sphingoid long-chain base (LCB) efflux transporter; integral membrane transporter that localizes to the plasma membrane and may transport long chain bases (LCBs) from the cytoplasmic side toward the extracytoplasmic side of the membrane; role in glycerophospholipid translocation; suppressor of the sphingoid LCB sensitivity of an LCB-lyase mutation	254.355	2.24348	6.51842e-40	1
YOL055C	THI20	protein_coding	XV	Trifunctional enzyme of thiamine biosynthesis, degradation and salvage; has hydroxymethylpyrimidine (HMP) kinase, HMP-phosphate (HMP-P) kinase and thiaminase activities; member of a gene family with THI21 and THI22; HMP and HMP-P kinase activity redundant with Thi21p	427.123	2.23396	5.42228e-97	1
YDL223C	HBT1	protein_coding	IV	Shmoo tip protein, substrate of Hub1p ubiquitin-like protein; mutants are defective for mating projection formation, thereby implicating Hbt1p in polarized cell morphogenesis; HBT1 has a paralog, YNL195C, that arose from the whole genome duplication	488.384	2.23219	1.42185e-62	1
YIR035C		protein_coding	IX	Putative cytoplasmic short-chain dehydrogenase/reductase	597.586	2.21802	3.7199e-141	1
YNR002C	ATO2	protein_coding	XIV	Putative transmembrane protein involved in export of ammonia; ammonia is a starvation signal that promotes cell death in aging colonies; phosphorylated in mitochondria; member of the TC 9.B.33 YaaH family; homolog of Y. lipolytica Gpr1p; ATO2 has a paralog, ADY2, that arose from the whole genome duplication	69.6697	2.2104	1.36807e-09	1
YPR030W	CSR2	protein_coding	XVI	Nuclear ubiquitin protein ligase binding protein; may regulate utilization of nonfermentable carbon sources and endocytosis of plasma membrane proteins; overproduction suppresses chs5 spa2 lethality at high temp; ubiquitinated by Rsp5p, deubiquitinated by Ubp2p; CSR2 has a paralog, ECM21, that arose from the whole genome duplication	297.574	2.19869	2.73583e-64	1
YBR240C	THI2	protein_coding	II	Transcriptional activator of thiamine biosynthetic genes; interacts with regulatory factor Thi3p to control expression of thiamine biosynthetic genes with respect to thiamine availability; acts together with Pdc2p to respond to thiaminediphosphate demand, possibly as related to carbon source availability; zinc finger protein of the Zn(II)2Cys6 type	94.8115	2.16154	2.4041e-26	6
YBR033W	EDS1	protein_coding	II	Putative zinc cluster protein, predicted to be a transcription factor; not an essential gene; EDS1 has a paralog, RGT1, that arose from the whole genome duplication	70.9514	2.15537	4.01311e-24	6
YIL014C-A	YIL014C-A	protein_coding	IX	Putative protein of unknown function	59.3239	2.1377	1.21099e-19	6
YHL044W		protein_coding	VIII	Putative integral membrane protein; member of DUP240 gene family; green fluorescent protein (GFP)-fusion protein localizes to the plasma membrane in a punctate pattern	111.671	2.12636	2.12214e-34	1
YPL017C	IRC15	protein_coding	XVI	Microtubule associated protein; regulates microtubule dynamics; required for accurate meiotic chromosome segregation; null mutant displays large budded cells due to delayed mitotic progression, increased levels of spontaneous Rad52 foci; IRC15 has a paralog, LPD1, that arose from the whole genome duplication	74.6919	2.11506	5.56572e-24	6
YOR161C	PNS1	protein_coding	XV	Protein of unknown function; has similarity to Torpedo californica tCTL1p, which is postulated to be a choline transporter, neither null mutation nor overexpression affects choline transport	601.851	2.11354	9.10257e-54	1
YBR183W	YPC1	protein_coding	II	Alkaline ceramidase; also has reverse (CoA-independent) ceramide synthase activity; catalyzes both breakdown and synthesis of phytoceramide; overexpression confers fumonisin B1 resistance; YPC1 has a paralog, YDC1, that arose from the whole genome duplication	345.75	2.10974	7.93834e-59	1
YLR149C		protein_coding	XII	Protein of unknown function; overexpression causes a cell cycle delay or arrest; null mutation results in a decrease in plasma membrane electron transport; YLR149C is not an essential gene; protein abundance increases in response to DNA replication stress	305.521	2.10932	3.61251e-45	1
YIL162W	SUC2	protein_coding	IX	Invertase; sucrose hydrolyzing enzyme; a secreted, glycosylated form is regulated by glucose repression, and an intracellular, nonglycosylated enzyme is produced constitutively	1941.59	2.10834	8.43715e-151	1
YDR406W	PDR15	protein_coding	IV	Plasma membrane ATP binding cassette (ABC) transporter; multidrug transporter and general stress response factor implicated in cellular detoxification; regulated by Pdr1p, Pdr3p and Pdr8p; promoter contains a PDR responsive element; PDR15 has a paralog, PDR5, that arose from the whole genome duplication	1246.6	2.08495	4.24565e-120	1
YPR157W	TDA6	protein_coding	XVI	Putative protein of unknown function; induced by treatment with 8-methoxypsoralen and UVA irradiation; null mutant is sensitive to expression of the top1-T722A allele; SWAT-GFP and mCherry fusion proteins localize to the cell periphery and vacuole; TDA6 has a paralog, VPS62, that arose from the whole genome duplication	88.3232	2.08381	2.97225e-33	6
YMR196W		protein_coding	XIII	Putative protein of unknown function; green fluorescent protein (GFP)-fusion protein localizes to the cytoplasm; YMR196W is not an essential gene	973.186	2.07551	1.35996e-143	1
YJL089W	SIP4	protein_coding	X	C6 zinc cluster transcriptional activator; binds to the carbon source-responsive element (CSRE) of gluconeogenic genes; involved in the positive regulation of gluconeogenesis; regulated by Snf1p protein kinase; localized to the nucleus	107.964	2.06769	6.77297e-18	6
YDR259C	YAP6	protein_coding	IV	Basic leucine zipper (bZIP) transcription factor; physically interacts with the Tup1-Cyc8 complex and recruits Tup1p to its targets; overexpression increases sodium and lithium tolerance; computational analysis suggests a role in regulation of expression of genes involved in carbohydrate metabolism; YAP6 has a paralog, CIN5, that arose from the whole genome duplication	211.98	2.0622	2.03188e-44	1
YDL079C	MRK1	protein_coding	IV	Glycogen synthase kinase 3 (GSK-3) homolog; one of four GSK-3 homologs in S. cerevisiae that function to activate Msn2p-dependent transcription of stress responsive genes and that function in protein degradation; MRK1 has a paralog, RIM11, that arose from the whole genome duplication	106.813	2.04625	4.55865e-35	6
YGL096W	TOS8	protein_coding	VII	Homeodomain-containing protein and putative transcription factor; found associated with chromatin; target of SBF transcription factor; induced during meiosis and under cell-damaging conditions; TOS8 has a paralog, CUP9, that arose from the whole genome duplication	60.4567	2.02549	1.45865e-21	6
YKL096W	CWP1	protein_coding	XI	Cell wall mannoprotein that localizes to birth scars of daughter cells; linked to a beta-1,3- and beta-1,6-glucan heteropolymer through a phosphodiester bond; required for propionic acid resistance	5176.71	2.01749	5.40613e-138	1
YGL255W	ZRT1	protein_coding	VII	High-affinity zinc transporter of the plasma membrane; responsible for the majority of zinc uptake; transcription is induced under low-zinc conditions by the Zap1p transcription factor	1502.3	2.00332	2.60962e-151	1
YIR038C	GTT1	protein_coding	IX	ER associated glutathione S-transferase; capable of homodimerization; glutathione transferase for Yvc1p vacuolar cation channel; expression induced during the diauxic shift and throughout stationary phase; functional overlap with Gtt2p, Grx1p, and Grx2p	672.798	1.98813	2.9618e-96	1
YMR182C	RGM1	protein_coding	XIII	Putative zinc finger DNA binding transcription factor; contains two N-terminal C2H2 zinc fingers and C-terminal proline rich domain; overproduction impairs cell growth and induces expression of genes involved in monosaccharide catabolism and aldehyde metabolism; regulates expression of of Y' telomeric elements and subtelomeric COS genes; relocalizes to the cytosol in response to hypoxia; RGM1 has…	94.1129	1.98379	6.2431e-25	6
YGR180C	RNR4	protein_coding	VII	Ribonucleotide-diphosphate reductase (RNR) small subunit; the RNR complex catalyzes the rate-limiting step in dNTP synthesis and is regulated by DNA replication and DNA damage checkpoint pathways via localization of the small subunits; relocalizes from nucleus to cytoplasm upon DNA replication stress; RNR4 has a paralog, RNR2, that arose from the whole genome duplication	7531.23	1.98242	7.17555e-242	1
YNL274C	GOR1	protein_coding	XIV	Glyoxylate reductase; null mutation results in increased biomass after diauxic shift; the authentic, non-tagged protein is detected in highly purified mitochondria in high-throughput studies; protein abundance increases in response to DNA replication stress	286.496	1.982	2.59298e-59	1
YOR062C	YOR062C	protein_coding	XV	Protein of unknown function; similar to Reg1p; expression regulated by glucose and Rgt1p; GFP-fusion protein is induced in response to the DNA-damaging agent MMS; YOR062C has a paralog, YKR075C, that arose from the whole genome duplication	88.1019	1.98004	2.19317e-25	6
YOR028C	CIN5	protein_coding	XV	Basic leucine zipper (bZIP) transcription factor of the yAP-1 family; physically interacts with the Tup1-Cyc8 complex and recruits Tup1p to its targets; mediates pleiotropic drug resistance and salt tolerance; nuclearly localized under oxidative stress and sequestered in the cytoplasm by Lot6p under reducing conditions; CIN5 has a paralog, YAP6, that arose from the whole genome duplication	209.354	1.97939	4.78954e-54	6
YER158C		protein_coding	V	Protein of unknown function; potentially phosphorylated by Cdc28p; YER158C has a paralog, AFR1, that arose from the whole genome duplication	303.694	1.97892	1.73548e-79	1
YKR102W	FLO10	protein_coding	XI	Member of the FLO family of cell wall flocculation proteins; not expressed in most lab strains; overproduction induces flocculation that can be inhibited by mannose, sucrose, or glucose; overproduction also promotes haploid invasive growth and diploid filamentous growth	592.958	1.96589	2.99833e-100	1
YMR095C	SNO1	protein_coding	XIII	Protein of unconfirmed function; involved in pyridoxine metabolism; expression is induced during stationary phase; forms a putative glutamine amidotransferase complex with Snz1p, with Sno1p serving as the glutaminase	156.472	1.9549	1.02062e-08	5
YDR018C		protein_coding	IV	Probable membrane protein with three predicted transmembrane domains; similar to C. elegans F55A11.5 and maize 1-acyl-glycerol-3-phosphate acyltransferase; YDR018C has a paralog, CST26, that arose from the whole genome duplication	61.1029	1.95465	1.00582e-13	6
YGL156W	AMS1	protein_coding	VII	Vacuolar alpha mannosidase; involved in free oligosaccharide (fOS) degradation; delivered to the vacuole in a novel pathway separate from the secretory pathway	560.372	1.95094	7.74344e-81	1
YHL024W	RIM4	protein_coding	VIII	Putative RNA-binding protein; required for the expression of early and middle sporulation genes	262.838	1.94884	4.09841e-40	1
YCL040W	GLK1	protein_coding	III	Glucokinase; catalyzes the phosphorylation of glucose at C6 in the first irreversible step of glucose metabolism; one of three glucose phosphorylating enzymes; expression regulated by non-fermentable carbon sources; GLK1 has a paralog, EMI2, that arose from the whole genome duplication	3200.19	1.94752	9.63582e-110	1
YBR147W	RTC2	protein_coding	II	Putative vacuolar membrane transporter for cationic amino acids; likely contributes to amino acid homeostasis by exporting cationic amino acids from the vacuole; positive regulation by Lys14p suggests that lysine may be the primary substrate; member of the PQ-loop family, with seven transmembrane domains; similar to mammalian PQLC2 vacuolar transporter; RTC2 has a paralog, YPQ1, that arose from t…	57.5465	1.94646	7.05072e-14	5
YPR005C	HAL1	protein_coding	XVI	Cytoplasmic protein involved in halotolerance; decreases intracellular Na+ (via Ena1p) and increases intracellular K+ by decreasing efflux; expression repressed by Ssn6p-Tup1p and Sko1p and induced by NaCl, KCl, and sorbitol through Gcn4p	317.116	1.92456	1.94275e-55	1
YHR211W	FLO5	protein_coding	VIII	Lectin-like cell wall protein (flocculin) involved in flocculation; binds mannose chains on the surface of other cells, confers floc-forming ability that is chymotrypsin resistant but heat labile; important for co-flocculation with other yeasts, mediating interaction with specific species; FLO5 has a paralog, FLO1, that arose from a segmental duplication	827.97	1.91756	4.23569e-70	1
YER062C		protein_coding	V	DL-glycerol-3-phosphate phosphatase involved in glycerol biosynthesis; also known as glycerol-1-phosphatase; induced in response to hyperosmotic or oxidative stress, and during diauxic shift; GPP2 has a paralog, GPP1, that arose from the whole genome duplication	663.446	1.91009	9.93017e-119	1
YOR374W	ALD4	protein_coding	XV	Mitochondrial aldehyde dehydrogenase; required for growth on ethanol and conversion of acetaldehyde to acetate; phosphorylated; activity is K+ dependent; utilizes NADP+ or NAD+ equally as coenzymes; expression is glucose repressed; can substitute for cytosolic NADP-dependent aldehyde dehydrogenase when directed to the cytosol; human homolog ALDH2 can complement yeast ald4 mutant	2996.17	1.89819	7.92344e-92	1
YGR067C		protein_coding	VII	Putative protein of unknown function; contains a zinc finger motif similar to that of Adr1p	101.453	1.89302	4.19094e-24	6
YPL134C	ODC1	protein_coding	XVI	Mitochondrial inner membrane transporter; 2-oxodicarboxylate transporter, exports 2-oxoadipate and 2-oxoglutarate from the mitochondrial matrix to the cytosol for lysine and glutamate biosynthesis and lysine catabolism; suppresses, in multicopy, an fmc1 null mutation; ODC1 has a paralog, ODC2, that arose from the whole genome duplication	216.116	1.8791	4.58392e-55	6
YOR348C	PUT4	protein_coding	XV	Proline permease; required for high-affinity transport of proline; also transports the toxic proline analog azetidine-2-carboxylate (AzC); PUT4 transcription is repressed in ammonia-grown cells	984.879	1.8764	3.26737e-44	1
YIL121W	QDR2	protein_coding	IX	Plasma membrane transporter of the major facilitator superfamily; member of the 12-spanner drug:H(+) antiporter DHA1 family; exports copper; has broad substrate specificity and can transport many mono- and divalent cations; transports a variety of drugs and is required for resistance to quinidine, barban, cisplatin, and bleomycin; contributes to potassium homeostasis; expression is regulated by c…	480.949	1.86887	2.88348e-77	1
YGR032W	GSC2	protein_coding	VII	Catalytic subunit of 1,3-beta-glucan synthase; involved in formation of the inner layer of the spore wall; activity positively regulated by Rho1p and negatively by Smk1p; GSC2 has a paralog, FKS1, that arose from the whole genome duplication	6339.13	1.86453	2.98269e-160	1
YML042W	CAT2	protein_coding	XIII	Carnitine acetyl-CoA transferase; present in both mitochondria and peroxisomes; transfers activated acetyl groups to carnitine to form acetylcarnitine which can be shuttled across membranes	144.326	1.86373	2.59744e-23	6
YLR178C	TFS1	protein_coding	XII	Inhibitor of carboxypeptidase Y (Prc1p), and Ras GAP (Ira2p); phosphatidylethanolamine-binding protein (PEBP) family member and ortholog of hPEBP1/RKIP, a natural metastasis suppressor; targets to vacuolar membranes during stationary phase; acetylated by NatB N-terminal acetyltransferase; protein abundance increases in response to DNA replication stress	262.232	1.8485	1.91269e-35	1
YIL136W	OM45	protein_coding	IX	Mitochondrial outer membrane protein of unknown function; major constituent of the outer membrane, extending into the intermembrane space; interacts with porin (Por1p) and with Om14p; imported via the presequence pathway involving the TOM and TIM23 complexes, then assembled in the outer membrane by Mim1p; protein abundance increases in response to DNA replication stress	330.637	1.84479	1.61531e-18	6
YDL024C	DIA3	protein_coding	IV	Protein of unknown function; involved in invasive and pseudohyphal growth	69.4792	1.84424	6.59169e-14	6
YHR210C		protein_coding	VIII	Putative aldose 1-epimerase superfamily protein; non-essential gene; highly expressed under anaeorbic conditions	66.9237	1.84338	1.75948e-23	6
YJL217W	REE1	protein_coding	X	Cytoplasmic protein involved in the regulation of enolase (ENO1); mRNA expression is induced by calcium shortage, copper deficiency (via Mac1p) and the presence of galactose (via Gal4p); mRNA expression is also regulated by the cell cycle	1017.04	1.84168	4.27322e-118	1
YHL028W	WSC4	protein_coding	VIII	Endoplasmic reticulum (ER) membrane protein; involved in the translocation of soluble secretory proteins and insertion of membrane proteins into the ER membrane; may also have a role in the stress response but has only partial functional overlap with WSC1-3	291.309	1.83886	5.9859e-39	6
YOL083W	ATG34	protein_coding	XV	Receptor protein involved in selective autophagy during starvation; specifically involved in the transport of cargo protein alpha-mannosidase (Ams1p); Atg19p paralog	71.2416	1.8378	1.84432e-18	6
YIL055C		protein_coding	IX	Putative protein of unknown function	249.926	1.82743	1.09809e-56	6
YBR105C	VID24	protein_coding	II	GID Complex regulatory subunit; binds GID Complex in response to glucose through interactions with complex member Vid28p; regulates fructose-1,6-bisphosphatase (FBPase) targeting to the vacuole; promotes proteasome-dependent catabolite degradation of FBPase; peripheral membrane protein located at Vid (vacuole import and degradation) vesicles	756.799	1.82574	4.3177e-85	6
YPL248C	GAL4	protein_coding	XVI	DNA-binding transcription factor required for activating GAL genes; responds to galactose; repressed by Gal80p and activated by Gal3p	166.018	1.81573	1.55009e-38	6
YGR286C	BIO2	protein_coding	VII	Biotin synthase; catalyzes the conversion of dethiobiotin to biotin, which is the last step of the biotin biosynthesis pathway; complements E. coli bioB mutant	551.378	1.80624	2.56958e-82	1
YPR184W	GDB1	protein_coding	XVI	Glycogen debranching enzyme; contains glucanotranferase and alpha-1,6-amyloglucosidase activities; required for glycogen degradation; phosphorylated in mitochondria; activity is inhibited by Igd1p; protein abundance increases in response to DNA replication stress	2049.75	1.79672	2.09061e-56	1
YOR173W	DCS2	protein_coding	XV	m(7)GpppX pyrophosphatase regulator; non-essential, stress induced regulatory protein; modulates m7G-oligoribonucleotide metabolism; inhibits Dcs1p; regulated by Msn2p, Msn4p, and the Ras-cAMP-cAPK signaling pathway; mutant has increased aneuploidy tolerance; DCS2 has a paralog, DCS1, that arose from the whole genome duplication	109.948	1.79041	8.31408e-17	6
YKR058W	GLG1	protein_coding	XI	Glycogenin glucosyltransferase; self-glucosylating initiator of glycogen synthesis, also glucosylates n-dodecyl-beta-D-maltoside; SWAT-GFP and mCherry fusion proteins localize to the cell periphery and vacuole respectively; similar to mammalian glycogenin; GLG1 has a paralog, GLG2, that arose from the whole genome duplication	181.288	1.78564	2.66677e-47	6
YOL151W	GRE2	protein_coding	XV	3-methylbutanal reductase and NADPH-dependent methylglyoxal reductase; stress induced (osmotic, ionic, oxidative, heat shock and heavy metals); regulated by the HOG pathway; restores resistance to glycolaldehyde by coupling reduction of glycolaldehyde to ethylene glycol and oxidation of NADPH to NADP+; protein abundance increases in response to DNA replication stress; methylglyoxal reductase (NAD…	1051.75	1.78421	1.31459e-160	1
YDR277C	MTH1	protein_coding	IV	Negative regulator of the glucose-sensing signal transduction pathway; required for repression of transcription by Rgt1p; interacts with Rgt1p and the Snf3p and Rgt2p glucose sensors; phosphorylated by Yck1p, triggering Mth1p degradation; MTH1 has a paralog, STD1, that arose from the whole genome duplication	347.203	1.76738	2.28459e-51	1
YNL015W	PBI2	protein_coding	XIV	Cytosolic inhibitor of vacuolar proteinase B (PRB1); required for efficient vacuole inheritance; with thioredoxin forms protein complex LMA1, which assists in priming SNARE molecules and promotes vacuole fusion; protein abundance increases in response to DNA replication stress	387.531	1.76544	9.83992e-35	1
YGR023W	MTL1	protein_coding	VII	Putative plasma membrane sensor; involved in cell integrity signaling and stress response during glucose starvation and oxidative stress; has structural and functional similarity to Mid2p; MTL1 has a paralog, MID2, that arose from the whole genome duplication	71.7336	1.76304	3.38402e-14	6
YLR121C	YPS3	protein_coding	XII	Aspartic protease; member of the yapsin family of proteases involved in cell wall growth and maintenance; attached to the plasma membrane via a glycosylphosphatidylinositol (GPI) anchor	1674.01	1.75945	4.37393e-110	1
YNL144C		protein_coding	XIV	Putative protein of unknown function; non-tagged protein is detected in highly purified mitochondria in high-throughput studies; contains a PH domain and binds phosphatidylinositols and phosphatidylethanolamine in a large-scale study; YNL144C has a paralog, YHR131C, that arose from the whole genome duplication	171.961	1.75807	2.13732e-47	6
YCR020C	PET18	protein_coding	III	Protein of unknown function; has weak similarity to proteins involved in thiamin metabolism; expression is induced in the absence of thiamin	60.3605	1.75532	3.87247e-15	6
YNL208W		protein_coding	XIV	Protein of unknown function; may interact with ribosomes, based on co-purification experiments; authentic, non-tagged protein is detected in purified mitochondria in high-throughput studies; potential orthologs found in other fungi	2005.11	1.74131	1.24381e-130	1
YDL049C	KNH1	protein_coding	IV	Protein with similarity to Kre9p; Kre9p is involved in cell wall beta 1,6-glucan synthesis; overproduction suppresses growth defects of a kre9 null mutant; required for propionic acid resistance	69.9286	1.73733	1.16733e-20	6
YDR453C	TSA2	protein_coding	IV	Stress inducible cytoplasmic thioredoxin peroxidase; cooperates with Tsa1p in the removal of reactive oxygen, nitrogen and sulfur species using thioredoxin as hydrogen donor; deletion enhances the mutator phenotype of tsa1 mutants; protein abundance increases in response to DNA replication stress; TSA2 has a paralog, TSA1, that arose from the whole genome duplication	94.3076	1.73305	6.72333e-18	6
YJR116W	TDA4	protein_coding	X	Putative protein of unknown function; null mutant is sensitive to expression of the top1-T722A allele	342.161	1.72141	7.06817e-80	6
YOR378W	AMF1	protein_coding	XV	Low affinity NH4+ transporter; member of the DHA2 family of drug:H+ anti porters; putative paralog of ATR1; but not required for boron tolerance; non-essential gene	99.9821	1.71811	4.40536e-26	6
YBL064C	PRX1	protein_coding	II	Mitochondrial peroxiredoxin with thioredoxin peroxidase activity; has a role in reduction of hydroperoxides; reactivation requires Trr2p and glutathione; induced during respiratory growth and oxidative stress; phosphorylated; protein abundance increases in response to DNA replication stress	243.198	1.71635	7.78983e-46	1
YER045C	ACA1	protein_coding	V	ATF/CREB family basic leucine zipper (bZIP) transcription factor; binds as a homodimer to the ATF/CREB consensus sequence TGACGTCA; important for carbon source utilization; target genes include GRE2 and COS8; ACA1 has a paralog, CST6, that arose from the whole genome duplication	486.542	1.71528	1.7363e-68	6
YLR297W		protein_coding	XII	Protein of unknown function; green fluorescent protein (GFP)-fusion protein localizes to the vacuole; not an essential gene; induced by treatment with 8-methoxypsoralen and UVA irradiation; relocalizes from nucleus to vacuole upon DNA replication stress; YLR297W has a paralog, YOR186W, that arose from the whole genome duplication	93.9986	1.71162	1.09661e-22	6
YER067W	RGI1	protein_coding	V	Protein of unknown function; involved in energy metabolism under respiratory conditions; protein abundance is increased upon intracellular iron depletion or in response to DNA replication stress; RGI1 has a paralog, RGI2, that arose from the whole genome duplication	221.236	1.69889	5.21979e-09	1
YNL234W		protein_coding	XIV	Protein of unknown function with similarity to globins; has a functional heme-binding domain; mutant has aneuploidy tolerance; transcription induced by stress conditions; may be involved in glucose signaling or metabolism; regulated by Rgt1	158.376	1.69586	1.72006e-35	6
YBR203W	COS111	protein_coding	II	Protein required for antifungal drug ciclopirox olamine resistance; not related to the subtelomerically-encoded COS family; the authentic, non-tagged protein is detected in highly purified mitochondria in high-throughput studies	876.406	1.68809	2.10794e-126	6
YNR058W	BIO3	protein_coding	XIV	7,8-diamino-pelargonic acid aminotransferase (DAPA); catalyzes the second step in the biotin biosynthesis pathway; BIO3 is in a cluster of 3 genes (BIO3, BIO4, and BIO5) that mediate biotin synthesis; BIO3 and BIO4 were acquired by horizontal gene transfer (HGT) from bacteria	156.035	1.68005	1.72229e-30	6
YMR250W	GAD1	protein_coding	XIII	Glutamate decarboxylase; converts glutamate into gamma-aminobutyric acid (GABA) during glutamate catabolism; involved in response to oxidative stress	459.812	1.67708	9.07719e-44	1
YLR312C		protein_coding	XII	Autophagy receptor with a role in degradation of the ER and nucleus; involved specifically in autophagy of perinuclear endoplasmic reticulum in response to nitrogen starvation or rapamycin treatment; localizes to the perinuclear ER	51.9164	1.6695	1.21881e-11	6
YHR177W	YHR177W	protein_coding	VIII	Putative transcription factor containing a WOPR domain; binds DNA in vitro; similar to C. albicans Wor1p transcription factor that regulates white-opaque switching; overexpression causes a cell cycle delay or arrest	110.271	1.6694	1.39739e-22	6
YFR015C	GSY1	protein_coding	VI	Glycogen synthase; expression induced by glucose limitation, nitrogen starvation, environmental stress, and entry into stationary phase; GSY1 has a paralog, GSY2, that arose from the whole genome duplication; relocalizes from nucleus to cytoplasmic foci upon DNA replication stress	806.63	1.66879	8.74724e-86	1
YNL160W	YGP1	protein_coding	XIV	Cell wall-related secretory glycoprotein; induced by nutrient deprivation-associated growth arrest and upon entry into stationary phase; may be involved in adaptation prior to stationary phase entry; YGP1 has a paralog, SPS100, that arose from the whole genome duplication	899.737	1.66065	4.93884e-35	1
YER053C-A		protein_coding	V	Protein of unknown function; green fluorescent protein (GFP)-fusion protein localizes to the endoplasmic reticulum; protein abundance increases in response to DNA replication stress	363.615	1.65375	1.54693e-13	6
YNL173C	MDG1	protein_coding	XIV	Plasma membrane protein; involved in G-protein mediated pheromone signaling pathway; overproduction suppresses bem1 mutations; MDG1 has a paralog, CRP1, that arose from the whole genome duplication	469.677	1.65162	2.99639e-51	6
YJR061W		protein_coding	X	Putative protein of unknown function; non-essential gene; transcription repressed by Rm101p; YJR061W has a paralog, MNN4, that arose from the whole genome duplication	380.472	1.6441	4.33771e-63	1
YBL029W		protein_coding	II	Non-essential protein of unknown function	91.0223	1.6435	4.4628e-23	6
YPL092W	SSU1	protein_coding	XVI	Plasma membrane sulfite pump involved in sulfite metabolism; required for efficient sulfite efflux; major facilitator superfamily protein	356.336	1.64275	1.80352e-38	1
YJL213W		protein_coding	X	Protein of unknown function that may interact with ribosomes; periodically expressed during the yeast metabolic cycle; phosphorylated in vitro by the mitotic exit network (MEN) kinase complex, Dbf2p/Mob1p	238.764	1.63484	2.13132e-58	6
YOR328W	PDR10	protein_coding	XV	ATP-binding cassette (ABC) transporter; multidrug transporter involved in the pleiotropic drug resistance network; regulated by Pdr1p and Pdr3p	925.187	1.62152	2.60338e-131	6
YHR049W	FSH1	protein_coding	VIII	Putative serine hydrolase; localizes to both the nucleus and cytoplasm; sequence is similar to S. cerevisiae Fsh2p and Fsh3p and the human candidate tumor suppressor OVCA2	1383.9	1.61907	1.24597e-192	6
YFR053C	HXK1	protein_coding	VI	Hexokinase isoenzyme 1; a cytosolic protein that catalyzes phosphorylation of glucose during glucose metabolism; expression is highest during growth on non-glucose carbon sources; glucose-induced repression involves hexokinase Hxk2p; HXK1 has a paralog, HXK2, that arose from the whole genome duplication	2189.9	1.60479	1.24184e-23	1
YHR092C	HXT4	protein_coding	VIII	High-affinity glucose transporter; member of the major facilitator superfamily, expression is induced by low levels of glucose and repressed by high levels of glucose; HXT4 has a paralog, HXT7, that arose from the whole genome duplication	3444.62	1.60301	2.71985e-55	1
YCL042W		protein_coding	III	Putative protein of unknown function; epitope-tagged protein localizes to the cytoplasm	122.3	1.60108	1.08848e-16	6
YPL222W	FMP40	protein_coding	XVI	Putative protein of unknown function; proposed to be involved in responding to environmental stresses; the authentic, non-tagged protein is detected in highly purified mitochondria in high-throughput studies	314.176	1.59315	4.44899e-48	6
YIL111W	COX5B	protein_coding	IX	Subunit Vb of cytochrome c oxidase; cytochrome c oxidase is the terminal member of the mitochondrial inner membrane electron transport chain; Cox5Bp is predominantly expressed during anaerobic growth while its isoform Va (Cox5Ap) is expressed during aerobic growth; COX5B has a paralog, COX5A, that arose from the whole genome duplication	231.417	1.58622	1.84694e-25	6
YAL062W	GDH3	protein_coding	I	NADP(+)-dependent glutamate dehydrogenase; synthesizes glutamate from ammonia and alpha-ketoglutarate; rate of alpha-ketoglutarate utilization differs from Gdh1p; expression regulated by nitrogen and carbon sources; GDH3 has a paralog, GDH1, that arose from the whole genome duplication	104.645	1.58528	8.49958e-20	6
YDR077W	SED1	protein_coding	IV	Major stress-induced structural GPI-cell wall glycoprotein; associates with translating ribosomes, possible role in mitochondrial genome maintenance; ORF contains two distinct variable minisatellites; SED1 has a paralog, SPI1, that arose from the whole genome duplication	40786.6	1.58022	9.37451e-70	1
YOR107W	RGS2	protein_coding	XV	Negative regulator of glucose-induced cAMP signaling; directly activates the GTPase activity of the heterotrimeric G protein alpha subunit Gpa2p	119.978	1.57649	5.46072e-16	6
YMR136W	GAT2	protein_coding	XIII	Protein containing GATA family zinc finger motifs; similar to Gln3p and Dal80p; expression repressed by leucine	316.243	1.57541	3.83156e-36	6
YMR291W	TDA1	protein_coding	XIII	Protein kinase of unknown cellular role; green fluorescent protein (GFP)-fusion protein localizes to the cytoplasm and nucleus; null mutant is sensitive to expression of the top1-T722A allele; not an essential gene; relocalizes from nucleus to cytoplasm upon DNA replication stress	972.348	1.57146	3.89797e-64	6
YDR009W	GAL3	protein_coding	IV	Transcriptional regulator; involved in activation of the GAL genes in response to galactose; forms a complex with Gal80p to relieve Gal80p inhibition of Gal4p; binds galactose and ATP but does not have galactokinase activity; GAL3 has a paralog, GAL1, that arose from the whole genome duplication	101.361	1.57072	1.09312e-21	6
YDR044W	HEM13	protein_coding	IV	Coproporphyrinogen III oxidase; oxygen-requiring enzyme that catalyzes sixth step in heme biosynthetic pathway; transcription is repressed by oxygen and heme (via Rox1p and Hap1p); human homolog CPOX can complement yeast mutant and allow growth of haploid null after sporulation of a heterozygous diploid	1386.95	1.563	6.75094e-176	6
YJR127C	RSF2	protein_coding	X	Zinc-finger protein; involved in transcriptional control of both nuclear and mitochondrial genes, many of which specify products required for glycerol-based growth, respiration, and other functions; RSF2 has a paralog, TDA9, that arose from the whole genome duplication; relocalizes from nucleus to cytoplasm upon DNA replication stress	823.05	1.56239	1.66709e-89	6
YOL126C	MDH2	protein_coding	XV	Cytoplasmic malate dehydrogenase; one of three isozymes that catalyze interconversion of malate and oxaloacetate; involved in the glyoxylate cycle and gluconeogenesis during growth on two-carbon compounds; interacts with Pck1p and Fbp1	595.096	1.56036	3.64626e-63	6
YDL022W	GPD1	protein_coding	IV	NAD-dependent glycerol-3-phosphate dehydrogenase; key enzyme of glycerol synthesis, essential for growth under osmotic stress; expression regulated by high-osmolarity glycerol response pathway; protein abundance increases in response to DNA replication stress; constitutively inactivated via phosphorylation by the protein kinases Ypk1p and Ypk2p, dephosphorylation increases catalytic activity; for…	1615.2	1.52848	9.60022e-136	1
YGL045W	RIM8	protein_coding	VII	Protein involved in proteolytic activation of Rim101p; part of response to alkaline pH; interacts with ESCRT-1 subunits Stp22p and Vps28p; essential for anaerobic growth; member of the arrestin-related trafficking adaptor family	237.248	1.51533	1.16172e-42	6
YCR021C	HSP30	protein_coding	III	Negative regulator of the H(+)-ATPase Pma1p; stress-responsive protein; hydrophobic plasma membrane localized; induced by heat shock, ethanol treatment, weak organic acid, glucose limitation, and entry into stationary phase	50.3848	1.50119	0.000126307	6
YKR076W	ECM4	protein_coding	XI	S-glutathionyl-(chloro)hydroquinone reductase (GS-HQR); glutathione transferase involved in cell-surface biosynthesis and architecture; catalyzes glutathione (GSH)-dependent reduction of GS-trichloro-p-hydroquinone to trichloro-p-hydroquinone; expression upregulated upon exposure to genotoxic agents, such as methyl methanesulfonate, cisplatin and bleomycin; not an essential gene; similar to YGR15…	282.757	1.48497	7.17245e-39	6
YBR296C	PHO89	protein_coding	II	Plasma membrane Na+/Pi cotransporter; active in early growth phase; similar to phosphate transporters of Neurospora crassa; transcription regulated by inorganic phosphate concentrations and Pho4p; mutations in related human transporter genes hPit1 and hPit2 are associated with hyperphosphatemia-induced calcification of vascular tissue and familial idiopathic basal ganglia calcification	1232.81	1.48179	7.15303e-34	1
YHR033W		protein_coding	VIII	Putative protein of unknown function; epitope-tagged protein localizes to the cytoplasm; YHR033W has a paralog, PRO1, that arose from the whole genome duplication	516.016	1.48073	4.65734e-37	6
YMR008C	PLB1	protein_coding	XIII	Phospholipase B (lysophospholipase) involved in lipid metabolism; required for efficient acyl chain remodeling of newly synthesized phosphatidylethanolamine-derived phosphatidylcholine; required for deacylation of phosphatidylcholine and phosphatidylethanolamine but not phosphatidylinositol; PLB1 has a paralog, PLB3, that arose from the whole genome duplication	3602.18	1.47491	1.57117e-149	1
YOR011W	AUS1	protein_coding	XV	Plasma membrane sterol transporter of the ATP-binding cassette family; required, along with Pdr11p, for uptake of exogenous sterols and their incorporation into the plasma membrane; activity is stimulated by phosphatidylserine; sterol uptake is required for anaerobic growth because sterol biosynthesis requires oxygen; AUS1 has a paralog, PDR11, that arose from the whole genome duplication	839.852	1.46706	5.00801e-58	6
YFR017C	IGD1	protein_coding	VI	Cytoplasmic protein that inhibits Gdb1p glycogen debranching activity; required for normal intracellular accumulation of glycogen; phosphorylated in vivo; expression increases during wine fermentation; protein abundance increases in response to DNA replication stress; IGD1 has a paralog, YOL024W, that arose from the whole genome duplication	80.4492	1.46655	1.98058e-11	6
YIL155C	GUT2	protein_coding	IX	Mitochondrial glycerol-3-phosphate dehydrogenase; expression is repressed by both glucose and cAMP and derepressed by non-fermentable carbon sources in a Snf1p, Rsf1p, Hap2/3/4/5 complex dependent manner	900.332	1.46628	1.09958e-94	1
YGL121C	GPG1	protein_coding	VII	Proposed gamma subunit of the heterotrimeric G protein; interacts with the receptor Gpr1p; involved in regulation of pseudohyphal growth; requires Gpb1p or Gpb2p to interact with Gpa2p; overproduction causes prion curing	52.2948	1.46331	6.94236e-08	6
YEL060C	PRB1	protein_coding	V	Vacuolar proteinase B (yscB) with H3 N-terminal endopeptidase activity; serine protease of the subtilisin family; involved in protein degradation in the vacuole and required for full protein degradation during sporulation; activity inhibited by Pbi2p; protein abundance increases in response to DNA replication stress; PRB1 has a paralog, YSP3, that arose from the whole genome duplication	3983.04	1.46143	1.20178e-186	1
YGR256W	GND2	protein_coding	VII	6-phosphogluconate dehydrogenase (decarboxylating); catalyzes an NADPH regenerating reaction in the pentose phosphate pathway; required for growth on D-glucono-delta-lactone; GND2 has a paralog, GND1, that arose from the whole genome duplication	125.299	1.46141	2.85552e-13	6
YOR185C	GSP2	protein_coding	XV	GTP binding protein (mammalian Ranp homolog); involved in the maintenance of nuclear organization, RNA processing and transport; interacts with Kap121p, Kap123p and Pdr6p (karyophilin betas); not required for viability; protein abundance increases in response to DNA replication stress; GSP2 has a paralog, GSP1, that arose from the whole genome duplication	204.108	1.45693	5.03753e-32	6
YAL060W	BDH1	protein_coding	I	NAD-dependent (R,R)-butanediol dehydrogenase; catalyzes oxidation of (R,R)-2,3-butanediol to (3R)-acetoin, oxidation of meso-butanediol to (3S)-acetoin, and reduction of acetoin; enhances use of 2,3-butanediol as an aerobic carbon source	1018.96	1.45448	3.14237e-63	6
YMR105C	PGM2	protein_coding	XIII	Phosphoglucomutase; catalyzes the conversion from glucose-1-phosphate to glucose-6-phosphate, which is a key step in hexose metabolism; functions as the acceptor for a Glc-phosphotransferase; protein abundance increases in response to DNA replication stress; PGM2 has a paralog, PGM1, that arose from the whole genome duplication	622.829	1.44758	7.44167e-35	6
YMR251W-A	HOR7	protein_coding	XIII	Protein of unknown function; overexpression suppresses Ca2+ sensitivity of mutants lacking inositol phosphorylceramide mannosyltransferases Csg1p and Csh1p; transcription is induced under hyperosmotic stress and repressed by alpha factor; HOR7 has a paralog, DDR2, that arose from the whole genome duplication	1526.63	1.44685	9.82927e-82	6
YBR085C-A		protein_coding	II	Protein of unknown function; green fluorescent protein (GFP)-fusion protein localizes to the cytoplasm and to the nucleus; protein abundance increases in response to DNA replication stress	936.837	1.44074	5.32854e-88	1
YHL040C	ARN1	protein_coding	VIII	ARN family transporter for siderophore-iron chelates; responsible for uptake of iron bound to ferrirubin, ferrirhodin, and related siderophores; protein increases in abundance and relocalizes to the vacuole upon DNA replication stress	957.462	1.42897	3.37799e-14	6
YJR115W		protein_coding	X	Putative protein of unknown function; YJR115W has a paralog, ECM13, that arose from the whole genome duplication	64.7256	1.42797	9.64048e-13	6
YBR085W	AAC3	protein_coding	II	Mitochondrial inner membrane ADP/ATP translocator; exchanges cytosolic ADP for mitochondrially synthesized ATP; expressed under anaerobic conditions; similar to Aac1p; has roles in maintenance of viability and in respiration; AAC3 has a paralog, PET9, that arose from the whole genome duplication	133.81	1.42529	2.04803e-19	6
YNL200C	NNR1	protein_coding	XIV	NADHX epimerase; catalyzes isomerization of (R)- and (S)-NADHX; homologous to AIBP in mammals and the N- terminal domain of YjeF in E.coli; enzyme is widespread in eukaryotes, prokaryotes and archaea; the authentic, non-tagged protein is detected in highly purified mitochondria in high-throughput studies	356.533	1.42189	3.48388e-33	6
YBR132C	AGP2	protein_coding	II	Plasma membrane regulator of polyamine and carnitine transport; has similarity to transporters but lacks transport activity; may act as a sensor that transduces environmental signals; has a positive or negative regulatory effect on transcription of many transporter genes	703.723	1.414	9.04714e-57	6
YIR039C	YPS6	protein_coding	IX	Putative GPI-anchored aspartic protease; member of the yapsin family of proteases involved in cell wall growth and maintenance	381.296	1.40616	4.48817e-41	6
YFL054C	AQY3	protein_coding	VI	Putative channel-like protein; similar to Fps1p; mediates passive diffusion of glycerol in the presence of ethanol	283.97	1.40254	6.33717e-34	6
YKL062W	MSN4	protein_coding	XI	Stress-responsive transcriptional activator; activated in stochastic pulses of nuclear localization in response to various stress conditions; binds DNA at stress response elements of responsive genes, inducing gene expression; involved in diauxic shift	982.26	1.40026	2.19055e-94	6
YDL130W-A	STF1	protein_coding	IV	Protein involved in regulation of the mitochondrial F1F0-ATP synthase; Stf1p and Stf2p act as stabilizing factors that enhance inhibitory action of the Inh1p protein; protein abundance increases in response to DNA replication stress; STF1 has a paralog, INH1, that arose from the whole genome duplication	229.411	1.39958	6.4261e-18	6
YKR053C	YSR3	protein_coding	XI	Dihydrosphingosine 1-phosphate phosphatase; membrane protein involved in sphingolipid metabolism; YSR3 has a paralog, LCB3, that arose from the whole genome duplication	233.829	1.3986	5.29899e-37	1
YBR092C	PHO3	protein_coding	II	Constitutively expressed acid phosphatase similar to Pho5p; brought to the cell surface by transport vesicles; hydrolyzes thiamin phosphates in the periplasmic space, increasing cellular thiamin uptake; expression is repressed by thiamin	2431.85	1.39373	2.3378e-83	6
YPR196W		protein_coding	XVI	Putative maltose-responsive transcription factor	182.577	1.39118	1.70743e-30	6
YNL065W	AQR1	protein_coding	XIV	Plasma membrane transporter of the major facilitator superfamily; member of the 12-spanner drug:H(+) antiporter DHA1 family; confers resistance to short-chain monocarboxylic acids and quinidine; involved in the excretion of excess amino acids; AQR1 has a paralog, QDR1, that arose from the whole genome duplication; relocalizes from plasma membrane to cytoplasm upon DNA replication stress	894.553	1.38124	7.04218e-28	6
YMR305C	SCW10	protein_coding	XIII	Cell wall protein with similarity to glucanases; may play a role in conjugation during mating based on mutant phenotype and its regulation by Ste12p; SWC10 has a paralog, SCW4, that arose from the whole genome duplication	8048.53	1.36664	5.13036e-103	1
YLR438W	CAR2	protein_coding	XII	L-ornithine transaminase (OTAse); catalyzes the second step of arginine degradation, expression is dually-regulated by allophanate induction and a specific arginine induction process; not nitrogen catabolite repression sensitive; protein abundance increases in response to DNA replication stress; human homolog OAT complements yeast null mutant	1169.99	1.36085	6.15543e-46	6
YJR094C	IME1	protein_coding	X	Master regulator of meiosis that is active only during meiotic events; activates transcription of early meiotic genes through interaction with Ume6p; degraded by the 26S proteasome following phosphorylation by Ime2p; transcription is negatively regulated in cis by the IRT1 long noncoding antisense RNA	50.8854	1.36045	6.43562e-09	6
YDR534C	FIT1	protein_coding	IV	Mannoprotein that is incorporated into the cell wall; incorporated via a glycosylphosphatidylinositol (GPI) anchor; involved in the retention of siderophore-iron in the cell wall	125.143	1.35604	8.06303e-22	6
YPR002W	PDH1	protein_coding	XVI	Putative 2-methylcitrate dehydratase; mitochondrial protein that participates in respiration; induced by diauxic shift; homologous to E. coli PrpD, may take part in the conversion of 2-methylcitrate to 2-methylisocitrate	176.573	1.35495	8.38868e-14	6
YOR273C	TPO4	protein_coding	XV	Polyamine transporter of the major facilitator superfamily; member of the 12-spanner drug:H(+) antiporter DHA1 family; recognizes spermine, putrescine, and spermidine; localizes to the plasma membrane	946.982	1.35454	7.78305e-41	6
YDR032C	PST2	protein_coding	IV	Protein with similarity to a family of flavodoxin-like proteins; induced by oxidative stress in a Yap1p dependent manner; the authentic, non-tagged protein is detected in highly purified mitochondria in high-throughput studies; protein abundance increases in response to DNA replication stress; PST2 has a paralog, RFS1, that arose from the whole genome duplication	1750.78	1.35349	6.64489e-72	6
YBR230C	OM14	protein_coding	II	Mitochondrial outer membrane receptor for cytosolic ribosomes; integral protein of the outer membrane that interacts with the nascent chain-associated complex (NAC) bound to ribosomes, contributing to co-translational mitochondrial import; interacts with porin (Por1p) and Om45p; abundance is decreased in cells grown in glucose relative to other carbon sources	386.861	1.34223	8.13026e-48	6
YML100W	TSL1	protein_coding	XIII	Large subunit of trehalose 6-phosphate synthase/phosphatase complex; Tps1p-Tps2p complex converts uridine-5'-diphosphoglucose and glucose 6-phosphate to trehalose; contributes to survival to acute lethal heat stress; mutant has aneuploidy tolerance; protein abundance increases in response to DNA replication stress; TSL1 has a paralog, TPS3, that arose from the whole genome duplication	1736.28	1.33384	1.57056e-33	6
YOL154W	ZPS1	protein_coding	XV	Putative GPI-anchored protein; transcription is induced under low-zinc conditions, as mediated by the Zap1p transcription factor, and at alkaline pH	109.341	1.33331	2.94505e-18	6
YDR085C	AFR1	protein_coding	IV	Protein required for pheromone-induced projection (shmoo) formation; regulates septin architecture during mating; has an RVXF motif that mediates targeting of Glc7p to mating projections; interacts with Cdc12p; AFR1 has a paralog, YER158C, that arose from the whole genome duplication	488.54	1.32925	1.64466e-38	6
YMR195W	ICY1	protein_coding	XIII	Protein of unknown function; required for viability in rich media of cells lacking mitochondrial DNA; mutants have an invasive growth defect with elongated morphology; induced by amino acid starvation; ICY1 has a paralog, ICY2, that arose from the whole genome duplication	179.398	1.32869	1.91171e-20	6
YER033C	ZRG8	protein_coding	V	Protein of unknown function; authentic, non-tagged protein is detected in highly purified mitochondria in high-throughput studies; GFP-fusion protein is localized to the cytoplasm; transcription induced under conditions of zinc deficiency	445.229	1.32746	4.45591e-39	6
YOR338W		protein_coding	XV	Putative protein of unknown function; YOR338W transcription is regulated by Azf1p and its transcript is a specific target of the G protein effector Scp160p; identified as being required for sporulation in a high-throughput mutant screen; YOR338W has a paralog, FUN19, that arose from the whole genome duplication	136.52	1.32528	3.22762e-11	6
YBR214W	SDS24	protein_coding	II	Protein involved in cell separation during budding; one of two S. cerevisiae homologs (Sds23p and Sds24p) of the S. pombe Sds23 protein, which is implicated in APC/cyclosome regulation; may play an indirect role in fluid-phase endocytosis; protein abundance increases in response to DNA replication stress; SDS24 has a paralog, SDS23, that arose from the whole genome duplication	703.147	1.31789	1.17808e-32	6
YJL077W-B		protein_coding	X	Putative protein of unknown function; identified by gene-trapping, microarray-based expression analysis, and genome-wide homology searching	696.583	1.31778	4.2242e-60	6
YHL008C		protein_coding	VIII	Putative protein of unknown function; may be involved in the uptake of chloride ions; does not appear to be involved in monocarboxylic acid transport; green fluorescent protein (GFP)-fusion protein localizes to the vacuole	224.094	1.3075	1.61773e-33	6
YML116W	ATR1	protein_coding	XIII	Multidrug efflux pump of the major facilitator superfamily; required for resistance to aminotriazole and 4-nitroquinoline-N-oxide; ATR1 has a paralog, YMR279C, that arose from the whole genome duplication; protein abundance increases in response to DNA replication stress	492.617	1.30375	2.30529e-25	6
YLL028W	TPO1	protein_coding	XII	Polyamine transporter of the major facilitator superfamily; member of the 12-spanner drug:H(+) antiporter DHA1 family; recognizes spermine, putrescine, and spermidine; catalyzes uptake of polyamines at alkaline pH and excretion at acidic pH; during oxidative stress exports spermine, spermidine from the cell, which controls timing of expression of stress-responsive genes; phosphorylation enhances …	2750.81	1.30336	5.90924e-62	6
YNL014W	HEF3	protein_coding	XIV	Translational elongation factor EF-3; member of the ABC superfamily; stimulates EF-1 alpha-dependent binding of aminoacyl-tRNA by the ribosome; normally expressed in zinc deficient cells; HEF3 has a paralog, YEF3, that arose from the whole genome duplication	150.125	1.29293	1.28912e-18	6
YBR114W	RAD16	protein_coding	II	Nucleotide excision repair (NER) protein; binds damaged DNA during NER; binds DNA in an ATP-dependent manner (with Rad7p) during NER; required for NER of non-transcribed chromatin; subunit of Nucleotide Excision Repair Factor 4 (NEF4) and the Elongin-Cullin-Socs (ECS) ligase complex	439.13	1.28451	1.21661e-56	6
YKL051W	SFK1	protein_coding	XI	Plasma membrane protein that may act to generate normal levels of PI4P; may act together with or upstream of Stt4p; at least partially mediates proper localization of Stt4p to the plasma membrane	284.614	1.27626	2.88078e-29	6
YDR171W	HSP42	protein_coding	IV	Small heat shock protein (sHSP) with chaperone activity; forms barrel-shaped oligomers that suppress unfolded protein aggregation; involved in cytoskeleton reorganization after heat shock; protein abundance increases and forms cytoplasmic foci in response to DNA replication stress	280.455	1.27572	2.50152e-20	6
YLR213C	CRR1	protein_coding	XII	Putative glycoside hydrolase of the spore wall envelope; required for normal spore wall assembly, possibly for cross-linking between the glucan and chitosan layers; expressed during sporulation	50.6444	1.27303	1.2344e-08	6
YHR138C		protein_coding	VIII	Protein of unknown function; similar to Pbi2p; double null mutant lacking Pbi2p and Yhr138cp exhibits highly fragmented vacuoles; protein abundance increases in response to DNA replication stress	181.279	1.26606	3.01027e-17	6
YIL122W	POG1	protein_coding	IX	Nuclear chromatin-associated protein of unknown function; may have a role in cell cycle regulation; overexpression promotes recovery from pheromone induced arrest and suppresses the stress sensitivity caused by a mutation in the E3 ubiquitin ligase Rsp5p; binds upstream of BAR1 and cell cycle-related genes; phsosphoylated form may be ubiquitinated by Dma2p; potential Cdc28p substrate; SBF regulat…	159.896	1.25334	2.77897e-16	6
YPR149W	NCE102	protein_coding	XVI	Protein of unknown function; contains transmembrane domains; involved in secretion of proteins that lack classical secretory signal sequences; component of the detergent-insoluble glycolipid-enriched complexes (DIGs); NCE102 has a paralog, FHN1, that arose from the whole genome duplication	5958.02	1.24948	2.11026e-60	6
YGR008C	STF2	protein_coding	VII	Protein involved in resistance to desiccation stress; Stf2p exhibits antioxidant properties, and its overexpression prevents ROS accumulation and apoptosis; binds to F0 sector of mitochondrial F1F0 ATPase in vitro and may modulate the inhibitory action of Inh1p and Stf1p; protein abundance increases in response to DNA replication stress; STF2 has a paralog, TMA10, that arose from the whole genome…	146.313	1.24514	1.40618e-11	6
YBL049W	MOH1	protein_coding	II	Protein of unknown function, essential for stationary phase survival; not required for growth on nonfermentable carbon sources; possibly linked with vacuolar transport	66.5821	1.24011	9.48105e-06	6
YDR516C	EMI2	protein_coding	IV	Non-essential protein of unknown function; required for transcriptional induction of the early meiotic-specific transcription factor IME1; required for sporulation; expression regulated by glucose-repression transcription factors Mig1/2p; EMI2 has a paralog, GLK1, that arose from the whole genome duplication; protein abundance increases in response to DNA replication stress	1219.16	1.23677	7.5565e-86	6
YMR006C	PLB2	protein_coding	XIII	Phospholipase B (lysophospholipase) involved in lipid metabolism; displays transacylase activity in vitro; overproduction confers resistance to lysophosphatidylcholine	1180.97	1.22486	1.1453e-29	6
YGL179C	TOS3	protein_coding	VII	Protein kinase; related to and functionally redundant with Elm1p and Sak1p for the phosphorylation and activation of Snf1p; functionally orthologous to LKB1, a mammalian kinase associated with Peutz-Jeghers cancer-susceptibility syndrome; TOS3 has a paralog, SAK1, that arose from the whole genome duplication	164.865	1.22316	1.48189e-17	6
YAR035W	YAT1	protein_coding	I	Outer mitochondrial carnitine acetyltransferase; minor ethanol-inducible enzyme involved in transport of activated acyl groups from the cytoplasm into the mitochondrial matrix; phosphorylated	124.741	1.22181	3.41818e-14	6
YER037W	PHM8	protein_coding	V	Lysophosphatidic acid (LPA) phosphatase, nucleotidase; principle and physiological nucleotidase working on GMP, UMP and CMP; involved in LPA hydrolysis in response to phosphate starvation and ribose salvage pathway; phosphatase activity is soluble and Mg2+ dependent; expression is induced by low phosphate levels and by inactivation of Pho85p; repressed by Gcn4p under normal conditions; PHM8 has a…	418.607	1.22157	1.76898e-60	6
YHR043C	DOG2	protein_coding	VIII	2-deoxyglucose-6-phosphate phosphatase; member of a family of low molecular weight phosphatases, induced by oxidative and osmotic stress, confers 2-deoxyglucose resistance when overexpressed; DOG2 has a paralog, DOG1, that arose from a single-locus duplication; the last half of DOG1 and DOG2 are subject to gene conversions among S. cerevisiae, S. paradoxus, and S. mikatae	307.332	1.22025	9.45056e-29	6
YCL038C	ATG22	protein_coding	III	Vacuolar integral membrane protein required for efflux of amino acids; required for efflux of amino acids during autophagic body breakdown in the vacuole; null mutation causes a gradual loss of viability during starvation	495.115	1.21583	5.62247e-29	6
YMR280C	CAT8	protein_coding	XIII	Zinc cluster transcriptional activator; necessary for derepression of a variety of genes under non-fermentative growth conditions, active after diauxic shift, binds carbon source responsive elements; relative distribution to the nucleus increases upon DNA replication stress	209.403	1.20578	4.65306e-19	6
YDR019C	GCV1	protein_coding	IV	T subunit of the mitochondrial glycine decarboxylase complex; glycine decarboxylase is required for the catabolism of glycine to 5,10-methylene-THF; expression is regulated by levels of levels of 5,10-methylene-THF in the cytoplasm	570.2	1.19966	3.1939e-43	6
YPL154C	PEP4	protein_coding	XVI	Vacuolar aspartyl protease (proteinase A); required for posttranslational precursor maturation of vacuolar proteinases; important for protein turnover after oxidative damage; plays a protective role in acetic acid induced apoptosis; synthesized as a zymogen, self-activates	7739.33	1.18529	3.56497e-109	6
YPL004C	LSP1	protein_coding	XVI	Eisosome core component; eisosomes are large immobile patch structures at the cell cortex associated with endocytosis; phosphorylated on Thr233 upon Pkc1p hyperactivation in a Slt2p MAPK-dependent fashion; null mutants show activation of Pkc1p/Ypk1p stress resistance pathways; member of the BAR domain family	2834.68	1.171	4.83504e-78	6
YNL180C	RHO5	protein_coding	XIV	Non-essential small GTPase of the Rho/Rac family of Ras-like proteins; RAC1 ortholog; regulated by phosphorylation and ubiquitination; likely involved in protein kinase C (Pkc1p)-dependent signal transduction pathway that controls cell integrity	770.786	1.16938	3.10238e-33	6
YPL014W	CIP1	protein_coding	XVI	Cyclin-dependent kinase inhibitor; interacts with and inhibits the Cdc28p/Cln2p, G1/S phase cyclin-dependent kinase complex but not S-phase, or M-phase complexes; overexpression blocks cells in G1 phase and stabilizes the Cdc28p inhibitor Sic1p, while disruption accelerates the G1/S phase transition; phosphorylated during S phase in a Cdc28p-dependent manner; green fluorescent protein (GFP)-fusio…	153.966	1.16903	4.03323e-12	6
YMR194C-B	CMC4	protein_coding	XIII	Protein that localizes to the mitochondrial intermembrane space; localizes via the Mia40p-Erv1p system; contains twin cysteine-x(9)-cysteine motifs	70.4633	1.16612	2.1153e-09	6
YGL037C	PNC1	protein_coding	VII	Nicotinamidase that converts nicotinamide to nicotinic acid; part of the NAD(+) salvage pathway; required for life span extension by calorie restriction; lacks a peroxisomal targeting signal but is imported into peroxisomes via binding to Gpd1p; PNC1 expression responds to all known stimuli that extend replicative life span; protein increases in abundance and relative distribution to cytoplasmic …	1049.53	1.16429	2.88906e-51	6
YCR102C		protein_coding	III	Putative protein of unknown function; involved in copper metabolism; similar to C. carbonum toxD gene; member of the quinone oxidoreductase family	87.777	1.16224	2.0698e-09	6
YGR244C	LSC2	protein_coding	VII	Beta subunit of succinyl-CoA ligase; succinyl-CoA ligase is a mitochondrial enzyme of the TCA cycle that catalyzes the nucleotide-dependent conversion of succinyl-CoA to succinate	1146.69	1.1549	1.01434e-86	6
YGR161C	RTS3	protein_coding	VII	Putative component of the protein phosphatase type 2A complex	745.918	1.15005	7.43285e-35	6
YMR016C	SOK2	protein_coding	XIII	Nuclear protein that negatively regulates pseudohyphal differentiation; plays a regulatory role in the cyclic AMP (cAMP)-dependent protein kinase (PKA) signal transduction pathway; relocalizes to the cytosol in response to hypoxia; SOK2 has a paralog, PHD1, that arose from the whole genome duplication	677.245	1.14517	4.21574e-26	6
YBR139W		protein_coding	II	Putative serine type carboxypeptidase; role in phytochelatin synthesis; green fluorescent protein (GFP)-fusion protein localizes to the vacuole; expression induced by nitrogen limitation in a GLN3, GAT1-independent manner	2205.82	1.141	1.48422e-79	6
YIL116W	HIS5	protein_coding	IX	Histidinol-phosphate aminotransferase; catalyzes the seventh step in histidine biosynthesis; responsive to general control of amino acid biosynthesis; mutations cause histidine auxotrophy and sensitivity to Cu, Co, and Ni salts	681.359	1.14019	4.33994e-42	5
YGR289C	MAL11	protein_coding	VII	High-affinity maltose transporter (alpha-glucoside transporter); inducible; encoded in the MAL1 complex locus; broad substrate specificity that includes maltotriose; required for isomaltose utilization	179.123	1.1393	1.45156e-21	6
YLR176C	RFX1	protein_coding	XII	Major transcriptional repressor of DNA-damage-regulated genes; recruits repressors Tup1p and Cyc8p to their promoters; involved in DNA damage and replication checkpoint pathway; similar to a family of mammalian DNA binding RFX1-4 proteins	168.577	1.13754	1.67073e-14	6
YJR151C	DAN4	protein_coding	X	Cell wall mannoprotein; has similarity to Tir1p, Tir2p, Tir3p, and Tir4p; expressed under anaerobic conditions, completely repressed during aerobic growth	98.7786	1.13411	3.61631e-10	6
YEL065W	SIT1	protein_coding	V	Ferrioxamine B transporter; member of the ARN family of transporters that specifically recognize siderophore-iron chelates; transcription is induced during iron deprivation and diauxic shift; potentially phosphorylated by Cdc28p	1863.29	1.13293	1.41653e-07	6
YBR006W	UGA2	protein_coding	II	Succinate semialdehyde dehydrogenase; involved in the utilization of gamma-aminobutyrate (GABA) as a nitrogen source; part of the 4-aminobutyrate and glutamate degradation pathways; localized to the cytoplasm	198.469	1.1321	7.2478e-21	6
YBR297W	MAL33	protein_coding	II	MAL-activator protein; part of complex locus MAL3; nonfunctional in genomic reference strain S288C	377.324	1.12971	3.14091e-26	6
YDL241W		protein_coding	IV	Putative protein of unknown function; SWAT-GFP and mCherry fusion proteins localize to the endoplasmic reticulum; YDL241W is not an essential gene	218.083	1.12786	3.87632e-20	6
YLR258W	GSY2	protein_coding	XII	Glycogen synthase; expression induced by glucose limitation, nitrogen starvation, heat shock, and stationary phase; activity regulated by cAMP-dependent, Snf1p and Pho85p kinases as well as by the Gac1p-Glc7p phosphatase; GSY2 has a paralog, GSY1, that arose from the whole genome duplication; relocalizes from cytoplasm to plasma membrane upon DNA replication stress	1510.43	1.12233	6.02063e-41	6
YGR189C	CRH1	protein_coding	VII	Chitin transglycosylase; functions in the transfer of chitin to beta(1-6) and beta(1-3) glucans in the cell wall; similar and functionally redundant to Utr2; localizes to sites of polarized growth; expression induced by cell wall stress	10428.1	1.11916	2.01609e-56	6
YMR303C	ADH2	protein_coding	XIII	Glucose-repressible alcohol dehydrogenase II; catalyzes the conversion of ethanol to acetaldehyde; involved in the production of certain carboxylate esters; regulated by ADR1	55.3096	1.11725	0.000472205	5
YGL157W	ARI1	protein_coding	VII	NADPH-dependent aldehyde reductase; utilizes aromatic and alophatic aldehyde substrates; member of the short-chain dehydrogenase/reductase superfamily	880.86	1.10818	6.95047e-57	6
YDL124W		protein_coding	IV	NADPH-dependent alpha-keto amide reductase; reduces aromatic alpha-keto amides, aliphatic alpha-keto esters, and aromatic alpha-keto esters; member of the aldo-keto reductase (AKR) family; protein abundance increases in response to DNA replication stress	1183.7	1.10814	9.60266e-45	6
YMR316W	DIA1	protein_coding	XIII	Protein of unknown function; involved in invasive and pseudohyphal growth; green fluorescent protein (GFP)-fusion protein localizes to the cytoplasm in a punctate pattern	151.109	1.10309	4.6499e-10	6
YLR177W		protein_coding	XII	Putative protein of unknown function; phosphorylated by Dbf2p-Mob1p in vitro; some strains contain microsatellite polymophisms at this locus; not an essential gene; YLR177W has a paralog, PSP1, that arose from the whole genome duplication	409.013	1.10119	1.71507e-33	6
YJR119C	JHD2	protein_coding	X	JmjC domain family histone demethylase; promotes global demethylation of H3K4 and repression of noncoding intergenic transcription during sporulation; removes methyl groups added by Set1p methyltransferase; negatively regulated by H3K14 acetylation; protein levels regulated by Not4p polyubiquitin-mediated degradation; regulates sporulation timing by extending period of active transcription in opp…	185.012	1.10086	1.86493e-16	6
YJL161W	FMP33	protein_coding	X	Putative protein of unknown function; the authentic, non-tagged protein is detected in highly purified mitochondria in high-throughput studies	63.9514	1.09863	3.11366e-06	6
YGL006W	PMC1	protein_coding	VII	Vacuolar Ca2+ ATPase involved in depleting cytosol of Ca2+ ions; prevents growth inhibition by activation of calcineurin in the presence of elevated concentrations of calcium; similar to mammalian PMCA1a	1239.11	1.09189	9.69962e-77	6
YOR347C	PYK2	protein_coding	XV	Pyruvate kinase; appears to be modulated by phosphorylation; transcription repressed by glucose, and Pyk2p may be active under low glycolytic flux; PYK2 has a paralog, CDC19, that arose from the whole genome duplication	447.42	1.09144	1.11332e-37	6
YEL059C-A	SOM1	protein_coding	V	Subunit of the mitochondrial inner membrane peptidase (IMP); IMP is required for maturation of mitochondrial proteins of the intermembrane space; Som1p facilitates cleavage of a subset of substrates; contains twin cysteine-x9-cysteine motifs	111.33	1.0895	2.30442e-10	6
YDL181W	INH1	protein_coding	IV	Protein that inhibits ATP hydrolysis by the F1F0-ATP synthase; inhibitory function is enhanced by stabilizing proteins Stf1p and Stf2p; has a calmodulin-binding motif and binds calmodulin in vitro; INH1 has a paralog, STF1, that arose from the whole genome duplication	608.054	1.08931	1.04741e-36	6
YDR096W	GIS1	protein_coding	IV	Histone demethylase and transcription factor; regulates genes during nutrient limitation; activity modulated by proteasome-mediated proteolysis; has JmjC and JmjN domain in N-terminus that interact, promoting stability and proper transcriptional activity; contains two transactivating domains downstream of Jmj domains and a C-terminal DNA binding domain; relocalizes to the cytosol in response to h…	667.608	1.08223	1.35654e-35	6
YDL129W		protein_coding	IV	Protein of unknown function; green fluorescent protein (GFP)-fusion protein localizes to the cytoplasm and the nucleus; YDL129W is not an essential gene; relative distribution to the nucleus increases upon DNA replication stress	182.697	1.07531	1.90809e-16	6
YNL029C	KTR5	protein_coding	XIV	Putative mannosyltransferase involved in protein glycosylation; member of the KRE2/MNT1 mannosyltransferase family; KTR5 has a paralog, KTR7, that arose from the whole genome duplication	296.734	1.07341	4.7594e-33	6
YNL125C	ESBP6	protein_coding	XIV	Protein with similarity to monocarboxylate permeases; appears not to be involved in transport of monocarboxylates such as lactate, pyruvate or acetate across the plasma membrane	860.327	1.07281	3.70629e-39	6
YNR060W	FRE4	protein_coding	XIV	Ferric reductase; reduces a specific subset of siderophore-bound iron prior to uptake by transporters; expression induced by low iron levels	651.32	1.06392	3.59595e-16	6
YKL201C	MNN4	protein_coding	XI	Putative positive regulator of mannosylphosphate transferase Mnn6p; involved in mannosylphosphorylation of N-linked oligosaccharides; expression increases in late-logarithmic and stationary growth phases; coding sequence contains length polymorphisms in different strains; MNN4 has a paralog, YJR061W, that arose from the whole genome duplication	270.036	1.05856	4.09761e-26	6
YDR055W	PST1	protein_coding	IV	Cell wall protein that contains a putative GPI-attachment site; secreted by regenerating protoplasts; up-regulated by activation of the cell integrity pathway, as mediated by Rlm1p; upregulated by cell wall damage via disruption of FKS1; PST1 has a paralog, ECM33, that arose from the whole genome duplication	3735.2	1.05391	5.2324e-82	6
YBR169C	SSE2	protein_coding	II	Member of Hsp110 subclass of the heat shock protein 70 (HSP70) family; serves as nucleotide exchange factor to load ATP onto the SSA class of cytosolic Hsp70s; may be involved in protein folding; localized to the cytoplasm; SSE2 has a paralog, SSE1, that arose from the whole genome duplication	494.857	1.05288	9.75316e-27	6
YOR317W	FAA1	protein_coding	XV	Long chain fatty acyl-CoA synthetase; activates fatty acids with a preference for C12:0-C16:0 chain lengths; role in the competitive import of long-chain fatty acids and sphingoid long-chain bases; accounts for most acyl-CoA synthetase activity; localizes to lipid particles and the plasma membrane; role in sphingolipid-to-glycerolipid metabolism; forms ER foci upon replication stress; faa1 faa4 d…	2789	1.05057	7.28478e-94	6
YKL161C	KDX1	protein_coding	XI	Protein kinase; implicated in Slt2p mitogen-activated (MAP) kinase signaling pathway; interacts with numerous components in the mating pheromone and CWI MAPK pathways; associates with Rlm1p; KDX1 has a paralog, SLT2, that arose from the whole genome duplication	583.573	1.04965	2.57603e-31	6
YNL300W	TOS6	protein_coding	XIV	Glycosylphosphatidylinositol-dependent cell wall protein; expression is periodic and decreases in respone to ergosterol perturbation or upon entry into stationary phase; depletion increases resistance to lactic acid	1462.29	1.0435	4.33199e-23	6
YAR031W	PRM9	protein_coding	I	Pheromone-regulated protein; contains 3 predicted transmembrane segments and an FF sequence, a motif involved in COPII binding; member of DUP240 gene family; PRM9 has a paralog, PRM8, that arose from a segmental duplication	74.5923	1.04312	3.6404e-08	6
YOR009W	TIR4	protein_coding	XV	Cell wall mannoprotein; expressed under anaerobic conditions and required for anaerobic growth; transcription is also induced by cold shock; member of the Srp1p/Tip1p family of serine-alanine-rich proteins	169.455	1.04018	9.14893e-17	6
YPL058C	PDR12	protein_coding	XVI	Plasma membrane ATP-binding cassette (ABC) transporter; weak-acid-inducible multidrug transporter required for weak organic acid resistance; induced by sorbate and benzoate and regulated by War1p; mutants exhibit sorbate hypersensitivity	3731.26	1.03834	2.33168e-20	6
YMR272C	SCS7	protein_coding	XIII	Sphingolipid alpha-hydroxylase; functions in the alpha-hydroxylation of sphingolipid-associated very long chain fatty acids, has both cytochrome b5-like and hydroxylase/desaturase domains, not essential for growth	2420.86	1.03788	1.33944e-49	6
YGR097W	ASK10	protein_coding	VII	Regulator of the Fps1p glycerol channel; under nonstress conditions, binds to Fps1p to positively regulate glycerol transport; under osmotic stress, multiple phosphorylation by Hog1p causes Ask10p to dissociate from Fps1p; forms homodimers and heterodimerizes with paralog Rgc1p; phosphorylated in response to oxidative stress; has a role in destruction of Ssn8p; associates with RNA polymerase II h…	1763.83	1.03613	5.56969e-58	6
YMR055C	BUB2	protein_coding	XIII	Mitotic exit network regulator; forms GTPase-activating Bfa1p-Bub2p complex that binds Tem1p and spindle pole bodies, blocks cell cycle progression before anaphase in response to spindle and kinetochore damage	162.725	1.03519	7.96236e-12	6
YLR120C	YPS1	protein_coding	XII	Aspartic protease; hyperglycosylated member of the yapsin family of proteases, attached to the plasma membrane via a glycosylphosphatidylinositol (GPI) anchor; involved in nutrient limitation-induced cleavage of the extracellular inhibitory domain of signaling mucin Msb2p, resulting in activation of the filamentous growth MAPK pathway; involved with other yapsins in the cell wall integrity respon…	2753.74	1.0347	1.29991e-66	6
YMR020W	FMS1	protein_coding	XIII	Polyamine oxidase; converts spermine to spermidine, which is required for the essential hypusination modification of translation factor eIF-5A; also involved in pantothenic acid biosynthesis	251.746	1.03449	1.6971e-22	6
YDR540C	IRC4	protein_coding	IV	Protein of unknown function; null mutant displays increased levels of spontaneous Rad52p foci; green fluorescent protein (GFP)-fusion protein localizes to the cytoplasm and nucleus	86.7873	1.03005	3.93211e-08	6
YMR031C	EIS1	protein_coding	XIII	Component of the eisosome required for proper eisosome assembly; similar to Uso1p; authentic, non-tagged protein is detected in a phosphorylated state in highly purified mitochondria in high-throughput studies; protein increases in abundance and relocalizes from plasma membrane to cytoplasm upon DNA replication stress; EIS1 has a paralog, YKL050C, that arose from the whole genome duplication	1114.96	1.0251	8.9429e-41	6
YLR251W	SYM1	protein_coding	XII	Protein required for ethanol metabolism; induced by heat shock and localized to the inner mitochondrial membrane; homologous to mammalian peroxisomal membrane protein Mpv17; human homolog MPV17 is implicated in hepatocerebral mtDNA depletion syndromes (MDDS), and complements yeast null mutant	87.6228	1.02435	1.16861e-08	6
YGR065C	VHT1	protein_coding	VII	High-affinity plasma membrane H+-biotin (vitamin H) symporter; mutation results in fatty acid auxotrophy; 12 transmembrane domain containing major facilitator subfamily member; mRNA levels negatively regulated by iron deprivation and biotin	779.868	1.02065	1.41254e-37	6
YMR191W	SPG5	protein_coding	XIII	Protein required for proteasome assembly during quiescence; binds to base of the proteasome regulartory particle; required for survival at high temperature during stationary phase; not required for growth on nonfermentable carbon sources	1174.31	1.02003	4.66562e-33	6
YJL171C	TOH1	protein_coding	X	GPI-anchored cell wall protein of unknown function; induced in response to cell wall damaging agents and by mutations in genes involved in cell wall biogenesis; sequence similarity to YBR162C/TOS1, a covalently bound cell wall protein; protein abundance increases in response to DNA replication stress	3060.88	1.01499	3.53358e-30	6
YNL042W	BOP3	protein_coding	XIV	Protein of unknown function; potential Cdc28p substrate; overproduction confers resistance to methylmercury	205.925	1.01353	3.85182e-08	5
YER035W	EDC2	protein_coding	V	RNA-binding protein that directly activates mRNA decapping; binds mRNA substrate and enhances activity of decapping proteins Dcp1p and Dcp2p; has a role in translation during heat stress; protein increases in abundance and relocalizes to nucleolus and to nuclear foci upon DNA replication stress; EDC2 has a paralog, EDC1, that arose from the whole genome duplication	202.181	1.00163	7.31691e-17	6
YOR315W	SFG1	protein_coding	XV	Nuclear protein putative transcription factor; required for growth of superficial pseudohyphae (which do not invade the agar substrate) but not for invasive pseudohyphal growth; may act together with Phd1p; potential Cdc28p substrate	510.568	-1.00107	4.72608e-33	8
YJL088W	ARG3	protein_coding	X	Ornithine carbamoyltransferase; also known as carbamoylphosphate:L-ornithine carbamoyltransferase; catalyzes the biosynthesis of the arginine precursor citrulline	129.574	-1.02798	4.18582e-07	5
YBL098W	BNA4	protein_coding	II	Kynurenine 3-monooxygenase; required for the de novo biosynthesis of NAD from tryptophan via kynurenine; expression regulated by Hst1p; putative therapeutic target for Huntington disease	229.508	-1.03534	1.15376e-17	8
YKR069W	MET1	protein_coding	XI	S-adenosyl-L-methionine uroporphyrinogen III transmethylase; involved in the biosynthesis of siroheme, a prosthetic group used by sulfite reductase; required for sulfate assimilation and methionine biosynthesis	149.354	-1.05983	1.30692e-15	8
YKL001C	MET14	protein_coding	XI	Adenylylsulfate kinase; required for sulfate assimilation and involved in methionine metabolism; human homolog PAPSS2 complements yeast null mutant	238.216	-1.07577	1.73666e-22	8
YNL142W	MEP2	protein_coding	XIV	Ammonium permease involved in regulation of pseudohyphal growth; belongs to a ubiquitous family of cytoplasmic membrane proteins that transport only ammonium (NH4+); expression is under the nitrogen catabolite repression regulation	647.896	-1.16214	8.47336e-35	8
YHL050C		protein_coding	VIII	Putative protein of unknown function; potential Cdc28p substrate	132.049	-1.19105	1.79398e-13	8
YOR032W-A		protein_coding	XV	Protein of unknown function; SWAT-GFP and seamless-GFP fusion proteins localize to the endoplasmic reticulum; identified by gene-trapping, microarray-based expression analysis, and genome-wide homology searching	79.1722	-1.24314	5.66167e-12	8
YGL009C	LEU1	protein_coding	VII	Isopropylmalate isomerase; catalyzes the second step in the leucine biosynthesis pathway	14448.3	-1.24468	3.56411e-56	8
YLR092W	SUL2	protein_coding	XII	High affinity sulfate permease; sulfate uptake is mediated by specific sulfate transporters Sul1p and Sul2p, which control the concentration of endogenous activated sulfate intermediates	120.961	-1.36271	5.06239e-10	8
YKL120W	OAC1	protein_coding	XI	Mitochondrial inner membrane transporter; transports oxaloacetate, sulfate, thiosulfate, and isopropylmalate; member of the mitochondrial carrier family	1409.11	-1.36554	3.66914e-86	8
YKR039W	GAP1	protein_coding	XI	General amino acid permease; Gap1p senses the presence of amino acid substrates to regulate localization to the plasma membrane when needed; essential for invasive growth	3049.41	-1.36617	1.64517e-28	8
YIR036C	IRC24	protein_coding	IX	Putative benzil reductase;(GFP)-fusion protein localizes to the cytoplasm and is induced by the DNA-damaging agent MMS; sequence similarity with short-chain dehydrogenase/reductases; null mutant has increased spontaneous Rad52p foci	200.512	-1.36923	3.24138e-26	8
YJR025C	BNA1	protein_coding	X	3-hydroxyanthranilic acid dioxygenase; required for the de novo biosynthesis of NAD from tryptophan via kynurenine; expression regulated by Hst1p	255.528	-1.38256	5.59392e-29	5
YPL265W	DIP5	protein_coding	XVI	Dicarboxylic amino acid permease; mediates high-affinity and high-capacity transport of L-glutamate and L-aspartate; also a transporter for Gln, Asn, Ser, Ala, and Gly; relocalizes from plasma membrane to vacuole upon DNA replication stress	1288.92	-1.38398	3.32851e-78	8
YAL067C	SEO1	protein_coding	I	Putative permease; member of the allantoate transporter subfamily of the major facilitator superfamily; mutation confers resistance to ethionine sulfoxide	75.0094	-1.43522	1.62878e-13	5
YER042W	MXR1	protein_coding	V	Methionine-S-sulfoxide reductase; involved in the response to oxidative stress; protects iron-sulfur clusters from oxidative inactivation along with MXR2; involved in the regulation of lifespan; reduced activity of human homolog implicated in Alzheimer disease	215.252	-1.44258	8.89001e-25	8
YFL055W	AGP3	protein_coding	VI	Low-affinity amino acid permease; may act to supply the cell with amino acids as nitrogen source in nitrogen-poor conditions; transcription is induced under conditions of sulfur limitation; plays a role in regulating Ty1 transposition	89.3253	-1.45582	3.3214e-16	8
YCL027W	FUS1	protein_coding	III	Membrane protein localized to the shmoo tip; required for cell fusion; expression regulated by mating pheromone; proposed to coordinate signaling, fusion, and polarization events required for fusion; potential Cdc28p substrate	204.386	-1.71275	8.01188e-10	5
YDR502C	SAM2	protein_coding	IV	S-adenosylmethionine synthetase; catalyzes transfer of the adenosyl group of ATP to the sulfur atom of methionine; comparative analysis suggests that a mitochondrially targeted form may result from translation starting at a non-canonical codon upstream of the annotated start codon	2358.67	-1.88017	1.68502e-217	8
YHL048W	COS8	protein_coding	VIII	Endosomal protein involved in turnover of plasma membrane proteins; member of the DUP380 subfamily of conserved, often subtelomeric COS genes; required for the multivesicular vesicle body sorting pathway that internalizes plasma membrane proteins for degradation; Cos proteins provide ubiquitin in trans for nonubiquitinated cargo proteins	426.99	-1.99887	9.99895e-38	8
YOL058W	ARG1	protein_coding	XV	Arginosuccinate synthetase; catalyzes the formation of L-argininosuccinate from citrulline and L-aspartate in the arginine biosynthesis pathway; potential Cdc28p substrate	513.444	-2.09931	1.24295e-46	5

## Sheet: S649F_alpha vs. WT_alpha
tup1(S649F) a vs. WT a Comparison
Genes with >2-fold change; protein coding only
id	gene_name	biotype	chromosome	description	baseMean	log2FoldChange	padj	Cluster
YNL145W	MFA2	protein_coding	XIV	Mating pheromone a-factor; made by a cells; interacts with alpha cells to induce cell cycle arrest and other responses leading to mating; biogenesis involves C-terminal modification, N-terminal proteolysis, and export; also encoded by MFA1	2422.23	8.42552	2.99721e-146	7
YBR040W	FIG1	protein_coding	II	Integral membrane protein required for efficient mating; may participate in or regulate the low affinity Ca2+ influx system, which affects intracellular signaling and cell-cell fusion during mating	187.297	7.72468	5.37236e-86	4
YGL032C	AGA2	protein_coding	VII	Adhesion subunit of a-agglutinin of a-cells; C-terminal sequence acts as a ligand for alpha-agglutinin (Sag1p) during agglutination, modified with O-linked oligomannosyl chains, linked to anchorage subunit Aga1p via two disulfide bonds	356.71	7.5831	1.47168e-50	7
YJR150C	DAN1	protein_coding	X	Cell wall mannoprotein; has similarity to Tir1p, Tir2p, Tir3p, and Tir4p; expressed under anaerobic conditions, completely repressed during aerobic growth	189.456	7.12428	7.27294e-19	2
YDR461W	MFA1	protein_coding	IV	Mating pheromone a-factor; made by a cells; interacts with alpha cells to induce cell cycle arrest and other responses leading to mating; biogenesis involves C-terminal modification, N-terminal proteolysis, and export; also encoded by MFA2	222.497	7.01405	4.46626e-30	7
YNL279W	PRM1	protein_coding	XIV	Pheromone-regulated multispanning membrane protein; involved in membrane fusion during mating; predicted to have 5 transmembrane segments and a coiled coil domain; localizes to the shmoo tip; regulated by Ste12p	434.234	6.6655	4.85581e-223	4
YGR292W	MAL12	protein_coding	VII	Maltase (alpha-D-glucosidase); inducible protein involved in maltose catabolism; encoded in the MAL1 complex locus; hydrolyzes the disaccharides maltose, turanose, maltotriose, and sucrose	167.429	6.59474	1.34304e-47	2
YAL063C	FLO9	protein_coding	I	Lectin-like protein with similarity to Flo1p; thought to be expressed and involved in flocculation	1094.48	6.53357	0	2
YIL015W	BAR1	protein_coding	IX	Aspartyl protease; secreted into the periplasmic space of mating type a cell; helps cells find mating partners; cleaves and inactivates alpha factor allowing cells to recover from alpha-factor-induced cell cycle arrest	1358.81	6.45041	3.72005e-263	7
YFL026W	STE2	protein_coding	VI	Receptor for alpha-factor pheromone; seven transmembrane-domain GPCR that interacts with both pheromone and a heterotrimeric G protein to initiate the signaling response that leads to mating between haploid a and alpha cells	3092.9	6.39232	0	7
YML058W-A	HUG1	protein_coding	XIII	Ribonucleotide reductase inhibitor; intrinsically disordered protein that binds to and inhibits Rnr2p; involved in the Mec1p-mediated checkpoint pathway; transcription is induced by genotoxic stress and by activation of the Rad53p pathway; protein abundance increases in response to DNA replication stress	444.17	6.32868	2.55303e-237	2
YIL037C	PRM2	protein_coding	IX	Pheromone-regulated protein; predicted to have 4 transmembrane segments and a coiled coil domain; regulated by Ste12p; required for efficient nuclear fusion	74.0654	6.11987	3.12249e-59	5
YMR095C	SNO1	protein_coding	XIII	Protein of unconfirmed function; involved in pyridoxine metabolism; expression is induced during stationary phase; forms a putative glutamine amidotransferase complex with Snz1p, with Sno1p serving as the glutaminase	156.472	6.01654	4.3924e-52	5
YEL070W	DSF1	protein_coding	V	Mannitol dehydrogenase; deletion suppresses mutation of mpt5; DSF1 has a paralog, MAN2, that arose from a segmental duplication	181.339	5.91298	1.3193e-72	2
YKL163W	PIR3	protein_coding	XI	O-glycosylated covalently-bound cell wall protein; required for cell wall stability; expression is cell cycle regulated, peaking in M/G1 and also subject to regulation by the cell integrity pathway; coding sequence contains length polymorphisms in different strains; PIR3 has a paralog, HSP150, that arose from the whole genome duplication	1633.22	5.85354	0	2
YMR279C		protein_coding	XIII	Putative boron transporter involved in boron efflux and resistance; overexpression mutant but not null mutant displays boron tolerance phenotype; identified as a heat-induced gene in a high-throughout screen; YMR279C is not an essential gene; YMR279C has a paralog, ATR1, that arose from the whole genome duplication	225.497	5.83208	2.03691e-126	2
YCR089W	FIG2	protein_coding	III	Cell wall adhesin, expressed specifically during mating; may be involved in maintenance of cell wall integrity during mating; FIG2 has a paralog, AGA1, that arose from the whole genome duplication	1434.61	5.68156	2.66941e-217	4
YIL099W	SGA1	protein_coding	IX	Intracellular sporulation-specific glucoamylase; involved in glycogen degradation; induced during starvation of a/a diploids late in sporulation, but dispensable for sporulation	478.205	5.63107	1.96755e-185	2
YIL160C	POT1	protein_coding	IX	3-ketoacyl-CoA thiolase with broad chain length specificity; cleaves 3-ketoacyl-CoA into acyl-CoA and acetyl-CoA during beta-oxidation of fatty acids	58.2297	5.5072	1.62252e-26	1
YAR050W	FLO1	protein_coding	I	Lectin-like protein involved in flocculation; cell wall protein that binds mannose chains on the surface of other cells, confers floc-forming ability that is chymotrypsin sensitive and heat resistant; important for co-flocculation with other yeasts, mediating interaction with specific species; FLO1 has a paralog, FLO5, that arose from a segmental duplication	753.527	5.47132	3.25857e-253	2
YER011W	TIR1	protein_coding	V	Cell wall mannoprotein; expression is downregulated at acidic pH and induced by cold shock and anaerobiosis; abundance is increased in cells cultured without shaking; member of the Srp1p/Tip1p family of serine-alanine-rich proteins	1137.89	5.47109	0	2
YMR317W		protein_coding	XIII	Putative protein of unknown function; has some similarity to sialidase from Trypanosoma; YMR317W is not an essential gene	313.42	5.26134	6.69759e-150	2
YJR047C	ANB1	protein_coding	X	Translation elongation factor eIF-5A; previously thought to function in translation initiation; undergoes an essential hypusination modification; expressed under anaerobic conditions; ANB1 has a paralog, HYP2, that arose from the whole genome duplication; human EIF5A complements the inviability of the yeast hyp2 anb1 double null mutant	586.13	5.23479	8.43278e-251	2
YDR034W-B		protein_coding	IV	Predicted tail-anchored plasma membrane protein; contains conserved CYSTM module; related proteins in other organisms may be involved in response to stress; N- and C-terminal fusion proteins localize to the cell periphery; YDR034W-B has a paralog, YBR056W-A, that arose from the whole genome duplication	79.64	5.17619	5.44612e-46	1
YOR178C	GAC1	protein_coding	XV	Regulatory subunit for Glc7p type-1 protein phosphatase (PP1); tethers Glc7p to Gsy2p glycogen synthase, binds Hsf1p heat shock transcription factor, required for induction of some HSF-regulated genes under heat shock; GAC1 has a paralog, PIG1, that arose from the whole genome duplication	772.706	5.17507	2.6925e-197	2
YIL066C	RNR3	protein_coding	IX	Minor isoform of large subunit of ribonucleotide-diphosphate reductase; the RNR complex catalyzes rate-limiting step in dNTP synthesis, regulated by DNA replication and DNA damage checkpoint pathways via localization of small subunits; RNR3 has a paralog, RNR1, that arose from the whole genome duplication	1186.82	5.09761	0	2
YFL053W	DAK2	protein_coding	VI	Dihydroxyacetone kinase; required for detoxification of dihydroxyacetone (DHA); involved in stress adaptation	127.062	5.07072	1.1758e-28	2
YGR138C	TPO2	protein_coding	VII	Polyamine transporter of the major facilitator superfamily; member of the 12-spanner drug:H(+) antiporter DHA1 family; specific for spermine; localizes to the plasma membrane; transcription of TPO2 is regulated by Haa1p; TPO2 has a paralog, TPO3, that arose from the whole genome duplication	1421.18	5.06745	0	2
YJL052W	TDH1	protein_coding	X	Glyceraldehyde-3-phosphate dehydrogenase (GAPDH), isozyme 1; involved in glycolysis and gluconeogenesis; tetramer that catalyzes the reaction of glyceraldehyde-3-phosphate to 1,3 bis-phosphoglycerate; detected in the cytoplasm and cell wall; protein abundance increases in response to DNA replication stress; GAPDH-derived antimicrobial peptides secreted by S. cerevisiae are active against a wide v…	2058.5	5.04158	0	2
YGL158W	RCK1	protein_coding	VII	Protein kinase involved in oxidative stress response; promotes pseudohyphal growth via activation of Ubp3p phosphorylation; identified as suppressor of S. pombe cell cycle checkpoint mutations; RCK1 has a paralog, RCK2, that arose from the whole genome duplication	239.522	5.01398	6.64681e-99	2
YFL014W	HSP12	protein_coding	VI	Plasma membrane protein involved in maintaining membrane organization; involved in maintaining organization during stress conditions; induced by heat shock, oxidative stress, osmostress, stationary phase, glucose depletion, oleate and alcohol; protein abundance increased in response to DNA replication stress and dietary restriction; regulated by the HOG and Ras-Pka pathways; required for dietary …	669.751	4.97709	1.05966e-98	2
YOL157C	IMA2	protein_coding	XV	Isomaltase (alpha-1,6-glucosidase/alpha-methylglucosidase); preferred specificity for isomaltose, alpha-methylglucoside, and palatinose, but also exhibits alpha-1,2 glucosidase activity on sucrose and kojibiose, and can cleave the 1,3-alpha linkage of nigerose and turanose and the alpha-1,5 linkage of leucrose in vitro; not required for isomaltose utilization, but Ima2p overexpression allows the …	190.063	4.77778	6.08717e-133	2
YGR066C		protein_coding	VII	Putative protein of unknown function	66.449	4.72169	1.70506e-51	1
YBR301W	PAU24	protein_coding	II	Cell wall mannoprotein; has similarity to Tir1p, Tir2p, Tir3p, and Tir4p; member of the seripauperin multigene family encoded mainly in subtelomeric regions; expressed under anaerobic conditions, completely repressed during aerobic growth	54.2974	4.67728	4.77728e-41	1
YNR044W	AGA1	protein_coding	XIV	Anchorage subunit of a-agglutinin of a-cells; highly O-glycosylated protein with N-terminal secretion signal and C-terminal signal for addition of GPI anchor to cell wall, linked to adhesion subunit Aga2p via two disulfide bonds; AGA1 has a paralog, FIG2, that arose from the whole genome duplication	695.408	4.51829	1.43378e-131	4
YGR213C	RTA1	protein_coding	VII	Protein involved in 7-aminocholesterol resistance; has seven potential membrane-spanning regions; expression is induced under both low-heme and low-oxygen conditions; member of the fungal lipid-translocating exporter (LTE) family of protein; RTA1 has a paralog, YLR046C, that arose from the whole genome duplication	166.253	4.51602	2.92321e-96	1
YJL116C	NCA3	protein_coding	X	Protein involved in mitochondrion organization; functions with Nca2p to regulate mitochondrial expression of subunits 6 (Atp6p) and 8 (Atp8p) of the Fo-F1 ATP synthase; SWAT-GFP, seamless-GFP and mCherry fusion proteins localize to the vacuole; member of the SUN family; expression induced in cells treated with the mycotoxin patulin; NCA3 has a paralog, UTH1, that arose from the whole genome dupli…	216.881	4.45829	3.64862e-114	2
YBR054W	YRO2	protein_coding	II	Protein with a putative role in response to acid stress; null mutant is sensitive to acetic acid; transcription is regulated by Haa1p and induced in the presence of acetic acid; protein observed in plasma membrane foci in the presence of acetic acid; the authentic, non-tagged protein is detected in a phosphorylated state in highly purified mitochondria in high-throughput studies	776.119	4.45625	5.22693e-266	2
YIL101C	XBP1	protein_coding	IX	Transcriptional repressor; binds promoter sequences of cyclin genes, CYS3, and SMF2; not expressed during log phase of growth, but induced by stress or starvation during mitosis, and late in meiosis; represses 15% of all yeast genes as cells transition to quiescence; important for maintaining G1 arrest and for longevity of quiescent cells; member of Swi4p/Mbp1p family; phosphorylated by Cdc28p; r…	257.241	4.44663	9.9847e-96	1
YBR201C-A		protein_coding	II	Putative protein of unknown function	324.953	4.36283	3.97674e-229	2
YIL011W	TIR3	protein_coding	IX	Cell wall mannoprotein; member of Srp1p/Tip1p family of serine-alanine-rich proteins; expressed under anaerobic conditions and required for anaerobic growth; TIR3 has a paralog, TIR2, that arose from the whole genome duplication	686.734	4.32566	0	2
YLL055W	YCT1	protein_coding	XII	High-affinity cysteine-specific transporter; has similarity to the Dal5p family of transporters; green fluorescent protein (GFP)-fusion protein localizes to the endoplasmic reticulum; YCT1 is not an essential gene	751.715	4.27361	0	2
YMR206W		protein_coding	XIII	Putative protein of unknown function; not an essential gene; YMR206W has a paralog, YNR014W, that arose from the whole genome duplication	59.9281	4.268	1.76444e-43	1
YKL209C	STE6	protein_coding	XI	Plasma membrane ATP-binding cassette (ABC) transporter; required for the export of a-factor, catalyzes ATP hydrolysis coupled to a-factor transport; contains 12 transmembrane domains and two ATP binding domains; expressed only in MATa cells; human homolog ABCB1 mediates multidrug resistance in many chemotherapy-resistant tumors by effluxing toxic compounds from the cell	2309.84	4.12589	0	7
YDL085W	NDE2	protein_coding	IV	Mitochondrial external NADH dehydrogenase; catalyzes the oxidation of cytosolic NADH; Nde1p and Nde2p are involved in providing the cytosolic NADH to the mitochondrial respiratory chain; NDE2 has a paralog, NDE1, that arose from the whole genome duplication	112.454	4.11613	2.17325e-61	1
YJL214W	HXT8	protein_coding	X	Protein of unknown function with similarity to hexose transporters; expression is induced by low levels of glucose and repressed by high levels of glucose	233.972	4.11073	1.50288e-122	2
YER096W	SHC1	protein_coding	V	Sporulation-specific activator of Chs3p (chitin synthase III); required for the synthesis of the chitosan layer of ascospores; transcriptionally induced at alkaline pH; SHC1 has a paralog, SKT5, that arose from the whole genome duplication	373.381	4.0789	2.72492e-259	2
YGR144W	THI4	protein_coding	VII	Thiazole synthase; abundant protein involved in the formation of the thiazole moiety of thiamine during thiamine biosynthesis; acts more as a co-substrate rather than an enzyme by providing the sulphur source for thiazole formation; undergoes a single turnover only; required for mitochondrial genome stability in response to DNA damaging agents	89.5409	4.03056	2.51409e-62	1
YER150W	SPI1	protein_coding	V	GPI-anchored cell wall protein involved in weak acid resistance; basal expression requires Msn2p/Msn4p; expression is induced under conditions of stress and during the diauxic shift; SPI1 has a paralog, SED1, that arose from the whole genome duplication	436.857	3.95176	5.26647e-139	2
YOL084W	PHM7	protein_coding	XV	Protein of unknown function; expression is regulated by phosphate levels; green fluorescent protein (GFP)-fusion protein localizes to the cell periphery and vacuole; protein abundance increases in response to DNA replication stress	471.402	3.94463	2.5922e-72	2
YBR072W	HSP26	protein_coding	II	Small heat shock protein (sHSP) with chaperone activity; forms hollow, sphere-shaped oligomers that suppress unfolded proteins aggregation; long-lived protein that is preferentially retained in mother cells and forms cytoplasmic foci; oligomer activation requires heat-induced conformational change; also has mRNA binding activity	236.538	3.92614	6.22629e-37	2
YOR134W	BAG7	protein_coding	XV	Rho GTPase activating protein (RhoGAP); stimulates the intrinsic GTPase activity of Rho1p, which plays a bud growth by regulating actin cytoskeleton organization and cell wall biosynthesis, resulting in the downregulation of Rho1p; structurally and functionally related to Sac7p; BAG7 has a paralog, SAC7, that arose from the whole genome duplication	82.5735	3.8632	9.69469e-59	1
YPR160W	GPH1	protein_coding	XVI	Glycogen phosphorylase required for the mobilization of glycogen; non-essential; regulated by cyclic AMP-mediated phosphorylation; phosphorylation by Cdc28p may coordinately regulate carbohydrate metabolism and the cell cycle; expression is regulated by stress-response elements and by the HOG MAP kinase pathway	3229.52	3.85998	7.07836e-224	2
YIL169C		protein_coding	IX	Protein of unknown function, secreted when constitutively expressed; SWAT-GFP, seamless-GFP and mCherry fusion proteins localize to the cell periphery, SWAT-GFP fusion also localizes to the extracellular region, and mCherry fusion also localizes to the vacuole; S/T rich and highly similar to YOL155C, a putative glucan alpha-1,4-glucosidase; transcript is induced in both high and low pH environmen…	61.7059	3.84853	4.70237e-50	5
YLR327C	TMA10	protein_coding	XII	Protein of unknown function that associates with ribosomes; protein abundance increases in response to DNA replication stress; TMA10 has a paralog, STF2, that arose from the whole genome duplication	311.962	3.84552	4.25803e-97	1
YOR010C	TIR2	protein_coding	XV	Putative cell wall mannoprotein; member of the Srp1p/Tip1p family of serine-alanine-rich proteins; transcription is induced by cold shock and anaerobiosis; TIR2 has a paralog, TIR3, that arose from the whole genome duplication	204.565	3.79365	1.24585e-126	2
YKR097W	PCK1	protein_coding	XI	Phosphoenolpyruvate carboxykinase; key enzyme in gluconeogenesis, catalyzes early reaction in carbohydrate biosynthesis, glucose represses transcription and accelerates mRNA degradation, regulated by Mcm1p and Cat8p, located in the cytosol	186.343	3.78987	1.54281e-75	1
YNL270C	ALP1	protein_coding	XIV	Arginine transporter; expression is normally very low and it is unclear what conditions would induce significant expression; ALP1 has a paralog, CAN1, that arose from the whole genome duplication	119.175	3.72096	5.88552e-73	1
YDR533C	HSP31	protein_coding	IV	Methylglyoxalase that converts methylglyoxal to D-lactate; involved in oxidative stress resistance, diauxic shift, and stationary phase survival; has similarity to E. coli Hsp31 and C. albicans Glx3p; member of the DJ-1/ThiJ/PfpI superfamily, which includes human DJ-1 involved in Parkinson's disease and cancer; exists as a dimer and contains a putative metal-binding site; protein abundance increa…	731.2	3.68618	5.75197e-255	1
YPL171C	OYE3	protein_coding	XVI	Conserved NADPH oxidoreductase containing flavin mononucleotide (FMN); homologous to Oye2p with different ligand binding and catalytic properties; has potential roles in oxidative stress response and programmed cell death	136.95	3.68164	2.12342e-60	1
YLR267W	BOP2	protein_coding	XII	Protein of unknown function	166.162	3.64071	2.49317e-109	1
YBR147W	RTC2	protein_coding	II	Putative vacuolar membrane transporter for cationic amino acids; likely contributes to amino acid homeostasis by exporting cationic amino acids from the vacuole; positive regulation by Lys14p suggests that lysine may be the primary substrate; member of the PQ-loop family, with seven transmembrane domains; similar to mammalian PQLC2 vacuolar transporter; RTC2 has a paralog, YPQ1, that arose from t…	57.5465	3.639	3.32015e-49	5
YIL013C	PDR11	protein_coding	IX	ATP-binding cassette (ABC) transporter; multidrug transporter involved in multiple drug resistance; mediates sterol uptake when sterol biosynthesis is compromised; regulated by Pdr1p; required for anaerobic growth; PDR11 has a paralog, AUS1, that arose from the whole genome duplication	923.147	3.63417	0	1
YLL053C		protein_coding	XII	Putative protein; in the Sigma 1278B strain background YLL053C is contiguous with AQY2 which encodes an aquaporin	213.952	3.61489	1.45795e-80	1
YOL052C-A	DDR2	protein_coding	XV	Multi-stress response protein; expression is activated by a variety of xenobiotic agents and environmental or physiological stresses; DDR2 has a paralog, HOR7, that arose from the whole genome duplication	205.321	3.60825	7.29835e-28	2
YMR096W	SNZ1	protein_coding	XIII	Protein involved in vitamin B6 biosynthesis; member of a stationary phase-induced gene family; coregulated with SNO1; interacts with Sno1p and with Yhr198p, perhaps as a multiprotein complex containing other Snz and Sno proteins	1136.5	3.5892	9.46405e-208	5
YPR192W	AQY1	protein_coding	XVI	Spore-specific water channel; mediates the transport of water across cell membranes, developmentally controlled; may play a role in spore maturation, probably by allowing water outflow, may be involved in freeze tolerance	133.81	3.57078	4.67952e-40	2
YBR117C	TKL2	protein_coding	II	Transketolase; catalyzes conversion of xylulose-5-phosphate and ribose-5-phosphate to sedoheptulose-7-phosphate and glyceraldehyde-3-phosphate in the pentose phosphate pathway; needed for synthesis of aromatic amino acids; TKL2 has a paralog, TKL1, that arose from the whole genome duplication	213.678	3.55798	2.32175e-30	2
YJL216C	IMA5	protein_coding	X	Alpha-glucosidase; specificity for isomaltose, maltose, and palatinose, but not alpha-methylglucoside; most distant member of the IMA isomaltase family, but with similar catalytic properties as Ima1p and Ima2p; not required for isomaltose utilization, but Ima5p overexpression allows the ima1 null mutant to grow on isomaltose; can cleave alpha-1,3 linkage of nigerose and turanose and alpha-1,5 lin…	201.986	3.54864	1.28276e-114	1
YPR005C	HAL1	protein_coding	XVI	Cytoplasmic protein involved in halotolerance; decreases intracellular Na+ (via Ena1p) and increases intracellular K+ by decreasing efflux; expression repressed by Ssn6p-Tup1p and Sko1p and induced by NaCl, KCl, and sorbitol through Gcn4p	317.116	3.48857	1.07157e-194	1
YER185W	PUG1	protein_coding	V	Plasma membrane protein involved in protoprophyrin and heme transport; roles in the uptake of protoprophyrin IX and the efflux of heme; expression is induced under both low-heme and low-oxygen conditions; member of the fungal lipid-translocating exporter (LTE) family of proteins	52.8811	3.48314	1.22929e-53	5
YOR382W	FIT2	protein_coding	XV	Mannoprotein that is incorporated into the cell wall; incorporated via a glycosylphosphatidylinositol (GPI) anchor; involved in the retention of siderophore-iron in the cell wall	763.108	3.47071	5.72914e-35	2
YDL214C	PRR2	protein_coding	IV	Serine/threonine protein kinase; inhibits pheromone induced signalling downstream of MAPK, possibly at the level of the Ste12p transcription factor; mutant has increased aneuploidy tolerance; PRR2 has a paralog, NPR1, that arose from the whole genome duplication	143.678	3.4655	1.50463e-84	1
YPR015C		protein_coding	XVI	Putative zinc finger transcription factor; binds DNA in sequence-specific manner; overexpression causes a cell cycle delay or arrest	96.6785	3.46049	9.15245e-61	1
YMR232W	FUS2	protein_coding	XIII	Cell fusion regulator; cytoplasmic protein localized to shmoo tip; required for alignment of parental nuclei before nuclear fusion during mating; contains a Dbl-homology domain; binds specifically with activated Cdc42p	98.0851	3.44782	1.25083e-63	5
YMR173W	DDR48	protein_coding	XIII	DNA damage-responsive protein; expression is increased in response to heat-shock stress or treatments that produce DNA lesions; contains multiple repeats of the amino acid sequence NNNDSYGS; protein abundance increases in response to DNA replication stress	1470.62	3.43259	0	1
YDR403W	DIT1	protein_coding	IV	Sporulation-specific enzyme required for spore wall maturation; involved in the production of a soluble LL-dityrosine-containing precursor of the spore wall; transcripts accumulate at the time of prospore enclosure	170.874	3.41433	8.26269e-78	1
YGR052W	FMP48	protein_coding	VII	Putative protein of unknown function; the authentic, non-tagged protein is detected in highly purified mitochondria in high-throughput studies; induced by treatment with 8-methoxypsoralen and UVA irradiation	84.998	3.40715	4.65275e-53	1
YMR120C	ADE17	protein_coding	XIII	Enzyme of 'de novo' purine biosynthesis; contains both 5-aminoimidazole-4-carboxamide ribonucleotide transformylase and inosine monophosphate cyclohydrolase activities; ADE17 has a paralog, ADE16, that arose from the whole genome duplication; ade16 ade17 mutants require adenine and histidine	1388.65	3.40691	0	2
YPL277C		protein_coding	XVI	Putative protein of unknown function; localized to the membranes; gene expression regulated by copper levels	167.158	3.39036	5.95614e-98	1
YCL026C-B	HBN1	protein_coding	III	Protein of unknown function; similar to bacterial nitroreductases; green fluorescent protein (GFP)-fusion protein localizes to the cytoplasm and nucleus; protein becomes insoluble upon intracellular iron depletion; protein abundance increases in response to DNA replication stress	219.889	3.35501	1.9733e-110	1
YNL194C		protein_coding	XIV	Integral membrane protein; required for sporulation and plasma membrane sphingolipid content; similar to SUR7; GFP-fusion protein is induced in response to the DNA-damaging agent MMS; GFP-fusion protein is more abundant at MCCs (membrane compartment occupied by Can1) in the presence of glycerol and oleate; YNL194C has a paralog, FMP45, that arose from the whole genome duplication	115.134	3.3366	4.3647e-15	2
YGR032W	GSC2	protein_coding	VII	Catalytic subunit of 1,3-beta-glucan synthase; involved in formation of the inner layer of the spore wall; activity positively regulated by Rho1p and negatively by Smk1p; GSC2 has a paralog, FKS1, that arose from the whole genome duplication	6339.13	3.33122	0	1
YBR067C	TIP1	protein_coding	II	Major cell wall mannoprotein with possible lipase activity; transcription is induced by heat- and cold-shock; member of the Srp1p/Tip1p family of serine-alanine-rich proteins	2023.45	3.30566	0	2
YML131W		protein_coding	XIII	Protein of unknown function; similar to medium chain dehydrogenase/reductases; expression induced by stresses including osmotic shock, DNA damaging agents, and other chemicals; GFP-fusion protein localizes to the cytoplasm; protein abundance increases in response to DNA replication stress	891.826	3.29314	5.71339e-297	1
YGR043C	NQM1	protein_coding	VII	Transaldolase of unknown function; transcription is repressed by Mot1p and induced by alpha-factor and during diauxic shift; NQM1 has a paralog, TAL1, that arose from the whole genome duplication	65.1332	3.27159	7.28165e-33	1
YOR389W		protein_coding	XV	Putative protein of unknown function; expression regulated by copper levels	370.484	3.2705	3.69937e-198	1
YAL064C-A	TDA8	protein_coding	I	Putative protein of unknown function; null mutant is sensitive to expression of the top1-T722A allele; not an essential gene	54.7347	3.26591	1.99616e-25	1
YBL049W	MOH1	protein_coding	II	Protein of unknown function, essential for stationary phase survival; not required for growth on nonfermentable carbon sources; possibly linked with vacuolar transport	66.5821	3.22027	4.77717e-27	6
YCL027W	FUS1	protein_coding	III	Membrane protein localized to the shmoo tip; required for cell fusion; expression regulated by mating pheromone; proposed to coordinate signaling, fusion, and polarization events required for fusion; potential Cdc28p substrate	204.386	3.20084	5.69744e-45	5
YJL218W		protein_coding	X	Putative acetyltransferase; similar to bacterial galactoside O-acetyltransferases; induced by oleate in an OAF1/PIP2-dependent manner; promoter contains an oleate response element consensus sequence; non-essential gene	69.2583	3.1888	1.73557e-45	1
YGR243W	MPC3	protein_coding	VII	Highly conserved subunit of the mitochondrial pyruvate carrier (MPC); expressed during growth on nonfermentable carbon sources, and heterodimerizes with Mpc1p to form the respiratory isoform of MPC; MPC localizes to the mitochondrial inner membrane and mediates pyruvate uptake; MPC3 paralog, MPC2, heterodimerizes with Mpc1p to form the fermentative MPC isoform; protein abundance increases in resp…	104.615	3.13699	8.95184e-58	1
YLL052C	AQY2	protein_coding	XII	Water channel that mediates water transport across cell membranes; only expressed in proliferating cells; controlled by osmotic signals; may be involved in freeze tolerance; disrupted by a stop codon in many S. cerevisiae strains	165.5	3.09783	3.42214e-63	1
YGR088W	CTT1	protein_coding	VII	Cytosolic catalase T; has a role in protection from oxidative damage by hydrogen peroxide	369.26	3.07745	2.33646e-40	2
YGL121C	GPG1	protein_coding	VII	Proposed gamma subunit of the heterotrimeric G protein; interacts with the receptor Gpr1p; involved in regulation of pseudohyphal growth; requires Gpb1p or Gpb2p to interact with Gpa2p; overproduction causes prion curing	52.2948	3.05165	1.83687e-30	6
YEL011W	GLC3	protein_coding	V	Glycogen branching enzyme, involved in glycogen accumulation; green fluorescent protein (GFP)-fusion protein localizes to the cytoplasm in a punctate pattern; relocalizes from nucleus to cytoplasmic foci upon DNA replication stress; glycogen accumulation defect of the null mutant is functionally complemented by human GBE1, which is associated with glycogen storage disease	1041.32	3.03535	5.80802e-129	1
YDR342C	HXT7	protein_coding	IV	High-affinity glucose transporter; member of the major facilitator superfamily, nearly identical to Hxt6p, expressed at high basal levels relative to other HXTs, expression repressed by high glucose levels; HXT7 has a paralog, HXT4, that arose from the whole genome duplication	430.824	3.01284	5.39526e-50	1
YNR014W		protein_coding	XIV	Putative protein of unknown function; expression is cell-cycle regulated, Azf1p-dependent, and heat-inducible; YNR014W has a paralog, YMR206W, that arose from the whole genome duplication	129.213	2.98536	4.69837e-60	1
YDR119W-A	COX26	protein_coding	IV	Stabilizes or regulates formation of respiratory chain supercomplexes composed of Complex III (ubiquinol-cytochrome c reductase) and Complex IV (cytochrome c oxidase)	135.888	2.97055	8.41323e-53	1
YGR248W	SOL4	protein_coding	VII	6-phosphogluconolactonase; protein abundance increases in response to DNA replication stress; SOL4 has a paralog, SOL3, that arose from the whole genome duplication	64.1721	2.96615	9.06275e-24	1
YPL156C	PRM4	protein_coding	XVI	Pheromone-regulated protein proposed to be involved in mating; predicted to have 1 transmembrane segment; transcriptionally regulated by Ste12p during mating and by Cat8p during the diauxic shift	114.964	2.95108	4.735e-71	5
YHL024W	RIM4	protein_coding	VIII	Putative RNA-binding protein; required for the expression of early and middle sporulation genes	262.838	2.94994	7.90711e-89	1
YJR004C	SAG1	protein_coding	X	Alpha-agglutinin of alpha-cells; binds to Aga1p during agglutination, N-terminal half is homologous to the immunoglobulin superfamily and contains binding site for a-agglutinin, C-terminal half is highly glycosylated and contains GPI anchor	6171.46	2.94341	4.40013e-187	4
YDR124W		protein_coding	IV	Putative protein of unknown function; non-essential gene; expression is strongly induced by alpha factor	69.5627	2.93358	2.91118e-45	5
YPL054W	LEE1	protein_coding	XVI	Zinc-finger protein of unknown function	117.746	2.93234	5.9723e-50	1
YGR287C	IMA1	protein_coding	VII	Major isomaltase (alpha-1,6-glucosidase/alpha-methylglucosidase); required for isomaltose utilization; preferred specificity for isomaltose, alpha-methylglucoside, and palatinose, but also exhibits alpha-1,2 glucosidase activity on sucrose and kojibiose, and can cleave the 1,3-alpha linkage of nigerose and turanose and the alpha-1,5 linkage of leucrose in vitro; member of the IMA isomaltase family	217.003	2.93187	2.59664e-95	1
YBR182C	SMP1	protein_coding	II	MADS-box transcription factor involved in osmotic stress response; SMP1 has a paralog, RLM1, that arose from the whole genome duplication	256.495	2.92361	3.23005e-121	1
YIL121W	QDR2	protein_coding	IX	Plasma membrane transporter of the major facilitator superfamily; member of the 12-spanner drug:H(+) antiporter DHA1 family; exports copper; has broad substrate specificity and can transport many mono- and divalent cations; transports a variety of drugs and is required for resistance to quinidine, barban, cisplatin, and bleomycin; contributes to potassium homeostasis; expression is regulated by c…	480.949	2.9209	5.45293e-184	1
YKL093W	MBR1	protein_coding	XI	Protein involved in mitochondrial functions and stress response; overexpression suppresses growth defects of hap2, hap3, and hap4 mutants; MBR1 has a paralog, ISF1, that arose from the whole genome duplication	164.674	2.91702	8.78102e-51	1
YPL092W	SSU1	protein_coding	XVI	Plasma membrane sulfite pump involved in sulfite metabolism; required for efficient sulfite efflux; major facilitator superfamily protein	356.336	2.89351	2.68687e-115	1
YIL014C-A	YIL014C-A	protein_coding	IX	Putative protein of unknown function	59.3239	2.88042	2.21951e-34	6
YBL043W	ECM13	protein_coding	II	Non-essential protein of unknown function; induced by treatment with 8-methoxypsoralen and UVA irradiation; ECM13 has a paralog, YJR115W, that arose from the whole genome duplication	122.819	2.86724	2.0484e-31	6
YPL230W	USV1	protein_coding	XVI	Putative transcription factor containing a C2H2 zinc finger; mutation affects transcriptional regulation of genes involved in growth on non-fermentable carbon sources, response to salt stress and cell wall biosynthesis; USV1 has a paralog, RGM1, that arose from the whole genome duplication	74.6359	2.85289	4.89052e-29	1
YDL222C	FMP45	protein_coding	IV	Integral membrane protein localized to mitochondria; required for sporulation and maintaining sphingolipid content; similar to SUR7; FMP45 has a paralog, YNL194C, that arose from the whole genome duplication	392.345	2.84067	4.97313e-22	2
YMR303C	ADH2	protein_coding	XIII	Glucose-repressible alcohol dehydrogenase II; catalyzes the conversion of ethanol to acetaldehyde; involved in the production of certain carboxylate esters; regulated by ADR1	55.3096	2.83893	3.85585e-22	5
YOL055C	THI20	protein_coding	XV	Trifunctional enzyme of thiamine biosynthesis, degradation and salvage; has hydroxymethylpyrimidine (HMP) kinase, HMP-phosphate (HMP-P) kinase and thiaminase activities; member of a gene family with THI21 and THI22; HMP and HMP-P kinase activity redundant with Thi21p	427.123	2.83354	3.07495e-167	1
YCR098C	GIT1	protein_coding	III	Plasma membrane permease; mediates uptake of glycerophosphoinositol and glycerophosphocholine as sources of the nutrients inositol and phosphate; expression and transport rate are regulated by phosphate and inositol availability	1593.45	2.80621	3.19903e-69	2
YKL217W	JEN1	protein_coding	XI	Monocarboxylate/proton symporter of the plasma membrane; transport activity is dependent on the pH gradient across the membrane; mediates high-affinity uptake of carbon sources lactate, pyuvate, and acetate, and also of the micronutrient selenite, whose structure mimics that of monocarboxylates; expression and localization are tightly regulated, with transcription repression, mRNA degradation, an…	252.359	2.79337	1.70936e-15	1
YKR102W	FLO10	protein_coding	XI	Member of the FLO family of cell wall flocculation proteins; not expressed in most lab strains; overproduction induces flocculation that can be inhibited by mannose, sucrose, or glucose; overproduction also promotes haploid invasive growth and diploid filamentous growth	592.958	2.78434	1.26662e-204	1
YER054C	GIP2	protein_coding	V	Putative regulatory subunit of protein phosphatase Glc7p; involved in glycogen metabolism; contains a conserved motif (GVNK motif) that is also found in Gac1p, Pig1p, and Pig2p; GIP2 has a paralog, PIG2, that arose from the whole genome duplication	114.459	2.7802	4.28635e-51	1
YJR094C	IME1	protein_coding	X	Master regulator of meiosis that is active only during meiotic events; activates transcription of early meiotic genes through interaction with Ume6p; degraded by the 26S proteasome following phosphorylation by Ime2p; transcription is negatively regulated in cis by the IRT1 long noncoding antisense RNA	50.8854	2.77735	1.90956e-35	6
YBR240C	THI2	protein_coding	II	Transcriptional activator of thiamine biosynthetic genes; interacts with regulatory factor Thi3p to control expression of thiamine biosynthetic genes with respect to thiamine availability; acts together with Pdc2p to respond to thiaminediphosphate demand, possibly as related to carbon source availability; zinc finger protein of the Zn(II)2Cys6 type	94.8115	2.75941	9.57128e-46	6
YDR098C	GRX3	protein_coding	IV	Glutathione-dependent oxidoreductase; hydroperoxide and superoxide-radical responsive; monothiol glutaredoxin subfamily member along with Grx4p and Grx5p; protects cells from oxidative damage; with Grx4p, binds to Aft1p in iron-replete conditions, promoting its dissociation from promoters; evidence exists indicating that the translation start site is not Met1 as currently annotated, but rather Me…	755.681	2.73943	2.94508e-140	5
YIL120W	QDR1	protein_coding	IX	Multidrug transporter of the major facilitator superfamily; member of the 12-spanner drug:H(+) antiporter DHA1 family; involved in spore wall assembly; sequence similarity to DTR1 and QDR3, and the triple mutant dtr1 qdr1 qdr3 exhibits reduced dityrosine fluorescence relative to the single mutants; required for resistance to quinidine, ketoconazole, fluconazole, and barban; QDR1 has a paralog, AQ…	162.983	2.73874	4.31332e-81	1
YPL189W	GUP2	protein_coding	XVI	Probable membrane protein; possible role in proton symport of glycerol; member of the MBOAT family of putative membrane-bound O-acyltransferases; homolog of the mammalian Hedgehog pathway modulator HHAT; GUP2 has a paralog, GUP1, that arose from the whole genome duplication	169.735	2.73744	6.81392e-77	1
YIR019C		protein_coding	IX	GPI-anchored cell surface glycoprotein (flocculin); required for pseudohyphal and invasive growth, flocculation, and biofilm formation; major determinant of colony morphology; transcription regulated by the MAPK pathway (Ste12p and Tec1p) and the cAMP pathway (Flo8p); required for formation of fibrous interconnections between cells of a wild strain; role in co-flocculation with other yeast specie…	160.765	2.72093	3.3982e-44	1
YLR042C		protein_coding	XII	Cell wall protein of unknown function; localizes to the cytoplasm; deletion improves xylose fermentation in industrially engineered strains; YLR042C is not an essential gene	198.647	2.71983	2.55661e-70	5
YDL223C	HBT1	protein_coding	IV	Shmoo tip protein, substrate of Hub1p ubiquitin-like protein; mutants are defective for mating projection formation, thereby implicating Hbt1p in polarized cell morphogenesis; HBT1 has a paralog, YNL195C, that arose from the whole genome duplication	488.384	2.70263	5.77748e-94	1
YLR121C	YPS3	protein_coding	XII	Aspartic protease; member of the yapsin family of proteases involved in cell wall growth and maintenance; attached to the plasma membrane via a glycosylphosphatidylinositol (GPI) anchor	1674.01	2.69836	1.92317e-270	1
YBR183W	YPC1	protein_coding	II	Alkaline ceramidase; also has reverse (CoA-independent) ceramide synthase activity; catalyzes both breakdown and synthesis of phytoceramide; overexpression confers fumonisin B1 resistance; YPC1 has a paralog, YDC1, that arose from the whole genome duplication	345.75	2.6886	6.61976e-91	1
YLR237W	THI7	protein_coding	XII	Plasma membrane transporter responsible for the uptake of thiamine; contributes to uptake of 5-aminoimidazole-4-carboxamide-1-beta-D-ribofuranoside (acadesine); member of the major facilitator superfamily of transporters; mutation of human ortholog causes thiamine-responsive megaloblastic anemia	1580.84	2.68798	7.51626e-208	1
YJL089W	SIP4	protein_coding	X	C6 zinc cluster transcriptional activator; binds to the carbon source-responsive element (CSRE) of gluconeogenic genes; involved in the positive regulation of gluconeogenesis; regulated by Snf1p protein kinase; localized to the nucleus	107.964	2.68793	7.08993e-35	6
YDR216W	ADR1	protein_coding	IV	Carbon source-responsive zinc-finger transcription factor; required for transcription of the glucose-repressed gene ADH2, of peroxisomal protein genes, and of genes required for ethanol, glycerol, and fatty acid utilization	1566.94	2.6859	0	1
YPR030W	CSR2	protein_coding	XVI	Nuclear ubiquitin protein ligase binding protein; may regulate utilization of nonfermentable carbon sources and endocytosis of plasma membrane proteins; overproduction suppresses chs5 spa2 lethality at high temp; ubiquitinated by Rsp5p, deubiquitinated by Ubp2p; CSR2 has a paralog, ECM21, that arose from the whole genome duplication	297.574	2.67664	5.4357e-95	1
YIL113W	SDP1	protein_coding	IX	Stress-inducible dual-specificity MAP kinase phosphatase; negatively regulates Slt2p MAP kinase by direct dephosphorylation, diffuse localization under normal conditions shifts to punctate localization after heat shock; SDP1 has a paralog, MSG5, that arose from the whole genome duplication	67.4292	2.65377	3.05222e-33	1
YNR066C		protein_coding	XIV	Putative membrane-localized protein of unknown function	956.784	2.6029	1.61817e-222	5
YJL026W	RNR2	protein_coding	X	Ribonucleotide-diphosphate reductase (RNR), small subunit; the RNR complex catalyzes the rate-limiting step in dNTP synthesis and is regulated by DNA replication and DNA damage checkpoint pathways via localization of the small subunits; RNR2 has a paralog, RNR4, that arose from the whole genome duplication	12689.3	2.59425	5.34696e-264	1
YMR196W		protein_coding	XIII	Putative protein of unknown function; green fluorescent protein (GFP)-fusion protein localizes to the cytoplasm; YMR196W is not an essential gene	973.186	2.58997	4.75917e-220	1
YNL160W	YGP1	protein_coding	XIV	Cell wall-related secretory glycoprotein; induced by nutrient deprivation-associated growth arrest and upon entry into stationary phase; may be involved in adaptation prior to stationary phase entry; YGP1 has a paralog, SPS100, that arose from the whole genome duplication	899.737	2.58473	1.7743e-83	1
YDL048C	STP4	protein_coding	IV	Protein containing a Kruppel-type zinc-finger domain; similar to Stp1p, Stp2p; predicted transcription factor; relative distribution to the nucleus increases upon DNA replication stress; STP4 has a paralog, STP3, that arose from the whole genome duplication	353.784	2.58284	4.42173e-80	1
YNL274C	GOR1	protein_coding	XIV	Glyoxylate reductase; null mutation results in increased biomass after diauxic shift; the authentic, non-tagged protein is detected in highly purified mitochondria in high-throughput studies; protein abundance increases in response to DNA replication stress	286.496	2.56654	8.59616e-97	1
YGL053W	PRM8	protein_coding	VII	Pheromone-regulated protein; contains with 2 predicted transmembrane segments and an FF sequence, a motif involved in COPII binding; forms a complex with Prp9p in the ER; member of DUP240 gene family; PRM8 has a paralog, PRM9, that arose from a segmental duplication	138.778	2.56366	1.10655e-64	5
YNR065C	YNR065C	protein_coding	XIV	Protein of unknown function; protein-protein interactions suggest a possible role in actin patch formation; YNR065C is not an essential gene	2052.15	2.55452	4.14891e-247	5
YDR043C	NRG1	protein_coding	IV	Transcriptional repressor; recruits the Cyc8p-Tup1p complex to promoters; mediates glucose repression and negatively regulates a variety of processes including filamentous growth and alkaline pH response; activated in stochastic pulses of nuclear localization in response to low glucose	306.46	2.54381	2.42315e-69	1
YEL039C	CYC7	protein_coding	V	Cytochrome c isoform 2, expressed under hypoxic conditions; also known as iso-2-cytochrome c; electron carrier of the mitochondrial intermembrane space that transfers electrons from ubiquinone-cytochrome c oxidoreductase to cytochrome c oxidase during cellular respiration; protein abundance increases in response to DNA replication stress; CYC7 has a paralog, CYC1, that arose from the whole genome…	139.566	2.52511	1.69854e-30	1
YDR018C		protein_coding	IV	Probable membrane protein with three predicted transmembrane domains; similar to C. elegans F55A11.5 and maize 1-acyl-glycerol-3-phosphate acyltransferase; YDR018C has a paralog, CST26, that arose from the whole genome duplication	61.1029	2.5222	4.60524e-24	6
YBR294W	SUL1	protein_coding	II	High affinity sulfate permease of the SulP anion transporter family; sulfate uptake is mediated by specific sulfate transporters Sul1p and Sul2p, which control the concentration of endogenous activated sulfate intermediates	52.6034	2.52041	4.15056e-22	5
YNL208W		protein_coding	XIV	Protein of unknown function; may interact with ribosomes, based on co-purification experiments; authentic, non-tagged protein is detected in purified mitochondria in high-throughput studies; potential orthologs found in other fungi	2005.11	2.5161	7.84804e-271	1
YGL156W	AMS1	protein_coding	VII	Vacuolar alpha mannosidase; involved in free oligosaccharide (fOS) degradation; delivered to the vacuole in a novel pathway separate from the secretory pathway	560.372	2.50767	4.73022e-144	1
YPR002W	PDH1	protein_coding	XVI	Putative 2-methylcitrate dehydratase; mitochondrial protein that participates in respiration; induced by diauxic shift; homologous to E. coli PrpD, may take part in the conversion of 2-methylcitrate to 2-methylisocitrate	176.573	2.5061	1.10154e-53	6
YNL195C		protein_coding	XIV	Protein of unknown function; shares a promoter with YNL194C; the authentic, non-tagged protein is detected in highly purified mitochondria in high-throughput studies; YNL195C has a paralog, HBT1, that arose from the whole genome duplication	89.4468	2.48887	6.19892e-33	1
YIR028W	DAL4	protein_coding	IX	Allantoin permease; expression sensitive to nitrogen catabolite repression and induced by allophanate, an intermediate in allantoin degradation	145.952	2.46805	1.31132e-46	5
YCL055W	KAR4	protein_coding	III	Transcription factor required for response to pheromones; also required during meiosis; exists in two forms, a slower-migrating form more abundant during vegetative growth and a faster-migrating form induced by pheromone	152.145	2.46668	1.29655e-52	5
YBR296C	PHO89	protein_coding	II	Plasma membrane Na+/Pi cotransporter; active in early growth phase; similar to phosphate transporters of Neurospora crassa; transcription regulated by inorganic phosphate concentrations and Pho4p; mutations in related human transporter genes hPit1 and hPit2 are associated with hyperphosphatemia-induced calcification of vascular tissue and familial idiopathic basal ganglia calcification	1232.81	2.45089	8.96078e-90	1
YDL039C	PRM7	protein_coding	IV	Pheromone-regulated protein; predicted to have one transmembrane segment; promoter contains Gcn4p binding elements; in W303 strain one continuous open reading frame comprising of YDL037C, the intergenic region and YDL039C encodes the IMI1	464.422	2.43395	2.48153e-30	1
YOL058W	ARG1	protein_coding	XV	Arginosuccinate synthetase; catalyzes the formation of L-argininosuccinate from citrulline and L-aspartate in the arginine biosynthesis pathway; potential Cdc28p substrate	513.444	2.43387	1.03721e-92	5
YJL153C	INO1	protein_coding	X	Inositol-3-phosphate synthase; involved in synthesis of inositol phosphates and inositol-containing phospholipids; transcription is coregulated with other phospholipid biosynthetic genes by Ino2p and Ino4p, which bind the UASINO DNA element	455.528	2.42954	1.3091e-48	5
YIR038C	GTT1	protein_coding	IX	ER associated glutathione S-transferase; capable of homodimerization; glutathione transferase for Yvc1p vacuolar cation channel; expression induced during the diauxic shift and throughout stationary phase; functional overlap with Gtt2p, Grx1p, and Grx2p	672.798	2.42506	1.99467e-139	1
YJL217W	REE1	protein_coding	X	Cytoplasmic protein involved in the regulation of enolase (ENO1); mRNA expression is induced by calcium shortage, copper deficiency (via Mac1p) and the presence of galactose (via Gal4p); mRNA expression is also regulated by the cell cycle	1017.04	2.41772	7.49737e-195	1
YJL105W	SET4	protein_coding	X	Protein of unknown function, contains a SET domain; SET4 has a paralog, SET3, that arose from the whole genome duplication	62.864	2.40201	1.49371e-23	6
YBR033W	EDS1	protein_coding	II	Putative zinc cluster protein, predicted to be a transcription factor; not an essential gene; EDS1 has a paralog, RGT1, that arose from the whole genome duplication	70.9514	2.40086	6.76906e-29	6
YPL017C	IRC15	protein_coding	XVI	Microtubule associated protein; regulates microtubule dynamics; required for accurate meiotic chromosome segregation; null mutant displays large budded cells due to delayed mitotic progression, increased levels of spontaneous Rad52 foci; IRC15 has a paralog, LPD1, that arose from the whole genome duplication	74.6919	2.39956	1.69562e-34	6
YNL042W	BOP3	protein_coding	XIV	Protein of unknown function; potential Cdc28p substrate; overproduction confers resistance to methylmercury	205.925	2.38947	3.84068e-45	5
YNR002C	ATO2	protein_coding	XIV	Putative transmembrane protein involved in export of ammonia; ammonia is a starvation signal that promotes cell death in aging colonies; phosphorylated in mitochondria; member of the TC 9.B.33 YaaH family; homolog of Y. lipolytica Gpr1p; ATO2 has a paralog, ADY2, that arose from the whole genome duplication	69.6697	2.38461	3.30233e-11	1
YML054C	CYB2	protein_coding	XIII	Cytochrome b2 (L-lactate cytochrome-c oxidoreductase); component of the mitochondrial intermembrane space, required for lactate utilization; expression is repressed by glucose and anaerobic conditions	205.536	2.38085	3.78723e-51	1
YPR184W	GDB1	protein_coding	XVI	Glycogen debranching enzyme; contains glucanotranferase and alpha-1,6-amyloglucosidase activities; required for glycogen degradation; phosphorylated in mitochondria; activity is inhibited by Igd1p; protein abundance increases in response to DNA replication stress	2049.75	2.37601	6.34822e-99	1
YLR149C		protein_coding	XII	Protein of unknown function; overexpression causes a cell cycle delay or arrest; null mutation results in a decrease in plasma membrane electron transport; YLR149C is not an essential gene; protein abundance increases in response to DNA replication stress	305.521	2.37286	1.52176e-60	1
YOR348C	PUT4	protein_coding	XV	Proline permease; required for high-affinity transport of proline; also transports the toxic proline analog azetidine-2-carboxylate (AzC); PUT4 transcription is repressed in ammonia-grown cells	984.879	2.37065	5.81877e-68	1
YEL060C	PRB1	protein_coding	V	Vacuolar proteinase B (yscB) with H3 N-terminal endopeptidase activity; serine protease of the subtilisin family; involved in protein degradation in the vacuole and required for full protein degradation during sporulation; activity inhibited by Pbi2p; protein abundance increases in response to DNA replication stress; PRB1 has a paralog, YSP3, that arose from the whole genome duplication	3983.04	2.36895	0	1
YHR092C	HXT4	protein_coding	VIII	High-affinity glucose transporter; member of the major facilitator superfamily, expression is induced by low levels of glucose and repressed by high levels of glucose; HXT4 has a paralog, HXT7, that arose from the whole genome duplication	3444.62	2.35784	2.95186e-118	1
YHR071W	PCL5	protein_coding	VIII	Cyclin; interacts with and phosphorylated by Pho85p cyclin-dependent kinase (Cdk), induced by Gcn4p at level of transcription, specifically required for Gcn4p degradation, may be sensor of cellular protein biosynthetic capacity	985.192	2.34129	1.69392e-196	5
YKR053C	YSR3	protein_coding	XI	Dihydrosphingosine 1-phosphate phosphatase; membrane protein involved in sphingolipid metabolism; YSR3 has a paralog, LCB3, that arose from the whole genome duplication	233.829	2.31139	9.69835e-98	1
YER158C		protein_coding	V	Protein of unknown function; potentially phosphorylated by Cdc28p; YER158C has a paralog, AFR1, that arose from the whole genome duplication	303.694	2.30817	3.89039e-108	1
YJL079C	PRY1	protein_coding	X	Sterol binding protein involved in the export of acetylated sterols; secreted glycoprotein and member of the CAP protein superfamily (cysteine-rich secretory proteins (CRISP), antigen 5, and pathogenesis related 1 proteins); sterol export function is redundant with that of PRY2; may be involved in detoxification of hydrophobic compounds; PRY1 has a paralog, PRY2, that arose from the whole genome …	836.986	2.30444	3.05809e-156	1
YIL162W	SUC2	protein_coding	IX	Invertase; sucrose hydrolyzing enzyme; a secreted, glycosylated form is regulated by glucose repression, and an intracellular, nonglycosylated enzyme is produced constitutively	1941.59	2.29749	8.2848e-176	1
YOR374W	ALD4	protein_coding	XV	Mitochondrial aldehyde dehydrogenase; required for growth on ethanol and conversion of acetaldehyde to acetate; phosphorylated; activity is K+ dependent; utilizes NADP+ or NAD+ equally as coenzymes; expression is glucose repressed; can substitute for cytosolic NADP-dependent aldehyde dehydrogenase when directed to the cytosol; human homolog ALDH2 can complement yeast ald4 mutant	2996.17	2.29383	9.74464e-132	1
YDR343C	HXT6	protein_coding	IV	High-affinity glucose transporter; member of the major facilitator superfamily, nearly identical to Hxt7p, expressed at high basal levels relative to other HXTs, repression of expression by high glucose requires SNF3; HXT6 has a paralog, HXT1, that arose from the whole genome duplication	134.993	2.28732	1.72776e-09	1
YMR181C		protein_coding	XIII	Protein of unknown function; mRNA transcribed as part of a bicistronic transcript with a predicted transcriptional repressor RGM1/YMR182C; mRNA is destroyed by nonsense-mediated decay (NMD); not an essential gene; YMR181C has a paralog, YPL229W, that arose from the whole genome duplication	381.363	2.28148	1.03088e-78	1
YIL155C	GUT2	protein_coding	IX	Mitochondrial glycerol-3-phosphate dehydrogenase; expression is repressed by both glucose and cAMP and derepressed by non-fermentable carbon sources in a Snf1p, Rsf1p, Hap2/3/4/5 complex dependent manner	900.332	2.27312	9.13424e-218	1
YML042W	CAT2	protein_coding	XIII	Carnitine acetyl-CoA transferase; present in both mitochondria and peroxisomes; transfers activated acetyl groups to carnitine to form acetylcarnitine which can be shuttled across membranes	144.326	2.27027	5.48801e-37	6
YGL146C	RRT6	protein_coding	VII	Putative protein of unknown function; non-essential gene identified in a screen for mutants with increased levels of rDNA transcription; contains two putative transmembrane spans, but no significant homology to other known proteins	67.2948	2.26379	1.2849e-26	6
YMR250W	GAD1	protein_coding	XIII	Glutamate decarboxylase; converts glutamate into gamma-aminobutyric acid (GABA) during glutamate catabolism; involved in response to oxidative stress	459.812	2.24436	2.19475e-76	1
YHL044W		protein_coding	VIII	Putative integral membrane protein; member of DUP240 gene family; green fluorescent protein (GFP)-fusion protein localizes to the plasma membrane in a punctate pattern	111.671	2.24194	1.69805e-39	1
YNL036W	NCE103	protein_coding	XIV	Carbonic anhydrase; metalloenzyme that catalyzes CO2 hydration to bicarbonate, which is an important metabolic substrate, and protons; not expressed under conditions of high CO2, such as inside a growing colony, but transcription is induced in response to low CO2 levels, such as on the colony surface in ambient air; poorly transcribed under aerobic conditions and at an undetectable level under an…	775.645	2.23369	1.80265e-13	5
YDL024C	DIA3	protein_coding	IV	Protein of unknown function; involved in invasive and pseudohyphal growth	69.4792	2.23283	1.67384e-24	6
YHR022C		protein_coding	VIII	Putative protein of unknown function; YHR022C is not an essential gene	154.424	2.22044	5.1668e-50	1
YBL064C	PRX1	protein_coding	II	Mitochondrial peroxiredoxin with thioredoxin peroxidase activity; has a role in reduction of hydroperoxides; reactivation requires Trr2p and glutathione; induced during respiratory growth and oxidative stress; phosphorylated; protein abundance increases in response to DNA replication stress	243.198	2.21783	4.81279e-79	1
YNR034W-A	EGO4	protein_coding	XIV	Protein of unknown function; expression is regulated by Msn2p/Msn4p; YNR034W-A has a paralog, YCR075W-A, that arose from the whole genome duplication	70.6093	2.21122	4.67574e-09	1
YGR256W	GND2	protein_coding	VII	6-phosphogluconate dehydrogenase (decarboxylating); catalyzes an NADPH regenerating reaction in the pentose phosphate pathway; required for growth on D-glucono-delta-lactone; GND2 has a paralog, GND1, that arose from the whole genome duplication	125.299	2.20631	1.13501e-29	6
YDL204W	RTN2	protein_coding	IV	Reticulon protein; involved in nuclear pore assembly and maintenance of tubular ER morphology; promotes membrane curvature; regulates the ER asymmetry-induced inheritance block during ER stress; role in ER-derived peroxisomal biogenesis; interacts with Sec6p, Yip3p, and Sbh1p; less abundant than RTN1; member of RTNLA (reticulon-like A) subfamily; protein increases in abundance and relocalizes to …	432.826	2.19825	5.75501e-13	1
YFR015C	GSY1	protein_coding	VI	Glycogen synthase; expression induced by glucose limitation, nitrogen starvation, environmental stress, and entry into stationary phase; GSY1 has a paralog, GSY2, that arose from the whole genome duplication; relocalizes from nucleus to cytoplasmic foci upon DNA replication stress	806.63	2.19692	2.70803e-144	1
YHR087W	RTC3	protein_coding	VIII	Protein of unknown function involved in RNA metabolism; has structural similarity to SBDS, the human protein mutated in Shwachman-Diamond Syndrome (the yeast SBDS ortholog = SDO1); null mutation suppresses cdc13-1 temperature sensitivity; protein abundance increases in response to DNA replication stress	106.385	2.18266	1.94885e-26	1
YDR077W	SED1	protein_coding	IV	Major stress-induced structural GPI-cell wall glycoprotein; associates with translating ribosomes, possible role in mitochondrial genome maintenance; ORF contains two distinct variable minisatellites; SED1 has a paralog, SPI1, that arose from the whole genome duplication	40786.6	2.17606	2.36262e-132	1
YDL037C	BSC1	protein_coding	IV	Protein of unconfirmed function; similar to cell surface flocculin Flo11p; ORF exhibits genomic organization compatible with a translational readthrough-dependent mode of expression; in W303 strain one continuous open reading frame comprising of YDL037C, the intergenic region and YDL039C encodes the gene IMI1	323.285	2.16494	5.46472e-31	1
YLR312C		protein_coding	XII	Autophagy receptor with a role in degradation of the ER and nucleus; involved specifically in autophagy of perinuclear endoplasmic reticulum in response to nitrogen starvation or rapamycin treatment; localizes to the perinuclear ER	51.9164	2.15805	2.31658e-19	6
YDR085C	AFR1	protein_coding	IV	Protein required for pheromone-induced projection (shmoo) formation; regulates septin architecture during mating; has an RVXF motif that mediates targeting of Glc7p to mating projections; interacts with Cdc12p; AFR1 has a paralog, YER158C, that arose from the whole genome duplication	488.54	2.14786	5.14686e-106	6
YML128C	MSC1	protein_coding	XIII	Protein of unknown function; mutant is defective in directing meiotic recombination events to homologous chromatids; the authentic, non-tagged protein is detected in highly purified mitochondria and is phosphorylated	430.188	2.14083	5.44464e-28	1
YER062C		protein_coding	V	DL-glycerol-3-phosphate phosphatase involved in glycerol biosynthesis; also known as glycerol-1-phosphatase; induced in response to hyperosmotic or oxidative stress, and during diauxic shift; GPP2 has a paralog, GPP1, that arose from the whole genome duplication	663.446	2.14036	1.21785e-149	1
YOL083W	ATG34	protein_coding	XV	Receptor protein involved in selective autophagy during starvation; specifically involved in the transport of cargo protein alpha-mannosidase (Ams1p); Atg19p paralog	71.2416	2.12984	4.78448e-25	6
YGL117W		protein_coding	VII	Putative protein of unknown function	146.226	2.12813	6.35503e-55	5
YGR249W	MGA1	protein_coding	VII	Protein similar to heat shock transcription factor; multicopy suppressor of pseudohyphal growth defects of ammonium permease mutants	97.141	2.11645	1.82256e-31	1
YGR254W	ENO1	protein_coding	VII	Enolase I, a phosphopyruvate hydratase; catalyzes conversion of 2-phosphoglycerate to phosphoenolpyruvate during glycolysis and the reverse reaction during gluconeogenesis; expression repressed in response to glucose; protein abundance increases in response to DNA replication stress; N-terminally propionylated in vivo; ENO1 has a paralog, ENO2, that arose from the whole genome duplication	11495.8	2.11522	5.22915e-97	6
YGR067C		protein_coding	VII	Putative protein of unknown function; contains a zinc finger motif similar to that of Adr1p	101.453	2.10038	3.32184e-33	6
YKL187C	FAT3	protein_coding	XI	Protein required for fatty acid uptake; protein abundance increases in cortical patches in response to oleate exposure; the authentic, non-tagged protein is detected in a phosphorylated state in highly purified mitochondria in high-throughput studies; FAT3 has a paralog, YLR413W, that arose from the whole genome duplication	476.653	2.09238	8.63216e-60	1
YLR178C	TFS1	protein_coding	XII	Inhibitor of carboxypeptidase Y (Prc1p), and Ras GAP (Ira2p); phosphatidylethanolamine-binding protein (PEBP) family member and ortholog of hPEBP1/RKIP, a natural metastasis suppressor; targets to vacuolar membranes during stationary phase; acetylated by NatB N-terminal acetyltransferase; protein abundance increases in response to DNA replication stress	262.232	2.08449	3.0406e-44	1
YCL038C	ATG22	protein_coding	III	Vacuolar integral membrane protein required for efflux of amino acids; required for efflux of amino acids during autophagic body breakdown in the vacuole; null mutation causes a gradual loss of viability during starvation	495.115	2.08411	4.43131e-80	6
YGR161C	RTS3	protein_coding	VII	Putative component of the protein phosphatase type 2A complex	745.918	2.08272	8.59188e-120	6
YPL248C	GAL4	protein_coding	XVI	DNA-binding transcription factor required for activating GAL genes; responds to galactose; repressed by Gal80p and activated by Gal3p	166.018	2.07935	4.35025e-52	6
YMR305C	SCW10	protein_coding	XIII	Cell wall protein with similarity to glucanases; may play a role in conjugation during mating based on mutant phenotype and its regulation by Ste12p; SWC10 has a paralog, SCW4, that arose from the whole genome duplication	8048.53	2.07866	5.36859e-239	1
YBR085C-A		protein_coding	II	Protein of unknown function; green fluorescent protein (GFP)-fusion protein localizes to the cytoplasm and to the nucleus; protein abundance increases in response to DNA replication stress	936.837	2.07289	2.81842e-188	1
YOR347C	PYK2	protein_coding	XV	Pyruvate kinase; appears to be modulated by phosphorylation; transcription repressed by glucose, and Pyk2p may be active under low glycolytic flux; PYK2 has a paralog, CDC19, that arose from the whole genome duplication	447.42	2.07057	3.35537e-131	6
YIL116W	HIS5	protein_coding	IX	Histidinol-phosphate aminotransferase; catalyzes the seventh step in histidine biosynthesis; responsive to general control of amino acid biosynthesis; mutations cause histidine auxotrophy and sensitivity to Cu, Co, and Ni salts	681.359	2.06937	2.50907e-157	5
YHR138C		protein_coding	VIII	Protein of unknown function; similar to Pbi2p; double null mutant lacking Pbi2p and Yhr138cp exhibits highly fragmented vacuoles; protein abundance increases in response to DNA replication stress	181.279	2.06501	1.54655e-51	6
YOR032C	HMS1	protein_coding	XV	bHLH protein with similarity to myc-family transcription factors; overexpression confers hyperfilamentous growth and suppresses the pseudohyphal filamentation defect of a diploid mep1 mep2 homozygous null mutant	153.249	2.06039	2.42107e-45	1
YKR058W	GLG1	protein_coding	XI	Glycogenin glucosyltransferase; self-glucosylating initiator of glycogen synthesis, also glucosylates n-dodecyl-beta-D-maltoside; SWAT-GFP and mCherry fusion proteins localize to the cell periphery and vacuole respectively; similar to mammalian glycogenin; GLG1 has a paralog, GLG2, that arose from the whole genome duplication	181.288	2.05826	3.26369e-63	6
YDR259C	YAP6	protein_coding	IV	Basic leucine zipper (bZIP) transcription factor; physically interacts with the Tup1-Cyc8 complex and recruits Tup1p to its targets; overexpression increases sodium and lithium tolerance; computational analysis suggests a role in regulation of expression of genes involved in carbohydrate metabolism; YAP6 has a paralog, CIN5, that arose from the whole genome duplication	211.98	2.05509	2.36521e-46	1
YJR061W		protein_coding	X	Putative protein of unknown function; non-essential gene; transcription repressed by Rm101p; YJR061W has a paralog, MNN4, that arose from the whole genome duplication	380.472	2.04963	1.37326e-93	1
YDR277C	MTH1	protein_coding	IV	Negative regulator of the glucose-sensing signal transduction pathway; required for repression of transcription by Rgt1p; interacts with Rgt1p and the Snf3p and Rgt2p glucose sensors; phosphorylated by Yck1p, triggering Mth1p degradation; MTH1 has a paralog, STD1, that arose from the whole genome duplication	347.203	2.04604	3.32197e-65	1
YCL040W	GLK1	protein_coding	III	Glucokinase; catalyzes the phosphorylation of glucose at C6 in the first irreversible step of glucose metabolism; one of three glucose phosphorylating enzymes; expression regulated by non-fermentable carbon sources; GLK1 has a paralog, EMI2, that arose from the whole genome duplication	3200.19	2.0347	1.3666e-117	1
YEL067C		protein_coding	V	Putative protein of unknown function; the authentic, non-tagged protein is detected in highly purified mitochondria in high-throughput studies	97.1833	2.02749	5.97299e-27	1
YJL171C	TOH1	protein_coding	X	GPI-anchored cell wall protein of unknown function; induced in response to cell wall damaging agents and by mutations in genes involved in cell wall biogenesis; sequence similarity to YBR162C/TOS1, a covalently bound cell wall protein; protein abundance increases in response to DNA replication stress	3060.88	2.02713	2.11396e-115	6
YOL154W	ZPS1	protein_coding	XV	Putative GPI-anchored protein; transcription is induced under low-zinc conditions, as mediated by the Zap1p transcription factor, and at alkaline pH	109.341	2.02627	1.06572e-45	6
YMR081C	ISF1	protein_coding	XIII	Serine-rich, hydrophilic protein; overexpression suppresses growth defects of hap2, hap3, and hap4 mutants; expression is under glucose control; cotranscribed with NAM7 in a cyp1 mutant; ISF1 has a paralog, MBR1, that arose from the whole genome duplication	71.5091	2.02083	5.82526e-18	1
YMR169C	ALD3	protein_coding	XIII	Cytoplasmic aldehyde dehydrogenase; involved in beta-alanine synthesis; uses NAD+ as the preferred coenzyme; very similar to Ald2p; expression is induced by stress and repressed by glucose	137.845	2.01626	1.29428e-08	1
YMR065W	KAR5	protein_coding	XIII	Protein required for nuclear membrane fusion during karyogamy; localizes to the membrane with a soluble portion in the endoplasmic reticulum lumen, may form a complex with Jem1p and Kar2p; similar to zebrafish Brambleberry protein; expression of the gene is regulated by pheromone	70.2151	2.00264	4.35332e-24	5
YHR211W	FLO5	protein_coding	VIII	Lectin-like cell wall protein (flocculin) involved in flocculation; binds mannose chains on the surface of other cells, confers floc-forming ability that is chymotrypsin resistant but heat labile; important for co-flocculation with other yeasts, mediating interaction with specific species; FLO5 has a paralog, FLO1, that arose from a segmental duplication	827.97	2.00066	8.94594e-77	1
YGR286C	BIO2	protein_coding	VII	Biotin synthase; catalyzes the conversion of dethiobiotin to biotin, which is the last step of the biotin biosynthesis pathway; complements E. coli bioB mutant	551.378	1.99345	1.18607e-98	1
YLR134W	PDC5	protein_coding	XII	Minor isoform of pyruvate decarboxylase; key enzyme in alcoholic fermentation, decarboxylates pyruvate to acetaldehyde, regulation is glucose- and ethanol-dependent, repressed by thiamine, involved in amino acid catabolism	419.417	1.99094	3.88721e-70	6
YDL130W-A	STF1	protein_coding	IV	Protein involved in regulation of the mitochondrial F1F0-ATP synthase; Stf1p and Stf2p act as stabilizing factors that enhance inhibitory action of the Inh1p protein; protein abundance increases in response to DNA replication stress; STF1 has a paralog, INH1, that arose from the whole genome duplication	229.411	1.98822	1.78667e-38	6
YER067W	RGI1	protein_coding	V	Protein of unknown function; involved in energy metabolism under respiratory conditions; protein abundance is increased upon intracellular iron depletion or in response to DNA replication stress; RGI1 has a paralog, RGI2, that arose from the whole genome duplication	221.236	1.98537	2.88683e-12	1
YHR209W	CRG1	protein_coding	VIII	S-AdoMet-dependent methyltransferase involved in lipid homeostasis; mediates resistance to a drug cantharidin	436.198	1.98174	2.40103e-60	5
YHR210C		protein_coding	VIII	Putative aldose 1-epimerase superfamily protein; non-essential gene; highly expressed under anaeorbic conditions	66.9237	1.98015	2.16918e-23	6
YOR185C	GSP2	protein_coding	XV	GTP binding protein (mammalian Ranp homolog); involved in the maintenance of nuclear organization, RNA processing and transport; interacts with Kap121p, Kap123p and Pdr6p (karyophilin betas); not required for viability; protein abundance increases in response to DNA replication stress; GSP2 has a paralog, GSP1, that arose from the whole genome duplication	204.108	1.97535	3.56368e-58	6
YGR180C	RNR4	protein_coding	VII	Ribonucleotide-diphosphate reductase (RNR) small subunit; the RNR complex catalyzes the rate-limiting step in dNTP synthesis and is regulated by DNA replication and DNA damage checkpoint pathways via localization of the small subunits; relocalizes from nucleus to cytoplasm upon DNA replication stress; RNR4 has a paralog, RNR2, that arose from the whole genome duplication	7531.23	1.97487	5.49685e-244	1
YOR049C	RSB1	protein_coding	XV	Putative sphingoid long-chain base (LCB) efflux transporter; integral membrane transporter that localizes to the plasma membrane and may transport long chain bases (LCBs) from the cytoplasmic side toward the extracytoplasmic side of the membrane; role in glycerophospholipid translocation; suppressor of the sphingoid LCB sensitivity of an LCB-lyase mutation	254.355	1.95539	3.01372e-29	1
YOL126C	MDH2	protein_coding	XV	Cytoplasmic malate dehydrogenase; one of three isozymes that catalyze interconversion of malate and oxaloacetate; involved in the glyoxylate cycle and gluconeogenesis during growth on two-carbon compounds; interacts with Pck1p and Fbp1	595.096	1.95267	2.71121e-102	6
YMR008C	PLB1	protein_coding	XIII	Phospholipase B (lysophospholipase) involved in lipid metabolism; required for efficient acyl chain remodeling of newly synthesized phosphatidylethanolamine-derived phosphatidylcholine; required for deacylation of phosphatidylcholine and phosphatidylethanolamine but not phosphatidylinositol; PLB1 has a paralog, PLB3, that arose from the whole genome duplication	3602.18	1.94668	9.09048e-259	1
YDL022W	GPD1	protein_coding	IV	NAD-dependent glycerol-3-phosphate dehydrogenase; key enzyme of glycerol synthesis, essential for growth under osmotic stress; expression regulated by high-osmolarity glycerol response pathway; protein abundance increases in response to DNA replication stress; constitutively inactivated via phosphorylation by the protein kinases Ypk1p and Ypk2p, dephosphorylation increases catalytic activity; for…	1615.2	1.93456	4.7951e-219	1
YBR132C	AGP2	protein_coding	II	Plasma membrane regulator of polyamine and carnitine transport; has similarity to transporters but lacks transport activity; may act as a sensor that transduces environmental signals; has a positive or negative regulatory effect on transcription of many transporter genes	703.723	1.92857	6.97156e-98	6
YDR453C	TSA2	protein_coding	IV	Stress inducible cytoplasmic thioredoxin peroxidase; cooperates with Tsa1p in the removal of reactive oxygen, nitrogen and sulfur species using thioredoxin as hydrogen donor; deletion enhances the mutator phenotype of tsa1 mutants; protein abundance increases in response to DNA replication stress; TSA2 has a paralog, TSA1, that arose from the whole genome duplication	94.3076	1.92347	2.93102e-22	6
YNL237W	YTP1	protein_coding	XIV	Probable type-III integral membrane protein of unknown function; has regions of similarity to mitochondrial electron transport proteins	173.55	1.92303	2.53359e-20	1
YMR191W	SPG5	protein_coding	XIII	Protein required for proteasome assembly during quiescence; binds to base of the proteasome regulartory particle; required for survival at high temperature during stationary phase; not required for growth on nonfermentable carbon sources	1174.31	1.91687	6.87494e-117	6
YGR023W	MTL1	protein_coding	VII	Putative plasma membrane sensor; involved in cell integrity signaling and stress response during glucose starvation and oxidative stress; has structural and functional similarity to Mid2p; MTL1 has a paralog, MID2, that arose from the whole genome duplication	71.7336	1.90777	1.44351e-17	6
YNL200C	NNR1	protein_coding	XIV	NADHX epimerase; catalyzes isomerization of (R)- and (S)-NADHX; homologous to AIBP in mammals and the N- terminal domain of YjeF in E.coli; enzyme is widespread in eukaryotes, prokaryotes and archaea; the authentic, non-tagged protein is detected in highly purified mitochondria in high-throughput studies	356.533	1.90529	2.78514e-60	6
YBR169C	SSE2	protein_coding	II	Member of Hsp110 subclass of the heat shock protein 70 (HSP70) family; serves as nucleotide exchange factor to load ATP onto the SSA class of cytosolic Hsp70s; may be involved in protein folding; localized to the cytoplasm; SSE2 has a paralog, SSE1, that arose from the whole genome duplication	494.857	1.90006	7.71659e-89	6
YJL161W	FMP33	protein_coding	X	Putative protein of unknown function; the authentic, non-tagged protein is detected in highly purified mitochondria in high-throughput studies	63.9514	1.89503	1.17793e-16	6
YER081W	SER3	protein_coding	V	3-phosphoglycerate dehydrogenase and alpha-ketoglutarate reductase; 3PG dehydrogenase that catalyzes the first step in serine and glycine biosynthesis; also functions as an alpha-ketoglutarate reductase, converting alpha-ketoglutarate to D-2-hydroxyglutarate (D-2HG); localizes to the cytoplasm; SER3 has a paralog, SER33, that arose from the whole genome duplication	438.877	1.89456	6.55559e-107	5
YNR058W	BIO3	protein_coding	XIV	7,8-diamino-pelargonic acid aminotransferase (DAPA); catalyzes the second step in the biotin biosynthesis pathway; BIO3 is in a cluster of 3 genes (BIO3, BIO4, and BIO5) that mediate biotin synthesis; BIO3 and BIO4 were acquired by horizontal gene transfer (HGT) from bacteria	156.035	1.89229	1.32147e-40	6
YDR055W	PST1	protein_coding	IV	Cell wall protein that contains a putative GPI-attachment site; secreted by regenerating protoplasts; up-regulated by activation of the cell integrity pathway, as mediated by Rlm1p; upregulated by cell wall damage via disruption of FKS1; PST1 has a paralog, ECM33, that arose from the whole genome duplication	3735.2	1.89037	2.49219e-269	6
YDL234C	GYP7	protein_coding	IV	GTPase-activating protein for yeast Rab family members; members include Ypt7p (most effective), Ypt1p, Ypt31p, and Ypt32p (in vitro); involved in vesicle mediated protein trafficking; contains a PH-like domain	552.316	1.88661	3.17977e-93	5
YIR039C	YPS6	protein_coding	IX	Putative GPI-anchored aspartic protease; member of the yapsin family of proteases involved in cell wall growth and maintenance	381.296	1.88318	4.2918e-76	6
YAL062W	GDH3	protein_coding	I	NADP(+)-dependent glutamate dehydrogenase; synthesizes glutamate from ammonia and alpha-ketoglutarate; rate of alpha-ketoglutarate utilization differs from Gdh1p; expression regulated by nitrogen and carbon sources; GDH3 has a paralog, GDH1, that arose from the whole genome duplication	104.645	1.88073	1.22954e-28	6
YDL079C	MRK1	protein_coding	IV	Glycogen synthase kinase 3 (GSK-3) homolog; one of four GSK-3 homologs in S. cerevisiae that function to activate Msn2p-dependent transcription of stress responsive genes and that function in protein degradation; MRK1 has a paralog, RIM11, that arose from the whole genome duplication	106.813	1.87539	2.54304e-28	6
YIL117C	PRM5	protein_coding	IX	Pheromone-regulated protein, predicted to have 1 transmembrane segment; induced during cell integrity signaling; PRM5 has a paralog, YNL058C, that arose from the whole genome duplication	682.21	1.87389	3.90709e-119	5
YOR383C	FIT3	protein_coding	XV	Mannoprotein that is incorporated into the cell wall; incorporated via a glycosylphosphatidylinositol (GPI) anchor; involved in the retention of siderophore-iron in the cell wall	1452.38	1.87267	7.10067e-18	1
YHR096C	HXT5	protein_coding	VIII	Hexose transporter with moderate affinity for glucose; induced in the presence of non-fermentable carbon sources, induced by a decrease in growth rate, contains an extended N-terminal domain relative to other HXTs; HXT5 has a paralog, HXT3, that arose from the whole genome duplication	82.7857	1.86334	2.11211e-07	1
YKL218C	SRY1	protein_coding	XI	3-hydroxyaspartate dehydratase; deaminates L-threo-3-hydroxyaspartate to form oxaloacetate and ammonia; required in the presence of hydroxyaspartate; highly similar to mouse serine racemase (Srr) but has no serine racemase activity	146.273	1.86194	4.13223e-46	5
YFR017C	IGD1	protein_coding	VI	Cytoplasmic protein that inhibits Gdb1p glycogen debranching activity; required for normal intracellular accumulation of glycogen; phosphorylated in vivo; expression increases during wine fermentation; protein abundance increases in response to DNA replication stress; IGD1 has a paralog, YOL024W, that arose from the whole genome duplication	80.4492	1.85581	1.46543e-17	6
YNL015W	PBI2	protein_coding	XIV	Cytosolic inhibitor of vacuolar proteinase B (PRB1); required for efficient vacuole inheritance; with thioredoxin forms protein complex LMA1, which assists in priming SNARE molecules and promotes vacuole fusion; protein abundance increases in response to DNA replication stress	387.531	1.83677	7.3463e-40	1
YKR013W	PRY2	protein_coding	XI	Sterol binding protein involved in the export of acetylated sterols; secreted glycoprotein and member of the CAP protein superfamily (cysteine-rich secretory proteins (CRISP), antigen 5, and pathogenesis related 1 proteins); sterol export function is redundant with that of PRY1; may be involved in detoxification of hydrophobic compounds; PRY2 has a paralog, PRY1, that arose from the whole genome …	4101.99	1.83394	8.66249e-115	5
YHL035C	VMR1	protein_coding	VIII	Vacuolar membrane protein; involved in multiple drug resistance and metal sensitivity; ATP-binding cassette (ABC) family member involved in drug transport; potential Cdc28p substrate; induced under respiratory conditions; VMR1 has a paralog, YBT1, that arose from the whole genome duplication	1531.78	1.82955	2.00004e-69	5
YPR157W	TDA6	protein_coding	XVI	Putative protein of unknown function; induced by treatment with 8-methoxypsoralen and UVA irradiation; null mutant is sensitive to expression of the top1-T722A allele; SWAT-GFP and mCherry fusion proteins localize to the cell periphery and vacuole; TDA6 has a paralog, VPS62, that arose from the whole genome duplication	88.3232	1.82953	2.00591e-26	6
YMR020W	FMS1	protein_coding	XIII	Polyamine oxidase; converts spermine to spermidine, which is required for the essential hypusination modification of translation factor eIF-5A; also involved in pantothenic acid biosynthesis	251.746	1.82728	3.32203e-72	6
YFL030W	AGX1	protein_coding	VI	Alanine:glyoxylate aminotransferase (AGT); catalyzes the synthesis of glycine from glyoxylate, which is one of three pathways for glycine biosynthesis in yeast; similar to mammalian and plant alanine:glyoxylate aminotransferases; human homolog AGXT complements yeast null mutant	126.115	1.82646	2.57661e-30	6
YKL096W	CWP1	protein_coding	XI	Cell wall mannoprotein that localizes to birth scars of daughter cells; linked to a beta-1,3- and beta-1,6-glucan heteropolymer through a phosphodiester bond; required for propionic acid resistance	5176.71	1.82439	1.88586e-112	1
YCR102C		protein_coding	III	Putative protein of unknown function; involved in copper metabolism; similar to C. carbonum toxD gene; member of the quinone oxidoreductase family	87.777	1.82434	1.97302e-20	6
YJL133C-A		protein_coding	X	Putative protein of unknown function; the authentic, non-tagged protein is detected in highly purified mitochondria in high-throughput studies	220.605	1.81795	2.47102e-32	6
YIL055C		protein_coding	IX	Putative protein of unknown function	249.926	1.8167	2.20334e-54	6
YDR406W	PDR15	protein_coding	IV	Plasma membrane ATP binding cassette (ABC) transporter; multidrug transporter and general stress response factor implicated in cellular detoxification; regulated by Pdr1p, Pdr3p and Pdr8p; promoter contains a PDR responsive element; PDR15 has a paralog, PDR5, that arose from the whole genome duplication	1246.6	1.81554	3.02846e-89	1
YDR171W	HSP42	protein_coding	IV	Small heat shock protein (sHSP) with chaperone activity; forms barrel-shaped oligomers that suppress unfolded protein aggregation; involved in cytoskeleton reorganization after heat shock; protein abundance increases and forms cytoplasmic foci in response to DNA replication stress	280.455	1.81226	1.68448e-40	6
YCR100C		protein_coding	III	Putative protein of unknown function	188.416	1.81162	3.60356e-43	5
YAL061W	BDH2	protein_coding	I	Putative medium-chain alcohol dehydrogenase with similarity to BDH1; transcription induced by constitutively active PDR1 and PDR3	183.763	1.80502	1.7352e-21	1
YIR035C		protein_coding	IX	Putative cytoplasmic short-chain dehydrogenase/reductase	597.586	1.79672	6.89129e-93	1
YGR289C	MAL11	protein_coding	VII	High-affinity maltose transporter (alpha-glucoside transporter); inducible; encoded in the MAL1 complex locus; broad substrate specificity that includes maltotriose; required for isomaltose utilization	179.123	1.78793	4.99919e-45	6
YMR105C	PGM2	protein_coding	XIII	Phosphoglucomutase; catalyzes the conversion from glucose-1-phosphate to glucose-6-phosphate, which is a key step in hexose metabolism; functions as the acceptor for a Glc-phosphotransferase; protein abundance increases in response to DNA replication stress; PGM2 has a paralog, PGM1, that arose from the whole genome duplication	622.829	1.78581	1.92829e-51	6
YPL134C	ODC1	protein_coding	XVI	Mitochondrial inner membrane transporter; 2-oxodicarboxylate transporter, exports 2-oxoadipate and 2-oxoglutarate from the mitochondrial matrix to the cytosol for lysine and glutamate biosynthesis and lysine catabolism; suppresses, in multicopy, an fmc1 null mutation; ODC1 has a paralog, ODC2, that arose from the whole genome duplication	216.116	1.78447	1.10447e-47	6
YDR032C	PST2	protein_coding	IV	Protein with similarity to a family of flavodoxin-like proteins; induced by oxidative stress in a Yap1p dependent manner; the authentic, non-tagged protein is detected in highly purified mitochondria in high-throughput studies; protein abundance increases in response to DNA replication stress; PST2 has a paralog, RFS1, that arose from the whole genome duplication	1750.78	1.77798	5.43581e-122	6
YLL028W	TPO1	protein_coding	XII	Polyamine transporter of the major facilitator superfamily; member of the 12-spanner drug:H(+) antiporter DHA1 family; recognizes spermine, putrescine, and spermidine; catalyzes uptake of polyamines at alkaline pH and excretion at acidic pH; during oxidative stress exports spermine, spermidine from the cell, which controls timing of expression of stress-responsive genes; phosphorylation enhances …	2750.81	1.77442	2.4076e-114	6
YIR034C	LYS1	protein_coding	IX	Saccharopine dehydrogenase (NAD+, L-lysine-forming); catalyzes the conversion of saccharopine to L-lysine, which is the final step in the lysine biosynthesis pathway; also has mRNA binding activity	570.533	1.7698	8.94086e-100	5
YOR011W	AUS1	protein_coding	XV	Plasma membrane sterol transporter of the ATP-binding cassette family; required, along with Pdr11p, for uptake of exogenous sterols and their incorporation into the plasma membrane; activity is stimulated by phosphatidylserine; sterol uptake is required for anaerobic growth because sterol biosynthesis requires oxygen; AUS1 has a paralog, PDR11, that arose from the whole genome duplication	839.852	1.76925	4.23831e-83	6
YDL241W		protein_coding	IV	Putative protein of unknown function; SWAT-GFP and mCherry fusion proteins localize to the endoplasmic reticulum; YDL241W is not an essential gene	218.083	1.76695	8.45352e-57	6
YJR078W	BNA2	protein_coding	X	Tryptophan 2,3-dioxygenase or indoleamine 2,3-dioxygenase; required for de novo biosynthesis of NAD from tryptophan via kynurenine; interacts genetically with telomere capping gene CDC13; regulated by Hst1p and Aftp	98.4958	1.76609	4.56648e-26	5
YIL136W	OM45	protein_coding	IX	Mitochondrial outer membrane protein of unknown function; major constituent of the outer membrane, extending into the intermembrane space; interacts with porin (Por1p) and with Om14p; imported via the presequence pathway involving the TOM and TIM23 complexes, then assembled in the outer membrane by Mim1p; protein abundance increases in response to DNA replication stress	330.637	1.76545	2.39755e-17	6
YAR035W	YAT1	protein_coding	I	Outer mitochondrial carnitine acetyltransferase; minor ethanol-inducible enzyme involved in transport of activated acyl groups from the cytoplasm into the mitochondrial matrix; phosphorylated	124.741	1.76242	1.01046e-27	6
YLR304C	ACO1	protein_coding	XII	Aconitase; required for the tricarboxylic acid (TCA) cycle and also independently required for mitochondrial genome maintenance; component of the mitochondrial nucleoid; mutation leads to glutamate auxotrophy; human homolog ACO2 can complement yeast null mutant	13755.6	1.75944	4.60309e-138	6
YKR076W	ECM4	protein_coding	XI	S-glutathionyl-(chloro)hydroquinone reductase (GS-HQR); glutathione transferase involved in cell-surface biosynthesis and architecture; catalyzes glutathione (GSH)-dependent reduction of GS-trichloro-p-hydroquinone to trichloro-p-hydroquinone; expression upregulated upon exposure to genotoxic agents, such as methyl methanesulfonate, cisplatin and bleomycin; not an essential gene; similar to YGR15…	282.757	1.75481	3.78624e-52	6
YCR099C		protein_coding	III	Putative protein of unknown function	103.621	1.75474	5.05568e-26	5
YJL108C	PRM10	protein_coding	X	Pheromone-regulated protein; proposed to be involved in mating; predicted to have 5 transmembrane segments; induced by treatment with 8-methoxypsoralen and UVA irradiation	186.836	1.75225	4.59236e-39	5
YMR306W	FKS3	protein_coding	XIII	Protein involved in spore wall assembly; has similarity to 1,3-beta-D-glucan synthase catalytic subunits Fks1p and Gsc2p; the authentic, non-tagged protein is detected in highly purified mitochondria in high-throughput studies	208.12	1.75091	2.50084e-55	6
YBR214W	SDS24	protein_coding	II	Protein involved in cell separation during budding; one of two S. cerevisiae homologs (Sds23p and Sds24p) of the S. pombe Sds23 protein, which is implicated in APC/cyclosome regulation; may play an indirect role in fluid-phase endocytosis; protein abundance increases in response to DNA replication stress; SDS24 has a paralog, SDS23, that arose from the whole genome duplication	703.147	1.74968	7.99465e-59	6
YGL037C	PNC1	protein_coding	VII	Nicotinamidase that converts nicotinamide to nicotinic acid; part of the NAD(+) salvage pathway; required for life span extension by calorie restriction; lacks a peroxisomal targeting signal but is imported into peroxisomes via binding to Gpd1p; PNC1 expression responds to all known stimuli that extend replicative life span; protein increases in abundance and relative distribution to cytoplasmic …	1049.53	1.74945	1.64387e-118	6
YDR059C	UBC5	protein_coding	IV	Ubiquitin-conjugating enzyme; mediates selective degradation of short-lived, abnormal, or excess proteins, including histone H3; central component of the cellular stress response; expression is heat inducible; protein abundance increases in response to DNA replication stress; UBC5 has a paralog, UBC4, that arose from the whole genome duplication	215.399	1.74775	9.7789e-47	6
YDR009W	GAL3	protein_coding	IV	Transcriptional regulator; involved in activation of the GAL genes in response to galactose; forms a complex with Gal80p to relieve Gal80p inhibition of Gal4p; binds galactose and ATP but does not have galactokinase activity; GAL3 has a paralog, GAL1, that arose from the whole genome duplication	101.361	1.74558	1.99482e-25	6
YLR120C	YPS1	protein_coding	XII	Aspartic protease; hyperglycosylated member of the yapsin family of proteases, attached to the plasma membrane via a glycosylphosphatidylinositol (GPI) anchor; involved in nutrient limitation-induced cleavage of the extracellular inhibitory domain of signaling mucin Msb2p, resulting in activation of the filamentous growth MAPK pathway; involved with other yapsins in the cell wall integrity respon…	2753.74	1.74149	3.31769e-190	6
YCR101C		protein_coding	III	Putative protein of unknown function; localizes to the membrane fraction; YCR101C is not an essential gene	138.697	1.73937	3.3444e-30	5
YDR534C	FIT1	protein_coding	IV	Mannoprotein that is incorporated into the cell wall; incorporated via a glycosylphosphatidylinositol (GPI) anchor; involved in the retention of siderophore-iron in the cell wall	125.143	1.73657	3.19181e-32	6
YOR028C	CIN5	protein_coding	XV	Basic leucine zipper (bZIP) transcription factor of the yAP-1 family; physically interacts with the Tup1-Cyc8 complex and recruits Tup1p to its targets; mediates pleiotropic drug resistance and salt tolerance; nuclearly localized under oxidative stress and sequestered in the cytoplasm by Lot6p under reducing conditions; CIN5 has a paralog, YAP6, that arose from the whole genome duplication	209.354	1.7302	2.92512e-41	6
YBR203W	COS111	protein_coding	II	Protein required for antifungal drug ciclopirox olamine resistance; not related to the subtelomerically-encoded COS family; the authentic, non-tagged protein is detected in highly purified mitochondria in high-throughput studies	876.406	1.71102	2.76309e-130	6
YOR062C	YOR062C	protein_coding	XV	Protein of unknown function; similar to Reg1p; expression regulated by glucose and Rgt1p; GFP-fusion protein is induced in response to the DNA-damaging agent MMS; YOR062C has a paralog, YKR075C, that arose from the whole genome duplication	88.1019	1.70639	3.22929e-20	6
YIL108W		protein_coding	IX	Putative metalloendopeptidase; forms cytoplasmic foci upon DNA replication stress	1404	1.70557	3.47299e-147	5
YHR018C	ARG4	protein_coding	VIII	Argininosuccinate lyase; catalyzes the final step in the arginine biosynthesis pathway	1329.7	1.69844	3.12113e-117	5
YOL151W	GRE2	protein_coding	XV	3-methylbutanal reductase and NADPH-dependent methylglyoxal reductase; stress induced (osmotic, ionic, oxidative, heat shock and heavy metals); regulated by the HOG pathway; restores resistance to glycolaldehyde by coupling reduction of glycolaldehyde to ethylene glycol and oxidation of NADPH to NADP+; protein abundance increases in response to DNA replication stress; methylglyoxal reductase (NAD…	1051.75	1.69795	4.5965e-141	1
YPR026W	ATH1	protein_coding	XVI	Acid trehalase required for utilization of extracellular trehalose; involved in intracellular trehalose degradation during growth recovery after saline stress	426.539	1.69417	1.89715e-75	6
YKL051W	SFK1	protein_coding	XI	Plasma membrane protein that may act to generate normal levels of PI4P; may act together with or upstream of Stt4p; at least partially mediates proper localization of Stt4p to the plasma membrane	284.614	1.69381	9.12594e-56	6
YPL250C	ATG41	protein_coding	XVI	Protein of unknown function; required for selective and nonselective autophagy, and mitophagy; regulates the rate of autophagosome formation; interacts with Atg9p, and has a similar peri-mitochondrial localization; elevated Gcn4p-dependent expression under autophagy-inducing conditions; mobilized into polysomes upon a shift from a fermentable to nonfermentable carbon source; potential Cdc28p subs…	243.402	1.68911	2.32713e-64	5
YFR053C	HXK1	protein_coding	VI	Hexokinase isoenzyme 1; a cytosolic protein that catalyzes phosphorylation of glucose during glucose metabolism; expression is highest during growth on non-glucose carbon sources; glucose-induced repression involves hexokinase Hxk2p; HXK1 has a paralog, HXK2, that arose from the whole genome duplication	2189.9	1.68712	4.31073e-26	1
YOR328W	PDR10	protein_coding	XV	ATP-binding cassette (ABC) transporter; multidrug transporter involved in the pleiotropic drug resistance network; regulated by Pdr1p and Pdr3p	925.187	1.68521	9.18829e-139	6
YMR170C	ALD2	protein_coding	XIII	Cytoplasmic aldehyde dehydrogenase; involved in ethanol oxidation and beta-alanine biosynthesis; uses NAD+ as the preferred coenzyme; expression is stress induced and glucose repressed; very similar to Ald3p	152.257	1.68392	1.7105e-43	5
YGL194C-A		protein_coding	VII	Putative protein of unknown function; identified based on comparisons of the genome sequences of six Saccharomyces species; SWAT-GFP and mCherry fusion proteins localize to the endoplasmic reticulum	95.2674	1.68202	7.8302e-21	5
YCR020C	PET18	protein_coding	III	Protein of unknown function; has weak similarity to proteins involved in thiamin metabolism; expression is induced in the absence of thiamin	60.3605	1.66697	7.12578e-14	6
YFL052W		protein_coding	VI	Zinc cluster transcription factor that regulates respiratory growth; binds to promoters of genes involved in respiration, gluconeogenesis, and the glyoxylate shunt; required for normal carbon source utilization and stress response	165.549	1.66485	2.58198e-37	6
YJR109C	CPA2	protein_coding	X	Large subunit of carbamoyl phosphate synthetase; carbamoyl phosphate synthetase catalyzes a step in the synthesis of citrulline, an arginine precursor	2810.53	1.66179	8.69944e-111	5
YNR057C	BIO4	protein_coding	XIV	Dethiobiotin synthetase; catalyzes the third step in the biotin biosynthesis pathway; BIO4 is in a cluster of 3 genes (BIO3, BIO4, and BIO5) that mediate biotin synthesis; BIO3 and BIO4 were acquired by horizontal gene transfer (HGT) from bacteria; expression appears to be repressed at low iron levels	57.7883	1.66169	1.23258e-14	5
YNL144C		protein_coding	XIV	Putative protein of unknown function; non-tagged protein is detected in highly purified mitochondria in high-throughput studies; contains a PH domain and binds phosphatidylinositols and phosphatidylethanolamine in a large-scale study; YNL144C has a paralog, YHR131C, that arose from the whole genome duplication	171.961	1.65987	4.19841e-37	6
YOR384W	FRE5	protein_coding	XV	Putative ferric reductase with similarity to Fre2p; expression induced by low iron levels; the authentic, non-tagged protein is detected in highly purified mitochondria in high-throughput studies	91.2033	1.65617	1.02028e-05	1
YMR280C	CAT8	protein_coding	XIII	Zinc cluster transcriptional activator; necessary for derepression of a variety of genes under non-fermentative growth conditions, active after diauxic shift, binds carbon source responsive elements; relative distribution to the nucleus increases upon DNA replication stress	209.403	1.65554	5.32388e-32	6
YPL154C	PEP4	protein_coding	XVI	Vacuolar aspartyl protease (proteinase A); required for posttranslational precursor maturation of vacuolar proteinases; important for protein turnover after oxidative damage; plays a protective role in acetic acid induced apoptosis; synthesized as a zymogen, self-activates	7739.33	1.65444	1.26701e-211	6
YAL054C	ACS1	protein_coding	I	Acetyl-coA synthetase isoform; along with Acs2p, acetyl-coA synthetase isoform is the nuclear source of acetyl-coA for histone acetylation; expressed during growth on nonfermentable carbon sources and under aerobic conditions	156.648	1.65062	1.1888e-20	6
YOR161C	PNS1	protein_coding	XV	Protein of unknown function; has similarity to Torpedo californica tCTL1p, which is postulated to be a choline transporter, neither null mutation nor overexpression affects choline transport	601.851	1.64438	3.7564e-32	1
YER175C	TMT1	protein_coding	V	Trans-aconitate methyltransferase; cytosolic enzyme that catalyzes the methyl esterification of 3-isopropylmalate, an intermediate of the leucine biosynthetic pathway, and trans-aconitate, which inhibits the citric acid cycle	137.874	1.64195	4.82867e-43	5
YCL042W		protein_coding	III	Putative protein of unknown function; epitope-tagged protein localizes to the cytoplasm	122.3	1.6364	1.01703e-18	6
YLR258W	GSY2	protein_coding	XII	Glycogen synthase; expression induced by glucose limitation, nitrogen starvation, heat shock, and stationary phase; activity regulated by cAMP-dependent, Snf1p and Pho85p kinases as well as by the Gac1p-Glc7p phosphatase; GSY2 has a paralog, GSY1, that arose from the whole genome duplication; relocalizes from cytoplasm to plasma membrane upon DNA replication stress	1510.43	1.63142	3.13298e-86	6
YBR297W	MAL33	protein_coding	II	MAL-activator protein; part of complex locus MAL3; nonfunctional in genomic reference strain S288C	377.324	1.62682	1.0126e-52	6
YER045C	ACA1	protein_coding	V	ATF/CREB family basic leucine zipper (bZIP) transcription factor; binds as a homodimer to the ATF/CREB consensus sequence TGACGTCA; important for carbon source utilization; target genes include GRE2 and COS8; ACA1 has a paralog, CST6, that arose from the whole genome duplication	486.542	1.61978	1.14621e-66	6
YIL107C	PFK26	protein_coding	IX	6-phosphofructo-2-kinase; inhibited by phosphoenolpyruvate and sn-glycerol 3-phosphate; has negligible fructose-2,6-bisphosphatase activity; transcriptional regulation involves protein kinase A	405.565	1.61754	4.92562e-58	6
YKR061W	KTR2	protein_coding	XI	Mannosyltransferase involved in N-linked protein glycosylation; member of the KRE2/MNT1 mannosyltransferase family; KTR2 has a paralog, YUR1, that arose from the whole genome duplication	349.095	1.61567	8.62317e-53	5
YMR104C	YPK2	protein_coding	XIII	Protein kinase similar to S/T protein kinase Ypk1p; functionally redundant with YPK1 at the genetic level; participates in a signaling pathway required for optimal cell wall integrity; involved in the TORC-dependent phosphorylation of ribosomal proteins Rps6a/b (S6); human homolog SGK2 can complement a ypk1 ypk2 double mutant	722.509	1.61528	1.31328e-114	6
YGL045W	RIM8	protein_coding	VII	Protein involved in proteolytic activation of Rim101p; part of response to alkaline pH; interacts with ESCRT-1 subunits Stp22p and Vps28p; essential for anaerobic growth; member of the arrestin-related trafficking adaptor family	237.248	1.61322	1.70047e-47	6
YER053C-A		protein_coding	V	Protein of unknown function; green fluorescent protein (GFP)-fusion protein localizes to the endoplasmic reticulum; protein abundance increases in response to DNA replication stress	363.615	1.60682	3.82585e-13	6
YHL040C	ARN1	protein_coding	VIII	ARN family transporter for siderophore-iron chelates; responsible for uptake of iron bound to ferrirubin, ferrirhodin, and related siderophores; protein increases in abundance and relocalizes to the vacuole upon DNA replication stress	957.462	1.60295	7.7684e-18	6
YMR182C	RGM1	protein_coding	XIII	Putative zinc finger DNA binding transcription factor; contains two N-terminal C2H2 zinc fingers and C-terminal proline rich domain; overproduction impairs cell growth and induces expression of genes involved in monosaccharide catabolism and aldehyde metabolism; regulates expression of of Y' telomeric elements and subtelomeric COS genes; relocalizes to the cytosol in response to hypoxia; RGM1 has…	94.1129	1.60064	5.66842e-20	6
YKL035W	UGP1	protein_coding	XI	UDP-glucose pyrophosphorylase (UGPase); catalyses the reversible formation of UDP-Glc from glucose 1-phosphate and UTP, involved in a wide variety of metabolic pathways, expression modulated by Pho85p through Pho4p; involved in PKA-mediated oxidative stress resistance and long-term survival in stationary phase; UGP1 has a paralog, YHL012W, that arose from the whole genome duplication	4275.11	1.59191	2.06667e-136	6
YOR285W	RDL1	protein_coding	XV	Thiosulfate sulfurtransferase; contains a rhodanese-like domain; localized to the mitochondrial outer membrane; protein abundance increases in response to DNA replication stress; similar to the human TSTD gene	810.961	1.59147	1.39733e-81	6
YKL062W	MSN4	protein_coding	XI	Stress-responsive transcriptional activator; activated in stochastic pulses of nuclear localization in response to various stress conditions; binds DNA at stress response elements of responsive genes, inducing gene expression; involved in diauxic shift	982.26	1.57741	5.36114e-121	6
YMR136W	GAT2	protein_coding	XIII	Protein containing GATA family zinc finger motifs; similar to Gln3p and Dal80p; expression repressed by leucine	316.243	1.56282	1.85617e-36	6
YFL054C	AQY3	protein_coding	VI	Putative channel-like protein; similar to Fps1p; mediates passive diffusion of glycerol in the presence of ethanol	283.97	1.56065	3.76893e-41	6
YHR177W	YHR177W	protein_coding	VIII	Putative transcription factor containing a WOPR domain; binds DNA in vitro; similar to C. albicans Wor1p transcription factor that regulates white-opaque switching; overexpression causes a cell cycle delay or arrest	110.271	1.55946	4.02027e-21	6
YOR193W	PEX27	protein_coding	XV	Peripheral peroxisomal membrane protein; involved in controlling peroxisome size and number, interacts with Pex25p; PEX27 has a paralog, PEX25, that arose from the whole genome duplication	169.045	1.55437	6.15456e-35	5
YOR052C		protein_coding	XV	AN1-type zinc finger protein, effector of proteotoxic stress response; stress-inducible transcriptional target of Rpn4p; induced by nitrogen limitation, weak acid, misfolded proteins; short-lived protein, degraded by proteasome; may protect cells from trivalent metalloid induced proteotoxicity; contains PACE promoter element; ortholog of human AIRAP, which stimulates proteasome activity in respon…	505.896	1.55325	3.65019e-46	6
YJR155W	AAD10	protein_coding	X	Putative aryl-alcohol dehydrogenase; similar to P. chrysosporium aryl-alcohol dehydrogenase; mutational analysis has not yet revealed a physiological role; members of the AAD gene family comprise three pairs (AAD3 + AAD15, AAD6/AAD16 + AAD4, AAD10 + AAD14) whose two genes are more related to one another than to other members of the family	83.5224	1.55156	3.85888e-22	5
YCL030C	HIS4	protein_coding	III	Multifunctional enzyme containing phosphoribosyl-ATP pyrophosphatase; phosphoribosyl-AMP cyclohydrolase, and histidinol dehydrogenase activities; catalyzes the second, third, ninth and tenth steps in histidine biosynthesis	1115.97	1.54578	2.75635e-48	5
YGR189C	CRH1	protein_coding	VII	Chitin transglycosylase; functions in the transfer of chitin to beta(1-6) and beta(1-3) glucans in the cell wall; similar and functionally redundant to Utr2; localizes to sites of polarized growth; expression induced by cell wall stress	10428.1	1.54401	1.23342e-107	6
YJR154W		protein_coding	X	Putative protein of unknown function; green fluorescent protein (GFP)-fusion protein localizes to the cytoplasm	124.996	1.54279	6.10623e-25	6
YMR316W	DIA1	protein_coding	XIII	Protein of unknown function; involved in invasive and pseudohyphal growth; green fluorescent protein (GFP)-fusion protein localizes to the cytoplasm in a punctate pattern	151.109	1.54141	2.19633e-19	6
YGL157W	ARI1	protein_coding	VII	NADPH-dependent aldehyde reductase; utilizes aromatic and alophatic aldehyde substrates; member of the short-chain dehydrogenase/reductase superfamily	880.86	1.54132	2.39922e-116	6
YGL255W	ZRT1	protein_coding	VII	High-affinity zinc transporter of the plasma membrane; responsible for the majority of zinc uptake; transcription is induced under low-zinc conditions by the Zap1p transcription factor	1502.3	1.53735	6.71496e-90	1
YMR122W-A		protein_coding	XIII	Protein of unknown function; green fluorescent protein (GFP)-fusion protein localizes to the cytoplasm and endoplasmic reticulum	3437	1.52706	3.36196e-64	6
YMR062C	ARG7	protein_coding	XIII	Mitochondrial ornithine acetyltransferase; catalyzes the fifth step in arginine biosynthesis; also possesses acetylglutamate synthase activity, regenerates acetylglutamate while forming ornithine	749.313	1.52593	1.1728e-50	5
YMR085W		protein_coding	XIII	Putative protein of unknown function; YMR085W and adjacent ORF YMR084W are merged in related strains, and together are paralogous to glutamine-fructose-6-phosphate amidotransferase GFA1	54.6959	1.52013	4.6693e-15	6
YKR091W	SRL3	protein_coding	XI	GTB motif (G1/S transcription factor binding) containing protein; binds SBF-regulated promoters in hydroxyurea-treated cells; when overexpressed, suppresses the lethality of a rad53 null mutation; potential Cdc28p substrate; SRL3 has a paralog, WHI5, that arose from the whole genome duplication	313.495	1.51877	1.31291e-35	5
YOL016C	CMK2	protein_coding	XV	Calmodulin-dependent protein kinase; may play a role in stress response, many CA++/calmodulan dependent phosphorylation substrates demonstrated in vitro, amino acid sequence similar to mammalian Cam Kinase II; CMK2 has a paralog, CMK1, that arose from the whole genome duplication	463.14	1.51785	2.79674e-52	6
YBR105C	VID24	protein_coding	II	GID Complex regulatory subunit; binds GID Complex in response to glucose through interactions with complex member Vid28p; regulates fructose-1,6-bisphosphatase (FBPase) targeting to the vacuole; promotes proteasome-dependent catabolite degradation of FBPase; peripheral membrane protein located at Vid (vacuole import and degradation) vesicles	756.799	1.51628	9.93563e-62	6
YOR338W		protein_coding	XV	Putative protein of unknown function; YOR338W transcription is regulated by Azf1p and its transcript is a specific target of the G protein effector Scp160p; identified as being required for sporulation in a high-throughput mutant screen; YOR338W has a paralog, FUN19, that arose from the whole genome duplication	136.52	1.51244	4.40534e-16	6
YGR288W	MAL13	protein_coding	VII	MAL-activator protein; part of complex locus MAL1; nonfunctional in genomic reference strain S288C	184.663	1.50676	7.07848e-41	6
YKL161C	KDX1	protein_coding	XI	Protein kinase; implicated in Slt2p mitogen-activated (MAP) kinase signaling pathway; interacts with numerous components in the mating pheromone and CWI MAPK pathways; associates with Rlm1p; KDX1 has a paralog, SLT2, that arose from the whole genome duplication	583.573	1.49849	2.19573e-70	6
YLR297W		protein_coding	XII	Protein of unknown function; green fluorescent protein (GFP)-fusion protein localizes to the vacuole; not an essential gene; induced by treatment with 8-methoxypsoralen and UVA irradiation; relocalizes from nucleus to vacuole upon DNA replication stress; YLR297W has a paralog, YOR186W, that arose from the whole genome duplication	93.9986	1.49824	1.63506e-19	6
YGR065C	VHT1	protein_coding	VII	High-affinity plasma membrane H+-biotin (vitamin H) symporter; mutation results in fatty acid auxotrophy; 12 transmembrane domain containing major facilitator subfamily member; mRNA levels negatively regulated by iron deprivation and biotin	779.868	1.49771	3.27535e-79	6
YJL082W	IML2	protein_coding	X	Protein required for clearance of inclusion bodies; localizes to the inclusion bodies formed under protein misfolding stress; the authentic, non-tagged protein is detected in highly purified mitochondria in high-throughput studies; protein abundance increases in response to DNA replication stress; IML2 has a paralog, YKR018C, that arose from the whole genome duplication	1487.42	1.49728	1.55358e-135	6
YBR230C	OM14	protein_coding	II	Mitochondrial outer membrane receptor for cytosolic ribosomes; integral protein of the outer membrane that interacts with the nascent chain-associated complex (NAC) bound to ribosomes, contributing to co-translational mitochondrial import; interacts with porin (Por1p) and Om45p; abundance is decreased in cells grown in glucose relative to other carbon sources	386.861	1.49645	1.26568e-58	6
YBR241C		protein_coding	II	Putative transporter, member of the sugar porter family; green fluorescent protein (GFP)-fusion protein localizes to the vacuolar membrane; YBR241C is not an essential gene; YBR241C has a paralog, VPS73, that arose from the whole genome duplication	346.575	1.49387	6.44388e-51	6
YJR127C	RSF2	protein_coding	X	Zinc-finger protein; involved in transcriptional control of both nuclear and mitochondrial genes, many of which specify products required for glycerol-based growth, respiration, and other functions; RSF2 has a paralog, TDA9, that arose from the whole genome duplication; relocalizes from nucleus to cytoplasm upon DNA replication stress	823.05	1.49008	6.12426e-81	6
YLR142W	PUT1	protein_coding	XII	Proline oxidase; nuclear-encoded mitochondrial protein involved in utilization of proline as sole nitrogen source; PUT1 transcription is induced by Put3p in the presence of proline and the absence of a preferred nitrogen source	545.737	1.48993	1.51118e-50	6
YBL078C	ATG8	protein_coding	II	Component of autophagosomes and Cvt vesicles; regulator of Atg1p, targets it to autophagosomes; binds the Atg1p-Atg13p complex, triggering its vacuolar degradation; unique ubiquitin-like protein whose conjugation target is lipid phosphatidylethanolamine (PE); Atg8p-PE is anchored to membranes, is involved in phagophore expansion, and may mediate membrane fusion during autophagosome formation; dec…	113.938	1.48948	1.50795e-15	5
YPL222W	FMP40	protein_coding	XVI	Putative protein of unknown function; proposed to be involved in responding to environmental stresses; the authentic, non-tagged protein is detected in highly purified mitochondria in high-throughput studies	314.176	1.4877	6.3242e-42	6
YML100W	TSL1	protein_coding	XIII	Large subunit of trehalose 6-phosphate synthase/phosphatase complex; Tps1p-Tps2p complex converts uridine-5'-diphosphoglucose and glucose 6-phosphate to trehalose; contributes to survival to acute lethal heat stress; mutant has aneuploidy tolerance; protein abundance increases in response to DNA replication stress; TSL1 has a paralog, TPS3, that arose from the whole genome duplication	1736.28	1.4823	1.75523e-41	6
YHR097C		protein_coding	VIII	Putative protein of unknown function; green fluorescent protein (GFP)-fusion protein localizes to the cytoplasm and the nucleus; YHR097C has a paralog, PAL1, that arose from the whole genome duplication	303.773	1.48192	5.09965e-28	6
YJR130C	STR2	protein_coding	X	Cystathionine gamma-synthase, converts cysteine into cystathionine; STR2 has a paralog, YML082W, that arose from the whole genome duplication	340.386	1.48111	9.7641e-49	5
YLR356W	ATG33	protein_coding	XII	Mitochondrial mitophagy-specific protein; required primarily for mitophagy induced at post-log phase; not required for other types of selective autophagy or macroautophagy; conserved within fungi, but not in higher eukaryotes; ATG33 has a paralog, SCM4, that arose from the whole genome duplication	389.08	1.47994	3.12837e-54	6
YBR284W		protein_coding	II	Putative metallo-dependent hydrolase superfamily protein; similar to AMP deaminases but lacks key catalytic residues and does not rescue purine nucleotide metabolic defect of quadruple aah1 ade8 amd1 his1 mutant; null mutant exhibits longer telomeres, altered Ty mobility, decreased resistance to rapamycin and wortmannin; induced in response to hydrostatic pressure; not an essential gene; YBR284W …	80.6308	1.47852	7.12318e-17	6
YBR006W	UGA2	protein_coding	II	Succinate semialdehyde dehydrogenase; involved in the utilization of gamma-aminobutyrate (GABA) as a nitrogen source; part of the 4-aminobutyrate and glutamate degradation pathways; localized to the cytoplasm	198.469	1.47742	8.6931e-36	6
YOL152W	FRE7	protein_coding	XV	Putative ferric reductase with similarity to Fre2p; expression induced by low copper levels	111.841	1.47438	2.71211e-06	6
YPL214C	THI6	protein_coding	XVI	Thiamine-phosphate diphosphorylase and hydroxyethylthiazole kinase; required for thiamine biosynthesis; GFP-fusion protein localizes to the cytoplasm in a punctate pattern	290.75	1.47307	1.93749e-44	6
YGR149W	GPC1	protein_coding	VII	Glycerophosphocholine acyltransferase (GPCAT); involved in in phosphatidylcholine (PC) synthesis; uses acetyl-CoA to acylate glycero-3-phosphocholine to yield lyso-PC; also catalyzes acylation of glycerophosphoethanolamine with acyl-CoA; predicted to be an integal membrane protein	842.525	1.46833	3.9678e-101	6
YOR136W	IDH2	protein_coding	XV	Subunit of mitochondrial NAD(+)-dependent isocitrate dehydrogenase; complex catalyzes the oxidation of isocitrate to alpha-ketoglutarate in the TCA cycle; phosphorylated	3030.45	1.46136	3.43864e-112	6
YLR174W	IDP2	protein_coding	XII	Cytosolic NADP-specific isocitrate dehydrogenase; catalyzes oxidation of isocitrate to alpha-ketoglutarate; levels are elevated during growth on non-fermentable carbon sources and reduced during growth on glucose; IDP2 has a paralog, IDP3, that arose from the whole genome duplication	65.2506	1.45064	2.38577e-13	6
YJL107C		protein_coding	X	Putative protein of unknown function; expression is induced by activation of the HOG1 mitogen-activated signaling pathway and this induction is Hog1p/Pbs2p dependent; YJL107C and adjacent ORF, YJL108C are merged in related fungi	233.541	1.44952	3.32987e-32	5
YDR044W	HEM13	protein_coding	IV	Coproporphyrinogen III oxidase; oxygen-requiring enzyme that catalyzes sixth step in heme biosynthetic pathway; transcription is repressed by oxygen and heme (via Rox1p and Hap1p); human homolog CPOX can complement yeast mutant and allow growth of haploid null after sporulation of a heterozygous diploid	1386.95	1.44939	9.35838e-153	6
YOR289W		protein_coding	XV	Putative protein of unknown function; transcription induced by the unfolded protein response; green fluorescent protein (GFP)-fusion protein localizes to both the cytoplasm and the nucleus	78.7393	1.445	2.54185e-12	6
YDR019C	GCV1	protein_coding	IV	T subunit of the mitochondrial glycine decarboxylase complex; glycine decarboxylase is required for the catabolism of glycine to 5,10-methylene-THF; expression is regulated by levels of levels of 5,10-methylene-THF in the cytoplasm	570.2	1.44199	6.0879e-64	6
YLR414C	PUN1	protein_coding	XII	Plasma membrane protein with a role in cell wall integrity; co-localizes with Sur7p in punctate membrane patches; null mutant displays decreased thermotolerance; transcription induced upon cell wall damage and metal ion stress	869.428	1.43766	1.12598e-77	6
YDL127W	PCL2	protein_coding	IV	Cyclin, interacts with cyclin-dependent kinase Pho85p; member of the Pcl1,2-like subfamily, involved in the regulation of polarized growth and morphogenesis and progression through the cell cycle; localizes to sites of polarized cell growth; PCL2 has a paralog, PCL9, that arose from the whole genome duplication	237.384	1.43753	2.91978e-37	5
YEL047C		protein_coding	V	Soluble fumarate reductase; required with isoenzyme Osm1p for anaerobic growth; may interact with ribosomes, based on co-purification experiments; authentic, non-tagged protein is detected in purified mitochondria in high-throughput studies; similar to Arxula adeninovorans fumarate reductase; protein abundance increases in response to DNA replication stress; FRD1 has a paralog, OSM1, that arose f…	1202.03	1.43714	8.78803e-53	6
YOR273C	TPO4	protein_coding	XV	Polyamine transporter of the major facilitator superfamily; member of the 12-spanner drug:H(+) antiporter DHA1 family; recognizes spermine, putrescine, and spermidine; localizes to the plasma membrane	946.982	1.43633	1.53864e-45	6
YKL104C	GFA1	protein_coding	XI	Glutamine-fructose-6-phosphate amidotransferase; catalyzes the formation of glucosamine-6-P and glutamate from fructose-6-P and glutamine in the first step of chitin biosynthesis; GFA1 has a paralogous region, comprising ORFs YMR084W-YMR085W, that arose from the whole genome duplication	8404.78	1.43308	1.17709e-180	5
YDR040C	ENA1	protein_coding	IV	P-type ATPase sodium pump; involved in Na+ and Li+ efflux to allow salt tolerance	323.764	1.43253	6.83912e-32	6
YLR438W	CAR2	protein_coding	XII	L-ornithine transaminase (OTAse); catalyzes the second step of arginine degradation, expression is dually-regulated by allophanate induction and a specific arginine induction process; not nitrogen catabolite repression sensitive; protein abundance increases in response to DNA replication stress; human homolog OAT complements yeast null mutant	1169.99	1.42775	1.08015e-49	6
YJL088W	ARG3	protein_coding	X	Ornithine carbamoyltransferase; also known as carbamoylphosphate:L-ornithine carbamoyltransferase; catalyzes the biosynthesis of the arginine precursor citrulline	129.574	1.42671	7.59095e-16	5
YHR043C	DOG2	protein_coding	VIII	2-deoxyglucose-6-phosphate phosphatase; member of a family of low molecular weight phosphatases, induced by oxidative and osmotic stress, confers 2-deoxyglucose resistance when overexpressed; DOG2 has a paralog, DOG1, that arose from a single-locus duplication; the last half of DOG1 and DOG2 are subject to gene conversions among S. cerevisiae, S. paradoxus, and S. mikatae	307.332	1.4251	3.46697e-42	6
YPL088W		protein_coding	XVI	Putative aryl alcohol dehydrogenase; transcription is activated by paralogous transcription factors Yrm1p and Yrr1p along with genes involved in multidrug resistance	319.926	1.42298	2.15281e-44	5
YBR298C	MAL31	protein_coding	II	Maltose permease; high-affinity maltose transporter (alpha-glucoside transporter); encoded in the MAL3 complex locus; member of the 12 transmembrane domain superfamily of sugar transporters; functional in genomic reference strain S288C	265.082	1.42293	8.9025e-31	6
YOR173W	DCS2	protein_coding	XV	m(7)GpppX pyrophosphatase regulator; non-essential, stress induced regulatory protein; modulates m7G-oligoribonucleotide metabolism; inhibits Dcs1p; regulated by Msn2p, Msn4p, and the Ras-cAMP-cAPK signaling pathway; mutant has increased aneuploidy tolerance; DCS2 has a paralog, DCS1, that arose from the whole genome duplication	109.948	1.42162	2.55687e-11	6
YHR049W	FSH1	protein_coding	VIII	Putative serine hydrolase; localizes to both the nucleus and cytoplasm; sequence is similar to S. cerevisiae Fsh2p and Fsh3p and the human candidate tumor suppressor OVCA2	1383.9	1.42019	2.34749e-146	6
YMR198W	CIK1	protein_coding	XIII	Kinesin-associated protein; required for both karyogamy and mitotic spindle organization, interacts stably and specifically with Kar3p and may function to target this kinesin to a specific cellular role; locus encodes a long and short transcript with differing functions; CIK1 has a paralog, VIK1, that arose from the whole genome duplication	273.473	1.41477	1.88793e-42	5
YGR244C	LSC2	protein_coding	VII	Beta subunit of succinyl-CoA ligase; succinyl-CoA ligase is a mitochondrial enzyme of the TCA cycle that catalyzes the nucleotide-dependent conversion of succinyl-CoA to succinate	1146.69	1.41473	4.8086e-126	6
YDL110C	TMA17	protein_coding	IV	ATPase dedicated chaperone that adapts proteasome assembly to stress; Tma17p is induced upon stress; interacts with Rpt6p to assist its pairing to Rpt3p and early steps in proteasome biogenesis; associates with ribosomes; heterozygous deletion demonstrated increases in chromosome instability in a rad9 deletion background; protein abundance is decreased upon intracellular iron depletion	245.157	1.41313	5.79102e-34	6
YDR001C	NTH1	protein_coding	IV	Neutral trehalase, degrades trehalose; required for thermotolerance and may mediate resistance to other cellular stresses; phosphorylated and activated by Cdc28p at the G1/S phase transition to coordinately regulate carbohydrate metabolism and the cell cycle; inhibited by Dcs1p; NTH1 has a paralog, NTH2, that arose from the whole genome duplication	1169.59	1.41141	8.0074e-71	6
YNL045W	LAP2	protein_coding	XIV	Leucyl aminopeptidase yscIV with epoxide hydrolase activity; metalloenzyme containing one zinc atom; green fluorescent protein (GFP)-fusion protein localizes to the cytoplasm and nucleus; also known as leukotriene A4 hydrolase	1759.33	1.41104	7.45935e-104	6
YOL122C	SMF1	protein_coding	XV	Divalent metal ion transporter; broad specificity for di-valent and tri-valent metals; post-translationally regulated by levels of metal ions; member of the Nramp family of metal transport proteins	1033.1	1.41051	1.09547e-55	6
YKL133C		protein_coding	XI	Putative protein of unknown function; not required for growth of cells lacking the mitochondrial genome; SWAT-GFP and mCherry fusion proteins localize to the mitochondria; YKL133C has a paralog, MGR3, that arose from the whole genome duplication	70.9291	1.41005	1.17634e-12	6
YBR139W		protein_coding	II	Putative serine type carboxypeptidase; role in phytochelatin synthesis; green fluorescent protein (GFP)-fusion protein localizes to the vacuole; expression induced by nitrogen limitation in a GLN3, GAT1-independent manner	2205.82	1.40766	1.37709e-119	6
YKL189W	HYM1	protein_coding	XI	Component of the RAM signaling network; is involved in regulation of Ace2p activity and cellular morphogenesis, interacts with Kic1p and Sog2p, localizes to sites of polarized growth during budding and during the mating response	150.113	1.40708	1.4241e-24	5
YLR251W	SYM1	protein_coding	XII	Protein required for ethanol metabolism; induced by heat shock and localized to the inner mitochondrial membrane; homologous to mammalian peroxisomal membrane protein Mpv17; human homolog MPV17 is implicated in hepatocerebral mtDNA depletion syndromes (MDDS), and complements yeast null mutant	87.6228	1.40267	2.34619e-16	6
YLR152C		protein_coding	XII	Putative protein of unknown function; YLR152C is not an essential gene	276.079	1.3937	2.93132e-32	6
YMR251W-A	HOR7	protein_coding	XIII	Protein of unknown function; overexpression suppresses Ca2+ sensitivity of mutants lacking inositol phosphorylceramide mannosyltransferases Csg1p and Csh1p; transcription is induced under hyperosmotic stress and repressed by alpha factor; HOR7 has a paralog, DDR2, that arose from the whole genome duplication	1526.63	1.3923	1.41332e-75	6
YDR178W	SDH4	protein_coding	IV	Membrane anchor subunit of succinate dehydrogenase (SDH); involved in coupling the oxidation of succinate to the transfer of electrons to ubiquinone as part of the TCA cycle and the mitochondrial respiratory chain; has similarity to human SDH subunit D (SDHD), which is implicated in paraganglioma	926.921	1.38966	8.98335e-62	6
YLR037C	PAU23	protein_coding	XII	Cell wall mannoprotein; has similarity to Tir1p, Tir2p, Tir3p, and Tir4p; member of the seripauperin multigene family encoded mainly in subtelomeric regions; expressed under anaerobic conditions, completely repressed during aerobic growth	52.5635	1.38414	8.73034e-11	6
YPL135W	ISU1	protein_coding	XVI	Conserved protein of the mitochondrial matrix; performs a scaffolding function during assembly of iron-sulfur clusters, interacts physically and functionally with yeast frataxin (Yfh1p); ISU1 has a paralog, ISU2, that arose from the whole genome duplication; isu1 isu2 double mutant is inviable; human homolog ISCU implicated in mitochondrial myopathy, can complement isu1 isu2 double mutant	1167.87	1.38222	1.96975e-46	6
YLL039C	UBI4	protein_coding	XII	Ubiquitin; becomes conjugated to proteins, marking them for selective degradation via the ubiquitin-26S proteasome system; essential for the cellular stress response; encoded as a polyubiquitin precursor comprised of 5 head-to-tail repeats; protein abundance increases in response to DNA replication stress	936.12	1.38173	5.34491e-64	6
YJL132W		protein_coding	X	Putative protein of unknown function; localizes to the membrane fraction; possible Zap1p-regulated target gene induced by zinc deficiency; YJL132W is a non-essential gene	269.311	1.37876	2.98098e-37	6
YLR058C	SHM2	protein_coding	XII	Cytosolic serine hydroxymethyltransferase; converts serine to glycine plus 5,10 methylenetetrahydrofolate; major isoform involved in generating precursors for purine, pyrimidine, amino acid, and lipid biosynthesis	5475.08	1.37846	2.0894e-83	6
YAL060W	BDH1	protein_coding	I	NAD-dependent (R,R)-butanediol dehydrogenase; catalyzes oxidation of (R,R)-2,3-butanediol to (3R)-acetoin, oxidation of meso-butanediol to (3S)-acetoin, and reduction of acetoin; enhances use of 2,3-butanediol as an aerobic carbon source	1018.96	1.37735	9.18864e-56	6
YDR516C	EMI2	protein_coding	IV	Non-essential protein of unknown function; required for transcriptional induction of the early meiotic-specific transcription factor IME1; required for sporulation; expression regulated by glucose-repression transcription factors Mig1/2p; EMI2 has a paralog, GLK1, that arose from the whole genome duplication; protein abundance increases in response to DNA replication stress	1219.16	1.3759	3.12727e-102	6
YMR194C-B	CMC4	protein_coding	XIII	Protein that localizes to the mitochondrial intermembrane space; localizes via the Mia40p-Erv1p system; contains twin cysteine-x(9)-cysteine motifs	70.4633	1.37341	3.52069e-12	6
YDL119C	HEM25	protein_coding	IV	Mitochondrial glycine transporter; required for the transport of glycine into mitochondria for initiation of heme biosynthesis, with YMC1 acting as a secondary transporter; homolog of human SLC25A38, a mitochondrial glycine transporter associated with nonsyndromic autosomal recessive congenital sideroblastic anemia; human SLC25A38 can complement the heme deficiency associated with the null mutant…	184.075	1.37267	7.08188e-23	5
YNL125C	ESBP6	protein_coding	XIV	Protein with similarity to monocarboxylate permeases; appears not to be involved in transport of monocarboxylates such as lactate, pyruvate or acetate across the plasma membrane	860.327	1.36344	3.53819e-63	6
YER069W	ARG5,6	protein_coding	V	Acetylglutamate kinase and N-acetyl-gamma-glutamyl-phosphate reductase; N-acetyl-L-glutamate kinase (NAGK) catalyzes the 2nd and N-acetyl-gamma-glutamyl-phosphate reductase (NAGSA), the 3rd step in arginine biosynthesis; synthesized as a precursor which is processed in the mitochondrion to yield mature NAGK and NAGSA; enzymes form a metabolon complex with Arg2p; NAGK C-terminal domain stabilizes …	1311.36	1.36208	4.2062e-55	5
YIL111W	COX5B	protein_coding	IX	Subunit Vb of cytochrome c oxidase; cytochrome c oxidase is the terminal member of the mitochondrial inner membrane electron transport chain; Cox5Bp is predominantly expressed during anaerobic growth while its isoform Va (Cox5Ap) is expressed during aerobic growth; COX5B has a paralog, COX5A, that arose from the whole genome duplication	231.417	1.36157	6.20468e-20	6
YBL029W		protein_coding	II	Non-essential protein of unknown function	91.0223	1.35505	3.36407e-17	6
YOR192C	THI72	protein_coding	XV	Transporter of thiamine or related compound; contributes to uptake of 5-aminoimidazole-4-carboxamide-1-beta-D-ribofuranoside (acadesine); shares sequence similarity with Thi7p	121.214	1.35392	1.87661e-18	6
YNR001C	CIT1	protein_coding	XIV	Citrate synthase; catalyzes the condensation of acetyl coenzyme A and oxaloacetate to form citrate; the rate-limiting enzyme of the TCA cycle; nuclear encoded mitochondrial protein; CIT1 has a paralog, CIT2, that arose from the whole genome duplication	1763.92	1.35194	1.48339e-95	6
YPL221W	FLC1	protein_coding	XVI	Flavin adenine dinucleotide transporter; required for uptake of FAD into endoplasmic reticulum; involved in cell wall maintenance; FLC1 has a paralog, FLC3, that arose from the whole genome duplication	2417.49	1.35072	5.32208e-61	6
YLR452C	SST2	protein_coding	XII	GTPase-activating protein for Gpa1p; regulates desensitization to alpha factor pheromone; also required to prevent receptor-independent signaling of the mating pathway; member of the RGS (regulator of G-protein signaling) family	1142.5	1.35062	2.39837e-33	5
YGL096W	TOS8	protein_coding	VII	Homeodomain-containing protein and putative transcription factor; found associated with chromatin; target of SBF transcription factor; induced during meiosis and under cell-damaging conditions; TOS8 has a paralog, CUP9, that arose from the whole genome duplication	60.4567	1.35028	3.55791e-10	6
YNL092W		protein_coding	XIV	S-adenosylmethionine-dependent protein methyltransferase; capable of automethylation; member of the seven beta-strand family; YNL092W is not an essential gene	61.1313	1.34979	4.17327e-12	6
YDL049C	KNH1	protein_coding	IV	Protein with similarity to Kre9p; Kre9p is involved in cell wall beta 1,6-glucan synthesis; overproduction suppresses growth defects of a kre9 null mutant; required for propionic acid resistance	69.9286	1.34954	2.66241e-13	6
YLR300W	EXG1	protein_coding	XII	Major exo-1,3-beta-glucanase of the cell wall; involved in cell wall beta-glucan assembly; exists as three differentially glycosylated isoenzymes; EXG1 has a paralog, SPR1, that arose from the whole genome duplication	16996.4	1.34906	9.62935e-105	6
YJL106W	IME2	protein_coding	X	Serine/threonine protein kinase involved in activation of meiosis; associates with Ime1p and mediates its stability, activates Ndt80p; IME2 expression is positively regulated by Ime1p; human CDK2 can complement ime2 null mutant	82.6703	1.34895	1.73549e-13	6
YNL192W	CHS1	protein_coding	XIV	Chitin synthase I; requires activation from zymogenic form in order to catalyze the transfer of N-acetylglucosamine (GlcNAc) to chitin; required for repairing the chitin septum during cytokinesis; transcription activated by mating factor	3246.81	1.34577	4.68386e-98	6
YHR033W		protein_coding	VIII	Putative protein of unknown function; epitope-tagged protein localizes to the cytoplasm; YHR033W has a paralog, PRO1, that arose from the whole genome duplication	516.016	1.33809	6.11671e-29	6
YMR291W	TDA1	protein_coding	XIII	Protein kinase of unknown cellular role; green fluorescent protein (GFP)-fusion protein localizes to the cytoplasm and nucleus; null mutant is sensitive to expression of the top1-T722A allele; not an essential gene; relocalizes from nucleus to cytoplasm upon DNA replication stress	972.348	1.33746	1.86778e-47	6
YPL058C	PDR12	protein_coding	XVI	Plasma membrane ATP-binding cassette (ABC) transporter; weak-acid-inducible multidrug transporter required for weak organic acid resistance; induced by sorbate and benzoate and regulated by War1p; mutants exhibit sorbate hypersensitivity	3731.26	1.33281	2.31311e-33	6
YPR159W	KRE6	protein_coding	XVI	Type II integral membrane protein; required for beta-1,6 glucan biosynthesis; putative beta-glucan synthase; localizes to ER, plasma membrane, sites of polarized growth and secretory vesicles; functionally redundant with Skn1p; KRE6 has a paralog, SKN1, that arose from the whole genome duplication	5688.09	1.3251	7.84061e-110	6
YLR194C	NCW2	protein_coding	XII	Structural constituent of the cell wall; attached to the plasma membrane by a GPI-anchor; expression is upregulated in response to cell wall stress; null mutant is sensitive to the antifungal agent polyhexamethylene biguanide, resistant to zymolyase treatment and has increased chitin deposition	1522.08	1.32318	3.83397e-55	5
YOR378W	AMF1	protein_coding	XV	Low affinity NH4+ transporter; member of the DHA2 family of drug:H+ anti porters; putative paralog of ATR1; but not required for boron tolerance; non-essential gene	99.9821	1.31968	1.74364e-15	6
YJL077W-B		protein_coding	X	Putative protein of unknown function; identified by gene-trapping, microarray-based expression analysis, and genome-wide homology searching	696.583	1.31283	4.19834e-58	6
YFR018C		protein_coding	VI	Putative protein of unknown function; SWAT-GFP and seamless GFP fusion proteins localize to the endoplasmic reticulum and mCherry fusion protein localizes to the vacuole	636.508	1.30882	5.27627e-38	6
YJL163C		protein_coding	X	Putative protein of unknown function	168.98	1.30384	1.11913e-24	6
YIL023C	YKE4	protein_coding	IX	Zinc transporter; localizes to the ER; null mutant is sensitive to calcofluor white, leads to zinc accumulation in cytosol; ortholog of the mouse KE4 and member of the ZIP (ZRT, IRT-like Protein) family	887.526	1.30286	1.59778e-54	5
YJR008W	MHO1	protein_coding	X	Protein of unknown function; inhibits haploid invasive growth when overexpressed; synthetically lethal with phospholipase C (PLC1); expression induced by mild heat-stress on a non-fermentable carbon source, upon entry into stationary phase and upon nitrogen deprivation; repressed by inosine and choline in an Opi1p-dependent manner; highly conserved from bacteria to human; Memo, the human homolog,…	128.51	1.3009	6.6335e-14	6
YOL119C	MCH4	protein_coding	XV	Protein with similarity to mammalian monocarboxylate permeases; monocarboxylate permeases are involved in transport of monocarboxylic acids across the plasma membrane but mutant is not deficient in monocarboxylate transport	626.71	1.29888	1.85985e-70	6
YJR151C	DAN4	protein_coding	X	Cell wall mannoprotein; has similarity to Tir1p, Tir2p, Tir3p, and Tir4p; expressed under anaerobic conditions, completely repressed during aerobic growth	98.7786	1.29421	9.9547e-14	6
YDL181W	INH1	protein_coding	IV	Protein that inhibits ATP hydrolysis by the F1F0-ATP synthase; inhibitory function is enhanced by stabilizing proteins Stf1p and Stf2p; has a calmodulin-binding motif and binds calmodulin in vitro; INH1 has a paralog, STF1, that arose from the whole genome duplication	608.054	1.29289	9.61936e-50	6
YBR256C	RIB5	protein_coding	II	Riboflavin synthase; catalyzes the last step of the riboflavin biosynthesis pathway	387.912	1.28813	4.71978e-39	5
YDL072C	YET3	protein_coding	IV	Protein of unknown function; YET3 null mutant decreases the level of secreted invertase; homolog of human BAP31 protein; protein abundance increases in response to DNA replication stress	1160.02	1.2832	2.09309e-74	6
YGR110W	CLD1	protein_coding	VII	Mitochondrial cardiolipin-specific phospholipase; functions upstream of Taz1p to generate monolyso-cardiolipin; transcription increases upon genotoxic stress; involved in restricting Ty1 transposition; has homology to mammalian CGI-58	99.3607	1.27601	2.28433e-15	6
YOR317W	FAA1	protein_coding	XV	Long chain fatty acyl-CoA synthetase; activates fatty acids with a preference for C12:0-C16:0 chain lengths; role in the competitive import of long-chain fatty acids and sphingoid long-chain bases; accounts for most acyl-CoA synthetase activity; localizes to lipid particles and the plasma membrane; role in sphingolipid-to-glycerolipid metabolism; forms ER foci upon replication stress; faa1 faa4 d…	2789	1.27374	9.17201e-136	6
YBL016W	FUS3	protein_coding	II	Mitogen-activated serine/threonine protein kinase involved in mating; phosphoactivated by Ste7p; substrates include Ste12p, Far1p, Bni1p, Sst2p; inhibits invasive growth during mating by phosphorylating Tec1p, promoting its; inhibits recruitment of Ste5p, Cdc42p-mediated asymmetry and mating morphogenesis	555.273	1.26934	5.45932e-38	5
YGL089C	MF(ALPHA)2	protein_coding	VII	Mating pheromone alpha-factor, made by alpha cells; interacts with mating type a cells to induce cell cycle arrest and other responses leading to mating; also encoded by MF(ALPHA)1, which is more highly expressed; binds copper(II) ions	2440.32	1.26933	3.00809e-13	3
YNL014W	HEF3	protein_coding	XIV	Translational elongation factor EF-3; member of the ABC superfamily; stimulates EF-1 alpha-dependent binding of aminoacyl-tRNA by the ribosome; normally expressed in zinc deficient cells; HEF3 has a paralog, YEF3, that arose from the whole genome duplication	150.125	1.26667	1.55771e-19	6
YJR096W		protein_coding	X	Xylose and arabinose reductase; member of the aldo-keto reductase (AKR) family; GFP-fusion protein is induced in response to the DNA-damaging agent MMS	138.171	1.26412	1.87955e-18	6
YBR295W	PCA1	protein_coding	II	Cadmium transporting P-type ATPase; may also have a role in copper and iron homeostasis; stabilized by Cd binding, which prevents ubiquitination; S288C and other lab strains contain a G970R mutation which eliminates Cd transport function	807.851	1.2631	2.49002e-66	6
YAL040C	CLN3	protein_coding	I	G1 cyclin involved in cell cycle progression; activates Cdc28p kinase to promote G1 to S phase transition; plays a role in regulating transcription of other G1 cyclins, CLN1 and CLN2; regulated by phosphorylation and proteolysis; acetyl-CoA induces CLN3 transcription in response to nutrient repletion to promote cell-cycle entry; cell cycle arrest phenotype of the cln1 cln2 cln3 triple null mutant…	1671.17	1.25623	7.95801e-53	5
YBR092C	PHO3	protein_coding	II	Constitutively expressed acid phosphatase similar to Pho5p; brought to the cell surface by transport vesicles; hydrolyzes thiamin phosphates in the periplasmic space, increasing cellular thiamin uptake; expression is repressed by thiamin	2431.85	1.25417	2.65382e-68	6
YLR460C		protein_coding	XII	Member of the quinone oxidoreductase family; up-regulated in response to the fungicide mancozeb; possibly up-regulated by iodine	55.7249	1.25213	5.84573e-08	6
YJL158C	CIS3	protein_coding	X	Mannose-containing glycoprotein constituent of the cell wall; member of the PIR (proteins with internal repeats) family	7006.1	1.25025	1.25532e-88	6
YJR116W	TDA4	protein_coding	X	Putative protein of unknown function; null mutant is sensitive to expression of the top1-T722A allele	342.161	1.24512	4.55531e-42	6
YGR070W	ROM1	protein_coding	VII	Guanine nucleotide exchange factor (GEF) for Rho1p; mutations are synthetically lethal with mutations in rom2, which also encodes a GEP; ROM1 has a paralog, ROM2, that arose from the whole genome duplication	331.324	1.24354	5.43505e-24	6
Q0045	COX1	protein_coding	Mito	Subunit I of cytochrome c oxidase (Complex IV); Complex IV is the terminal member of the mitochondrial inner membrane electron transport chain; one of three mitochondrially-encoded subunits	3656.28	1.24154	1.75924e-69	6
YER053C	PIC2	protein_coding	V	Mitochondrial copper and phosphate carrier; imports copper and inorganic phosphate into mitochondria; functionally redundant with Mir1p but less abundant than Mir1p under normal conditions; expression is induced at high temperature	287.608	1.23933	1.85068e-28	6
YKL096W-A	CWP2	protein_coding	XI	Covalently linked cell wall mannoprotein; major constituent of the cell wall; plays a role in stabilizing the cell wall; involved in low pH resistance; precursor is GPI-anchored	19376.9	1.23819	5.54533e-107	6
YPL067C		protein_coding	XVI	Putative protein of unknown function; green fluorescent protein (GFP)-fusion protein localizes to the cytoplasm; YPL067C is not an essential gene	277.703	1.23504	6.49917e-32	6
YGL010W	MPO1	protein_coding	VII	Protein involved in metabolism of phytosphingosine; not an essential gene	80.9134	1.23461	2.53264e-14	6
YGR146C	ECL1	protein_coding	VII	Protein of unknown function; mitochondrial-dependent role in the extension of chronological lifespan; overexpression increases oxygen consumption and respiratory activity while deletion results in reduced oxygen consumption under conditions of caloric restriction; induced by iron homeostasis transcription factor Aft2p; multicopy suppressor of temperature sensitive hsf1 mutant; induced by treatmen…	831.232	1.22663	3.09656e-38	5
YBR023C	CHS3	protein_coding	II	Chitin synthase III; catalyzes the transfer of N-acetylglucosamine (GlcNAc) to chitin; required for synthesis of the majority of cell wall chitin, the chitin ring during bud emergence, and spore wall chitosan; contains overlapping di-leucine and di-acidic signals that mediate, respectively, intracellular trafficking by AP-1 and trafficking to plasma membrane by exomer complex; requires AP-3 compl…	4450.46	1.22163	9.45162e-86	5
YHL028W	WSC4	protein_coding	VIII	Endoplasmic reticulum (ER) membrane protein; involved in the translocation of soluble secretory proteins and insertion of membrane proteins into the ER membrane; may also have a role in the stress response but has only partial functional overlap with WSC1-3	291.309	1.21988	6.43363e-18	6
YCR021C	HSP30	protein_coding	III	Negative regulator of the H(+)-ATPase Pma1p; stress-responsive protein; hydrophobic plasma membrane localized; induced by heat shock, ethanol treatment, weak organic acid, glucose limitation, and entry into stationary phase	50.3848	1.21544	0.00139537	6
YKR075C		protein_coding	XI	Protein of unknown function; similar to Reg1p; expression regulated by glucose and Rgt1p; GFP-fusion protein is induced in response to the DNA-damaging agent MMS; YKR075C has a paralog, YOR062C, that arose from the whole genome duplication	170.634	1.21365	1.13917e-20	6
YBR145W	ADH5	protein_coding	II	Alcohol dehydrogenase isoenzyme V; involved in ethanol production; ADH5 has a paralog, ADH1, that arose from the whole genome duplication	137.443	1.21221	2.39557e-19	5
YER184C	TOG1	protein_coding	V	Transcriptional activator of oleate genes; regulates genes involved in fatty acid utilization; zinc cluster protein; deletion confers sensitivity to Calcufluor white, and prevents growth on glycerol or lactate as sole carbon source	296.838	1.20978	1.35209e-30	6
YCR073C	SSK22	protein_coding	III	MAP kinase kinase kinase of HOG1 mitogen-activated signaling pathway; functionally redundant with Ssk2p; interacts with and is activated by Ssk1p; phosphorylates Pbs2p; SSK22 has a paralog, SSK2, that arose from the whole genome duplication	596.796	1.20172	8.5679e-46	6
YER015W	FAA2	protein_coding	V	Medium chain fatty acyl-CoA synthetase; activates imported fatty acids; accepts a wide range of fatty acid chain lengths with a preference for medium chains, C9:0-C13:0; localized to the peroxisome; comparative analysis suggests that a mitochondrially targeted form may result from translation starting at a non-canonical codon upstream of the annotated start codon	164.803	1.19743	1.70262e-21	6
YGR097W	ASK10	protein_coding	VII	Regulator of the Fps1p glycerol channel; under nonstress conditions, binds to Fps1p to positively regulate glycerol transport; under osmotic stress, multiple phosphorylation by Hog1p causes Ask10p to dissociate from Fps1p; forms homodimers and heterodimerizes with paralog Rgc1p; phosphorylated in response to oxidative stress; has a role in destruction of Ssn8p; associates with RNA polymerase II h…	1763.83	1.19597	3.73079e-79	6
YBR085W	AAC3	protein_coding	II	Mitochondrial inner membrane ADP/ATP translocator; exchanges cytosolic ADP for mitochondrially synthesized ATP; expressed under anaerobic conditions; similar to Aac1p; has roles in maintenance of viability and in respiration; AAC3 has a paralog, PET9, that arose from the whole genome duplication	133.81	1.19329	1.74637e-13	6
YBR114W	RAD16	protein_coding	II	Nucleotide excision repair (NER) protein; binds damaged DNA during NER; binds DNA in an ATP-dependent manner (with Rad7p) during NER; required for NER of non-transcribed chromatin; subunit of Nucleotide Excision Repair Factor 4 (NEF4) and the Elongin-Cullin-Socs (ECS) ligase complex	439.13	1.1925	1.02817e-47	6
YOR220W	RCN2	protein_coding	XV	Protein of unknown function; green fluorescent protein (GFP)-fusion protein localizes to the cytoplasm; phosphorylated in response to alpha factor; protein abundance increases in response to DNA replication stress	196.406	1.1907	7.67139e-20	6
YGR295C	COS6	protein_coding	VII	Endosomal protein involved in turnover of plasma membrane proteins; member of the DUP380 subfamily of conserved, often subtelomeric COS genes; required for the multivesicular vesicle body sorting pathway that internalizes plasma membrane proteins for degradation; Cos proteins provide ubiquitin in trans for nonubiquitinated cargo proteins	1154.82	1.18579	7.30345e-42	6
YER046W	SPO73	protein_coding	V	Meiosis-specific protein required for prospore membrane morphogenesis; required for the proper shape of the prospore membrane (PSM) and for spore wall formation; functions cooperatively with SPO71 in PSM elongation; physically interacts with Spo71p; genetically antagonistic to SPO1, similar to SPO71; localizes to the PSM; required for spore wall formation during sporulation; dispensable for both …	83.0534	1.17728	1.14239e-09	6
YMR315W		protein_coding	XIII	Protein with NADP(H) oxidoreductase activity; transcription is regulated by Stb5p in response to NADPH depletion induced by diamide; promoter contains a putative Stb5p binding site; protein abundance increases in response to DNA replication stress	926.611	1.17546	1.63342e-86	6
YBL101C	ECM21	protein_coding	II	Protein involved in regulating endocytosis of plasma membrane proteins; identified as a substrate for ubiquitination by Rsp5p and deubiquitination by Ubp2p; promoter contains several Gcn4p binding elements; ECM21 has a paralog, CSR2, that arose from the whole genome duplication	905.76	1.17528	1.69151e-88	6
YER044C-A	MEI4	protein_coding	V	Meiosis-specific protein involved in forming DSBs; involved in double-strand break (DSBs) formation during meiotic recombination; required for chromosome synapsis and production of viable spores	51.5985	1.17014	3.4078e-07	6
YPL189C-A	COA2	protein_coding	XVI	Cytochrome oxidase assembly factor; null mutation results in respiratory deficiency with specific loss of cytochrome oxidase activity; functions downstream of assembly factors Mss51p and Coa1p and interacts with assembly factor Shy1p	176.141	1.16772	3.67576e-15	6
YIL065C	FIS1	protein_coding	IX	Protein involved in mitochondrial fission and peroxisome abundance; may have a distinct role in tethering protein aggregates to mitochondria in order to retain them in the mother cell; required for localization of Dnm1p and Mdv1p during mitochondrial division; mediates ethanol-induced apoptosis and ethanol-induced mitochondrial fragmentation	178.458	1.16109	1.8073e-16	6
YML118W	NGL3	protein_coding	XIII	3'-5' exonuclease specific for poly-A RNAs; has a domain similar to a magnesium-dependent endonuclease motif in mRNA deadenylase Ccr4p; similar to Ngl1p; NGL3 has a paralog, NGL2, that arose from the whole genome duplication	69.6626	1.15991	6.60357e-09	6
YOR228C	MCP1	protein_coding	XV	Mitochondrial protein of unknown function involved in lipid homeostasis; integral membrane protein that localizes to the mitochondrial outer membrane; involved in mitochondrial morphology; interacts genetically with MDM10, and other members of the ERMES complex; contains five predicted transmembrane domains	237.842	1.15458	5.64316e-22	6
YLR151C	PCD1	protein_coding	XII	8-oxo-dGTP diphosphatase; prevents spontaneous mutagenesis via sanitization of oxidized purine nucleoside triphosphates; can also act as peroxisomal pyrophosphatase with specificity for coenzyme A and CoA derivatives, may function to remove potentially toxic oxidized CoA disulfide from peroxisomes to maintain the capacity for beta-oxidation of fatty acids; nudix hydrolase family member; similar E…	64.8185	1.15143	2.41199e-08	6
YAL039C	CYC3	protein_coding	I	Cytochrome c heme lyase (holocytochrome c synthase); attaches heme to apo-cytochrome c (Cyc1p or Cyc7p) in mitochondrial intermembrane space; human homolog HCCS implicated in microphthalmia with linear skin defects (MLS), and can complement yeast null mutant	429.659	1.15032	1.98618e-39	6
YOL159C	CSS3	protein_coding	XV	Protein of unknown function, secreted when constitutively expressed; SWAT-GFP, seamless-GFP and mCherry fusion proteins localize to the cell periphery, SWAT-GFP fusion also localizes to the extracellular region, and mCherry fusion also localizes to the vacuole; deletion mutants are viable and have elevated levels of Ty1 retrotransposition and Ty1 cDNA	138.567	1.14978	3.4684e-17	6
YPL264C		protein_coding	XVI	Putative membrane protein of unknown function; physically interacts with Hsp82p; YPL264C is not an essential gene	80.6184	1.14711	1.45786e-11	6
YDR345C	HXT3	protein_coding	IV	Low affinity glucose transporter of the major facilitator superfamily; expression is induced in low or high glucose conditions; HXT3 has a paralog, HXT5, that arose from the whole genome duplication	9256.84	1.14663	1.42071e-43	6
YGR282C	BGL2	protein_coding	VII	Endo-beta-1,3-glucanase; major protein of the cell wall, involved in cell wall maintenance; involved in incorporation of newly synthesized mannoprotein molecules into the cell wall	8602.36	1.14609	1.71898e-26	6
YKL141W	SDH3	protein_coding	XI	Subunit of succinate dehydrogenase and of TIM22 translocase; functions as cytochrome b subunit of succinate dehydrogenase, which couples oxidation of succinate to transfer of electrons to ubiquinone as part of the TCA cycle and the mitochondrial respiratory chain; also required for mitochondrial inner membrane protein import as part of the TIM22 complex; SDH3 has a paralog, SHH3, that arose from …	1090.58	1.14586	3.40921e-56	6
YER037W	PHM8	protein_coding	V	Lysophosphatidic acid (LPA) phosphatase, nucleotidase; principle and physiological nucleotidase working on GMP, UMP and CMP; involved in LPA hydrolysis in response to phosphate starvation and ribose salvage pathway; phosphatase activity is soluble and Mg2+ dependent; expression is induced by low phosphate levels and by inactivation of Pho85p; repressed by Gcn4p under normal conditions; PHM8 has a…	418.607	1.14419	6.10343e-53	6
YMR145C	NDE1	protein_coding	XIII	Mitochondrial external NADH dehydrogenase; type II NAD(P)H:quinone oxidoreductase that catalyzes the oxidation of cytosolic NADH; Nde1p and Nde2p provide cytosolic NADH to the mitochondrial respiratory chain; NDE1 has a paralog, NDE2, that arose from the whole genome duplication	7333.1	1.14419	6.40675e-40	6
YOR208W	PTP2	protein_coding	XV	Nuclear phosphotyrosine-specific phosphatase involved in osmosensing; involved in the inactivation of mitogen-activated protein kinase (MAPK) during osmolarity sensing; dephosporylates Hog1p MAPK and regulates its localization; with Msg5p co-regulates the calcium signaling pathway	624.664	1.14349	1.69205e-32	6
YIL123W	SIM1	protein_coding	IX	Protein of the SUN family (Sim1p, Uth1p, Nca3p, Sun4p); may participate in DNA replication; promoter contains SCB regulation box at -300 bp indicating that expression may be cell cycle-regulated; SIM1 has a paralog, SUN4, that arose from the whole genome duplication	3467.65	1.14108	1.7777e-65	6
YDL194W	SNF3	protein_coding	IV	Plasma membrane low glucose sensor, regulates glucose transport; high affinity sensor that contains 12 predicted transmembrane segments and a long C-terminal tail required for induction of hexose transporters; also senses fructose and mannose; SNF3 has a paralog, RGT2, that arose from the whole genome duplication	350.48	1.14042	8.53443e-32	6
YLL041C	SDH2	protein_coding	XII	Iron-sulfur protein subunit of succinate dehydrogenase; the complex couples the oxidation of succinate to the transfer of electrons to ubiquinone as part of the TCA cycle and the mitochondrial respiratory chain; other members are Sdh1p, Sdh3p, and Sdh4p	853.052	1.13846	5.46821e-62	6
YER033C	ZRG8	protein_coding	V	Protein of unknown function; authentic, non-tagged protein is detected in highly purified mitochondria in high-throughput studies; GFP-fusion protein is localized to the cytoplasm; transcription induced under conditions of zinc deficiency	445.229	1.1376	9.13633e-29	6
YOR385W		protein_coding	XV	Putative protein of unknown function; green fluorescent protein (GFP)-fusion protein localizes to the cytoplasm; YOR385W is not an essential gene	236.728	1.13705	1.29952e-15	5
YNL104C	LEU4	protein_coding	XIV	Alpha-isopropylmalate synthase (2-isopropylmalate synthase); the main isozyme responsible for the first step in the leucine biosynthesis pathway; LEU4 has a paralog, LEU9, that arose from the whole genome duplication	9540.35	1.13653	1.19769e-51	6
YBR005W	RCR1	protein_coding	II	Protein of the ER membrane involved in cell wall chitin deposition; may function in the endosomal-vacuolar trafficking pathway, helping determine whether plasma membrane proteins are degraded or routed to the plasma membrane; RCR1 has a paralog, RCR2, that arose from the whole genome duplication	196.791	1.1351	1.22007e-20	6
YJL155C	FBP26	protein_coding	X	Fructose-2,6-bisphosphatase, required for glucose metabolism; protein abundance increases in response to DNA replication stress	295.108	1.13476	2.14848e-19	6
YMR272C	SCS7	protein_coding	XIII	Sphingolipid alpha-hydroxylase; functions in the alpha-hydroxylation of sphingolipid-associated very long chain fatty acids, has both cytochrome b5-like and hydroxylase/desaturase domains, not essential for growth	2420.86	1.1338	1.56424e-58	6
YDR410C	STE14	protein_coding	IV	Farnesyl cysteine-carboxyl methyltransferase; mediates the carboxyl methylation step during C-terminal CAAX motif processing of a-factor and RAS proteins in the endoplasmic reticulum, localizes to the ER membrane	281.252	1.13309	7.99946e-23	6
YGL186C	TPN1	protein_coding	VII	Plasma membrane pyridoxine (vitamin B6) transporter; member of the purine-cytosine permease subfamily within the major facilitator superfamily; proton symporter with similarity to Fcy21p, Fcy2p, and Fcy22p	1219.37	1.13287	9.30952e-36	6
Q0050	AI1	protein_coding	Mito	Reverse transcriptase required for splicing of the COX1 pre-mRNA; encoded by a mobile group II intron within the mitochondrial COX1 gene	20947	1.13163	3.80342e-66	6
YLR270W	DCS1	protein_coding	XII	Non-essential hydrolase involved in mRNA decapping; activates Xrn1p; may function in a feedback mechanism to regulate deadenylation, contains pyrophosphatase activity and a HIT (histidine triad) motif; acts as inhibitor of neutral trehalase Nth1p; required for growth on glycerol medium; protein abundance increases in response to DNA replication stress; DCS1 has a paralog, DCS2, that arose from th…	405.591	1.13084	1.59921e-33	6
YHR104W	GRE3	protein_coding	VIII	Aldose reductase; involved in methylglyoxal, d-xylose, arabinose, and galactose metabolism; stress induced (osmotic, ionic, oxidative, heat shock, starvation and heavy metals); regulated by the HOG pathway; protein abundance increases in response to DNA replication stress	683.514	1.12733	3.42758e-45	6
YNL173C	MDG1	protein_coding	XIV	Plasma membrane protein; involved in G-protein mediated pheromone signaling pathway; overproduction suppresses bem1 mutations; MDG1 has a paralog, CRP1, that arose from the whole genome duplication	469.677	1.12427	2.62667e-23	6
YGL062W	PYC1	protein_coding	VII	Pyruvate carboxylase isoform; cytoplasmic enzyme that converts pyruvate to oxaloacetate; differentially regulated than isoform Pyc2p; mutations in the human homolog are associated with lactic acidosis; PYC1 has a paralog, PYC2, that arose from the whole genome duplication	2750.12	1.12111	2.90089e-50	6
YAR031W	PRM9	protein_coding	I	Pheromone-regulated protein; contains 3 predicted transmembrane segments and an FF sequence, a motif involved in COPII binding; member of DUP240 gene family; PRM9 has a paralog, PRM8, that arose from a segmental duplication	74.5923	1.10958	8.4801e-10	6
YOL030W	GAS5	protein_coding	XV	1,3-beta-glucanosyltransferase; has similarity to Gas1p; localizes to the cell wall	4226.8	1.10758	3.05427e-90	6
YJL103C	GSM1	protein_coding	X	Putative zinc cluster protein of unknown function; proposed to be involved in the regulation of energy metabolism, based on patterns of expression and sequence analysis	175.499	1.10465	1.36506e-17	6
YGL162W	SUT1	protein_coding	VII	Zn(II)2Cys6 family transcription factor; positively regulates sterol uptake genes under anaerobic conditions; involved in hypoxic gene expression; represses filamentation-inducing genes during vegetative growth; positively regulates mating with SUT2 by repressing expression of genes that act as mating inhibitors; repressed by STE12; relocalizes from the nucleus to the cytoplasm upon DNA replicati…	200.25	1.10268	2.8743e-20	6
YGL006W	PMC1	protein_coding	VII	Vacuolar Ca2+ ATPase involved in depleting cytosol of Ca2+ ions; prevents growth inhibition by activation of calcineurin in the presence of elevated concentrations of calcium; similar to mammalian PMCA1a	1239.11	1.10264	2.48955e-74	6
YOR137C	SIA1	protein_coding	XV	Protein of unassigned function; involved in activation of the Pma1p plasma membrane H+-ATPase by glucose; contains peptide signal for membrane localization	371.745	1.09938	1.65833e-34	6
YJL157C	FAR1	protein_coding	X	CDK inhibitor and nuclear anchor; during the cell cycle Far1p sequesters the GEF Cdc24p in the nucleus; phosphorylation by Cdc28p-Cln results in SCFCdc4 complex-mediated ubiquitin-dependent degradation, releasing Cdc24p for export and activation of GTPase Cdc42p; in response to pheromone, phosphorylation of Far1p by MAPK Fus3p results in association with, and inhibition of Cdc28p-Cln, as well as …	1130.14	1.08791	1.76259e-26	5
YGR131W	FHN1	protein_coding	VII	Protein of unknown function; induced by ketoconazole; promoter region contains sterol regulatory element motif, which has been identified as a Upc2p-binding site; overexpression complements function of Nce102p in NCE102 deletion strain; FHN1 has a paralog, NCE102, that arose from the whole genome duplication	64.3046	1.08677	5.84205e-10	6
YGR161W-C		protein_coding	VII	Putative protein of unknown function; identified by sequence comparison with hemiascomycetous yeast species	149.029	1.08661	4.3324e-15	6
YDR379C-A	SDH6	protein_coding	IV	Mitochondrial protein involved in assembly of succinate dehydrogenase; has a role in maturation of the Sdh2p subunit; member of the LYR protein family; mutations in human ortholog SDHAF1 are associated with infantile leukoencephalopathy	61.3824	1.08616	1.01044e-07	6
Q0055	AI2	protein_coding	Mito	Reverse transcriptase required for splicing of the COX1 pre-mRNA; encoded by a mobile group II intron within the mitochondrial COX1 gene	10455.6	1.08596	1.25083e-63	6
YBR115C	LYS2	protein_coding	II	Alpha aminoadipate reductase; catalyzes the reduction of alpha-aminoadipate to alpha-aminoadipate 6-semialdehyde, which is the fifth step in biosynthesis of lysine; activation requires posttranslational phosphopantetheinylation by Lys5p	3145.09	1.085	1.66746e-66	5
YDR525W-A	SNA2	protein_coding	IV	Protein of unknown function; has similarity to Pmp3p, which is involved in cation transport; green fluorescent protein (GFP)-fusion protein localizes to the cytoplasm in a punctate pattern	225.006	1.08144	2.70307e-12	6
YER095W	RAD51	protein_coding	V	Strand exchange protein; forms a helical filament with DNA that searches for homology; involved in the recombinational repair of double-strand breaks in DNA during vegetative growth and meiosis; homolog of Dmc1p and bacterial RecA protein	1071.96	1.08041	8.41543e-42	6
YIR017C	MET28	protein_coding	IX	bZIP transcriptional activator in the Cbf1p-Met4p-Met28p complex; participates in the regulation of sulfur metabolism	82.3239	1.07953	4.99849e-10	5
YDR247W	VHS1	protein_coding	IV	Cytoplasmic serine/threonine protein kinase; identified as a high-copy suppressor of the synthetic lethality of a sis2 sit4 double mutant, suggesting a role in G1/S phase progression; VHS1 has a paralog, SKS1, that arose from the whole genome duplication	338.333	1.07661	1.41678e-27	6
YBR238C		protein_coding	II	Mitochondrial membrane protein; not required for respiratory growth but causes a synthetic respiratory defect in combination with rmd9 mutations; transcriptionally up-regulated by TOR; deletion increases life span; YBR238C has a paralog, RMD9, that arose from the whole genome duplication	1432.44	1.07078	2.70648e-70	6
YNL012W	SPO1	protein_coding	XIV	Meiosis-specific prospore protein; required for meiotic spindle pole body duplication and separation; required to produce bending force necessary for proper prospore membrane assembly during sporulation; has similarity to phospholipase B	53.8058	1.06915	1.32716e-07	6
YDR111C	ALT2	protein_coding	IV	Catalytically inactive alanine transaminase; expression is repressed in the presence of alanine and repression is mediated by Nrg1p; ALT2 has a paralog, ALT1, that arose from the whole genome duplication	398.775	1.06817	7.83027e-17	6
YNL037C	IDH1	protein_coding	XIV	Subunit of mitochondrial NAD(+)-dependent isocitrate dehydrogenase; complex catalyzes the oxidation of isocitrate to alpha-ketoglutarate in the TCA cycle	1047.71	1.06773	1.04706e-39	6
YPR036W-A	SPO24	protein_coding	XVI	Small (67 amino acids) protein involved in sporulation; localizes to the prospore membrane; phosphorylated during meiosis; a longer, 5'-extended mRNA is also transcribed beginning in mid-meiosis, regulated by two MSEs (middle sporulation elements), and includes an uORF of 15 codons in its 5'-UTR; evidence transcription is regulated by Pdr1p	2112.85	1.06686	2.36254e-31	6
YAL053W	FLC2	protein_coding	I	Putative calcium channel involved in calcium release under hypotonic stress; required for uptake of FAD into endoplasmic reticulum; involved in cell wall maintenance; FLC2 has a paralog, YOR365C, that arose from the whole genome duplication	3033.51	1.06467	8.38566e-68	6
YJR115W		protein_coding	X	Putative protein of unknown function; YJR115W has a paralog, ECM13, that arose from the whole genome duplication	64.7256	1.06298	8.87e-08	6
YOR044W	IRC23	protein_coding	XV	Protein of unknown function; green fluorescent protein (GFP)-fusion localizes to the ER; null mutant displays increased levels of spontaneous Rad52p foci; IRC23 has a paralog, BSC2, that arose from the whole genome duplication	143.27	1.06274	7.38488e-15	6
YLR205C	HMX1	protein_coding	XII	ER localized heme oxygenase; involved in heme degradation during iron starvation and in the oxidative stress response; expression is regulated by AFT1 and oxidative stress; relocates to the perinuclear region in the presence of oxidants	193.523	1.06152	4.47952e-17	6
YEL066W	HPA3	protein_coding	V	D-Amino acid N-acetyltransferase that detoxifies D-amino acids; catalyzes N-acetylation of D-amino acids through ordered bi-bi mechanism in which acetyl-CoA is first substrate bound and CoA is last product liberated; acetylates histones and polyamines, also autoacetylates	183.971	1.05907	3.5683e-14	6
YBR208C	DUR1,2	protein_coding	II	Urea amidolyase; contains both urea carboxylase and allophanate hydrolase activities, degrades urea to CO2 and NH3; expression sensitive to nitrogen catabolite repression and induced by allophanate, an intermediate in allantoin degradation; protein abundance increases in response to DNA replication stress	2410.88	1.05777	1.15391e-41	5
YDR011W	SNQ2	protein_coding	IV	Plasma membrane ATP-binding cassette (ABC) transporter; multidrug transporter involved in multidrug resistance and resistance to singlet oxygen species	5814.14	1.05046	1.15268e-48	6
YMR164C	MSS11	protein_coding	XIII	Transcription factor; involved in regulation of invasive growth and starch degradation; controls the activation of FLO11 and STA2 in response to nutritional signals; forms a heterodimer with Flo8p that interacts with the Swi/Snf complex during transcriptional activation of FLO1, FLO11, and STA1	240.674	1.05043	5.46324e-20	6
YBL015W	ACH1	protein_coding	II	Protein with CoA transferase activity; particularly for CoASH transfer from succinyl-CoA to acetate; has minor acetyl-CoA-hydrolase activity; phosphorylated; required for acetate utilization and for diploid pseudohyphal growth	603.207	1.04971	3.45304e-21	6
YNL234W		protein_coding	XIV	Protein of unknown function with similarity to globins; has a functional heme-binding domain; mutant has aneuploidy tolerance; transcription induced by stress conditions; may be involved in glucose signaling or metabolism; regulated by Rgt1	158.376	1.04707	2.9875e-14	6
YDR249C		protein_coding	IV	Putative protein of unknown function	193.126	1.04706	2.54227e-18	6
YCL012C	YCL012C	protein_coding	III	Protein of unknown function; SWAT-GFP and mCherry fusion proteins localize to the endoplasmic reticulum and vacuole respectively; orthologs are present in S. bayanus, S. paradoxus and Ashbya gossypii; YCL012C is not an essential gene	116.271	1.04123	2.55727e-11	6
YLR213C	CRR1	protein_coding	XII	Putative glycoside hydrolase of the spore wall envelope; required for normal spore wall assembly, possibly for cross-linking between the glucan and chitosan layers; expressed during sporulation	50.6444	1.041	5.09632e-06	6
YLR446W		protein_coding	XII	Putative hexokinase; transcript is upregulated during sporulation and the unfolded protein response; YLR446W is not an essential gene	134.171	1.03684	6.92693e-12	6
YBR066C	NRG2	protein_coding	II	Transcriptional repressor; mediates glucose repression and negatively regulates filamentous growth; activated in stochastic pulses of nuclear localization in response to low glucose	122.906	1.032	3.98153e-11	6
YDR261C	EXG2	protein_coding	IV	Exo-1,3-beta-glucanase; involved in cell wall beta-glucan assembly; may be anchored to the plasma membrane via a glycosylphosphatidylinositol (GPI) anchor	1309.58	1.03124	2.30357e-77	6
YGR019W	UGA1	protein_coding	VII	Gamma-aminobutyrate (GABA) transaminase; also known as 4-aminobutyrate aminotransferase; involved in the 4-aminobutyrate and glutamate degradation pathways; required for normal oxidative stress tolerance and nitrogen utilization; protein abundance increases in response to DNA replication stress	404.685	1.02239	1.82883e-28	6
YGR153W	YGR153W	protein_coding	VII	Putative protein of unknown function	75.0616	1.01959	3.91758e-06	6
YEL059C-A	SOM1	protein_coding	V	Subunit of the mitochondrial inner membrane peptidase (IMP); IMP is required for maturation of mitochondrial proteins of the intermembrane space; Som1p facilitates cleavage of a subset of substrates; contains twin cysteine-x9-cysteine motifs	111.33	1.0184	5.50325e-10	6
YPR196W		protein_coding	XVI	Putative maltose-responsive transcription factor	182.577	1.01595	3.33427e-16	6
YPL003W	ULA1	protein_coding	XVI	Protein that activates Rub1p (NEDD8) before neddylation; acts together with Uba3p; may play a role in protein degradation	202.758	1.01385	3.78733e-15	6
YOR202W	HIS3	protein_coding	XV	Imidazoleglycerol-phosphate dehydratase; catalyzes the sixth step in histidine biosynthesis; mutations cause histidine auxotrophy and sensitivity to Cu, Co, and Ni salts; transcription is regulated by general amino acid control via Gcn4p	82.8371	1.01368	9.30658e-10	6
YBL030C	PET9	protein_coding	II	Major ADP/ATP carrier of the mitochondrial inner membrane; exchanges cytosolic ADP for mitochondrially synthesized ATP; also imports heme and ATP; required for viability in many lab strains that carry a sal1 mutation; PET9 has a paralog, AAC3, that arose from the whole genome duplication; human homolog SLC25A4 implicated in progressive external ophthalmoplegia can complement yeast null mutant	7193.7	1.01125	7.52484e-43	6
YLR109W	AHP1	protein_coding	XII	Thiol-specific peroxiredoxin; reduces hydroperoxides to protect against oxidative damage; function in vivo requires covalent conjugation to Urm1p	5575.35	1.0093	2.00579e-26	6
YPL014W	CIP1	protein_coding	XVI	Cyclin-dependent kinase inhibitor; interacts with and inhibits the Cdc28p/Cln2p, G1/S phase cyclin-dependent kinase complex but not S-phase, or M-phase complexes; overexpression blocks cells in G1 phase and stabilizes the Cdc28p inhibitor Sic1p, while disruption accelerates the G1/S phase transition; phosphorylated during S phase in a Cdc28p-dependent manner; green fluorescent protein (GFP)-fusio…	153.966	1.00786	3.83771e-10	6
YML116W	ATR1	protein_coding	XIII	Multidrug efflux pump of the major facilitator superfamily; required for resistance to aminotriazole and 4-nitroquinoline-N-oxide; ATR1 has a paralog, YMR279C, that arose from the whole genome duplication; protein abundance increases in response to DNA replication stress	492.617	1.00673	2.54958e-15	6
YKL121W	DGR2	protein_coding	XI	Protein of unknown function; null mutant is resistant to 2-deoxy-D-glucose and displays abnormally elongated buds; DGR2 has a paralog, YMR102C, that arose from the whole genome duplication	214.136	1.00527	1.66676e-18	6
YOL147C	PEX11	protein_coding	XV	Peroxisomal protein required for medium-chain fatty acid oxidation; also required for peroxisome proliferation, possibly by inducing membrane curvature; localization regulated by phosphorylation; transcription regulated by Adr1p and Pip2p-Oaf1p	500.194	1.00468	1.65052e-31	6
YMR053C	STB2	protein_coding	XIII	Protein that interacts with Sin3p in a two-hybrid assay; part of a large protein complex with Sin3p and Stb1p; STB2 has a paralog, STB6, that arose from the whole genome duplication	171.638	1.00059	1.80505e-13	6
YBR149W	ARA1	protein_coding	II	NADP+ dependent arabinose dehydrogenase; involved in carbohydrate metabolism; purified as homodimer; naturally occurs with a N-terminus degradation product	961.967	1.00055	3.49399e-41	6
YBR009C	HHF1	protein_coding	II	Histone H4; core histone protein required for chromatin assembly and chromosome function; one of two identical histone proteins (see also HHF2); contributes to telomeric silencing; N-terminal domain involved in maintaining genomic integrity	1682.76	-1.01457	4.03327e-35	8
YLR228C	ECM22	protein_coding	XII	Sterol regulatory element binding protein; regulates transcription of sterol biosynthetic genes upon sterol depletion, after relocating from intracellular membranes to perinuclear foci; redundant activator of filamentation with UPC2, up-regulating the expression of genes involved in filamentous growth; contains Zn[2]-Cys[6] binuclear cluster; ECM22 has a paralog, UPC2, that arose from the whole g…	355.528	-1.01791	7.42143e-26	8
YER146W	LSM5	protein_coding	V	Lsm (Like Sm) protein; part of heteroheptameric complexes (Lsm2p-7p and either Lsm1p or 8p): cytoplasmic Lsm1p complex involved in mRNA decay; nuclear Lsm8p complex part of U6 snRNP and possibly involved in processing tRNA, snoRNA, and rRNA	169.074	-1.0295	6.09004e-16	8
YGL101W		protein_coding	VII	Protein of unknown function; non-essential gene; interacts with the DNA helicase Hpr5p; YGL101W has a paralog, YBR242W, that arose from the whole genome duplication	193.806	-1.03161	3.5683e-14	8
YIR036C	IRC24	protein_coding	IX	Putative benzil reductase;(GFP)-fusion protein localizes to the cytoplasm and is induced by the DNA-damaging agent MMS; sequence similarity with short-chain dehydrogenase/reductases; null mutant has increased spontaneous Rad52p foci	200.512	-1.04876	1.61278e-15	8
YNL142W	MEP2	protein_coding	XIV	Ammonium permease involved in regulation of pseudohyphal growth; belongs to a ubiquitous family of cytoplasmic membrane proteins that transport only ammonium (NH4+); expression is under the nitrogen catabolite repression regulation	647.896	-1.08716	8.36677e-31	8
YGR212W	SLI1	protein_coding	VII	N-acetyltransferase; confers resistance to the sphingolipid biosynthesis inhibitor myriocin (ISP-1) by converting it into N-acetyl-myriocin, co-operates with Ypk1p in mediating resistance to myriocin	86.2845	-1.14287	9.74822e-10	8
YHL050C		protein_coding	VIII	Putative protein of unknown function; potential Cdc28p substrate	132.049	-1.17024	1.02021e-12	8
YOR315W	SFG1	protein_coding	XV	Nuclear protein putative transcription factor; required for growth of superficial pseudohyphae (which do not invade the agar substrate) but not for invasive pseudohyphal growth; may act together with Phd1p; potential Cdc28p substrate	510.568	-1.20161	3.08841e-44	8
YHR120W	MSH1	protein_coding	VIII	DNA-binding protein of the mitochondria; involved in repair of mitochondrial DNA; has ATPase activity and binds to DNA mismatches; has homology to E. coli MutS; transcription is induced during meiosis	270.208	-1.2741	1.77333e-32	8
YDR073W	SNF11	protein_coding	IV	Subunit of the SWI/SNF chromatin remodeling complex; involved in transcriptional regulation; interacts with a highly conserved 40-residue sequence of Snf2p; relocates to the cytosol under hypoxic conditions	197.58	-1.35514	1.0344e-21	8
YPR194C	OPT2	protein_coding	XVI	Oligopeptide transporter; localized to peroxisomes and affects glutathione redox homeostasis; also localizes to the plasma membrane (PM) and to the late Golgi, and has a role in maintenance of lipid asymmetry between the inner and outer leaflets of the PM; member of the OPT family, with potential orthologs in S. pombe and C. albicans; also plays a role in formation of mature vacuoles and in polar…	344.094	-1.58329	1.61424e-36	8
YDR281C	PHM6	protein_coding	IV	Protein of unknown function; expression is regulated by phosphate levels	106.391	-1.60111	8.2964e-27	8
YEL040W	UTR2	protein_coding	V	Chitin transglycosylase; functions in the transfer of chitin to beta(1-6) and beta(1-3) glucans in the cell wall; similar to and functionally redundant with Crh1; glycosylphosphatidylinositol (GPI)-anchored protein localized to bud neck	5966.46	-1.67763	3.89935e-126	8
YDR502C	SAM2	protein_coding	IV	S-adenosylmethionine synthetase; catalyzes transfer of the adenosyl group of ATP to the sulfur atom of methionine; comparative analysis suggests that a mitochondrially targeted form may result from translation starting at a non-canonical codon upstream of the annotated start codon	2358.67	-1.69192	2.58195e-172	8
YPL265W	DIP5	protein_coding	XVI	Dicarboxylic amino acid permease; mediates high-affinity and high-capacity transport of L-glutamate and L-aspartate; also a transporter for Gln, Asn, Ser, Ala, and Gly; relocalizes from plasma membrane to vacuole upon DNA replication stress	1288.92	-3.56665	0	8

## Sheet: WT_alpha vs. WT_a
WT a vs. WT a Comparison
Genes with >2-fold change; protein coding only
id	gene_name	biotype	chromosome	description	baseMean	log2FoldChange	padj	Cluster
YPL187W	MF(ALPHA)1	protein_coding	XVI	Mating pheromone alpha-factor, made by alpha cells; interacts with mating type a cells to induce cell cycle arrest and other responses leading to mating; also encoded by MF(ALPHA)2, although MF(ALPHA)1 produces most alpha-factor; binds copper(II) ions	1964.79	10.0392	3.13963e-35	3
YGL089C	MF(ALPHA)2	protein_coding	VII	Mating pheromone alpha-factor, made by alpha cells; interacts with mating type a cells to induce cell cycle arrest and other responses leading to mating; also encoded by MF(ALPHA)1, which is more highly expressed; binds copper(II) ions	2440.32	9.3523	3.26427e-103	3
YKL178C	STE3	protein_coding	XI	Receptor for a factor pheromone; couples to MAP kinase cascade to mediate pheromone response; transcribed in alpha cells and required for mating by alpha cells, ligand bound receptors endocytosed and recycled to the plasma membrane; GPCR	1270.18	7.78676	1.9856e-229	3
YLR040C	AFB1	protein_coding	XII	MATalpha-specific a-factor blocker; contributes to mating efficiency under certain conditions; localizes to the cell wall; predicted to be a GPI-attached protein; upregulated by Mcm1p-Alpha1p transcription factor; partially overlaps the dubious ORF YLR041W	1027.35	4.34722	0	5
YJR004C	SAG1	protein_coding	X	Alpha-agglutinin of alpha-cells; binds to Aga1p during agglutination, N-terminal half is homologous to the immunoglobulin superfamily and contains binding site for a-agglutinin, C-terminal half is highly glycosylated and contains GPI anchor	6171.46	3.88655	1.20408e-272	4
YDL037C	BSC1	protein_coding	IV	Protein of unconfirmed function; similar to cell surface flocculin Flo11p; ORF exhibits genomic organization compatible with a translational readthrough-dependent mode of expression; in W303 strain one continuous open reading frame comprising of YDL037C, the intergenic region and YDL039C encodes the gene IMI1	323.285	1.44501	1.41054e-10	1
YDL039C	PRM7	protein_coding	IV	Pheromone-regulated protein; predicted to have one transmembrane segment; promoter contains Gcn4p binding elements; in W303 strain one continuous open reading frame comprising of YDL037C, the intergenic region and YDL039C encodes the IMI1	464.422	1.18082	1.00046e-05	1
YGL032C	AGA2	protein_coding	VII	Adhesion subunit of a-agglutinin of a-cells; C-terminal sequence acts as a ligand for alpha-agglutinin (Sag1p) during agglutination, modified with O-linked oligomannosyl chains, linked to anchorage subunit Aga1p via two disulfide bonds	356.71	-4.88733	3.16975e-25	7
YKL209C	STE6	protein_coding	XI	Plasma membrane ATP-binding cassette (ABC) transporter; required for the export of a-factor, catalyzes ATP hydrolysis coupled to a-factor transport; contains 12 transmembrane domains and two ATP binding domains; expressed only in MATa cells; human homolog ABCB1 mediates multidrug resistance in many chemotherapy-resistant tumors by effluxing toxic compounds from the cell	2309.84	-4.99643	0	7
YDR461W	MFA1	protein_coding	IV	Mating pheromone a-factor; made by a cells; interacts with alpha cells to induce cell cycle arrest and other responses leading to mating; biogenesis involves C-terminal modification, N-terminal proteolysis, and export; also encoded by MFA2	222.497	-5.46588	8.68637e-20	7
YIL015W	BAR1	protein_coding	IX	Aspartyl protease; secreted into the periplasmic space of mating type a cell; helps cells find mating partners; cleaves and inactivates alpha factor allowing cells to recover from alpha-factor-induced cell cycle arrest	1358.81	-6.2179	5.28476e-245	7
YFL026W	STE2	protein_coding	VI	Receptor for alpha-factor pheromone; seven transmembrane-domain GPCR that interacts with both pheromone and a heterotrimeric G protein to initiate the signaling response that leads to mating between haploid a and alpha cells	3092.9	-6.50777	0	7
YNL145W	MFA2	protein_coding	XIV	Mating pheromone a-factor; made by a cells; interacts with alpha cells to induce cell cycle arrest and other responses leading to mating; biogenesis involves C-terminal modification, N-terminal proteolysis, and export; also encoded by MFA1	2422.23	-7.40497	1.01102e-116	7

## Sheet: S649F_alpha vs. S649F_a
tup1(S649F) a vs. tup1(S649F) a Comparison
Genes with >2-fold change; protein coding only
id	gene_name	biotype	chromosome	description	baseMean	log2FoldChange	padj	Cluster
YGL089C	MF(ALPHA)2	protein_coding	VII	Mating pheromone alpha-factor, made by alpha cells; interacts with mating type a cells to induce cell cycle arrest and other responses leading to mating; also encoded by MF(ALPHA)1, which is more highly expressed; binds copper(II) ions	2440.32	10.826	4.33697e-80	3
YPL187W	MF(ALPHA)1	protein_coding	XVI	Mating pheromone alpha-factor, made by alpha cells; interacts with mating type a cells to induce cell cycle arrest and other responses leading to mating; also encoded by MF(ALPHA)2, although MF(ALPHA)1 produces most alpha-factor; binds copper(II) ions	1964.79	9.66972	4.35473e-99	3
YKL178C	STE3	protein_coding	XI	Receptor for a factor pheromone; couples to MAP kinase cascade to mediate pheromone response; transcribed in alpha cells and required for mating by alpha cells, ligand bound receptors endocytosed and recycled to the plasma membrane; GPCR	1270.18	9.01033	3.2636e-180	3
YBR040W	FIG1	protein_coding	II	Integral membrane protein required for efficient mating; may participate in or regulate the low affinity Ca2+ influx system, which affects intracellular signaling and cell-cell fusion during mating	187.297	8.24555	3.19156e-45	4
YNL279W	PRM1	protein_coding	XIV	Pheromone-regulated multispanning membrane protein; involved in membrane fusion during mating; predicted to have 5 transmembrane segments and a coiled coil domain; localizes to the shmoo tip; regulated by Ste12p	434.234	7.07619	2.62636e-194	4
YJR004C	SAG1	protein_coding	X	Alpha-agglutinin of alpha-cells; binds to Aga1p during agglutination, N-terminal half is homologous to the immunoglobulin superfamily and contains binding site for a-agglutinin, C-terminal half is highly glycosylated and contains GPI anchor	6171.46	6.65919	0	4
YIL037C	PRM2	protein_coding	IX	Pheromone-regulated protein; predicted to have 4 transmembrane segments and a coiled coil domain; regulated by Ste12p; required for efficient nuclear fusion	74.0654	6.22742	1.06934e-49	5
YCR089W	FIG2	protein_coding	III	Cell wall adhesin, expressed specifically during mating; may be involved in maintenance of cell wall integrity during mating; FIG2 has a paralog, AGA1, that arose from the whole genome duplication	1434.61	5.37116	1.37337e-195	4
YCL027W	FUS1	protein_coding	III	Membrane protein localized to the shmoo tip; required for cell fusion; expression regulated by mating pheromone; proposed to coordinate signaling, fusion, and polarization events required for fusion; potential Cdc28p substrate	204.386	5.29761	5.83294e-86	5
YNR044W	AGA1	protein_coding	XIV	Anchorage subunit of a-agglutinin of a-cells; highly O-glycosylated protein with N-terminal secretion signal and C-terminal signal for addition of GPI anchor to cell wall, linked to adhesion subunit Aga2p via two disulfide bonds; AGA1 has a paralog, FIG2, that arose from the whole genome duplication	695.408	5.09666	2.07487e-155	4
YOL058W	ARG1	protein_coding	XV	Arginosuccinate synthetase; catalyzes the formation of L-argininosuccinate from citrulline and L-aspartate in the arginine biosynthesis pathway; potential Cdc28p substrate	513.444	4.38324	7.26439e-208	5
YLR040C	AFB1	protein_coding	XII	MATalpha-specific a-factor blocker; contributes to mating efficiency under certain conditions; localizes to the cell wall; predicted to be a GPI-attached protein; upregulated by Mcm1p-Alpha1p transcription factor; partially overlaps the dubious ORF YLR041W	1027.35	4.14301	0	5
YMR095C	SNO1	protein_coding	XIII	Protein of unconfirmed function; involved in pyridoxine metabolism; expression is induced during stationary phase; forms a putative glutamine amidotransferase complex with Snz1p, with Sno1p serving as the glutaminase	156.472	4.0271	2.20773e-90	5
YMR232W	FUS2	protein_coding	XIII	Cell fusion regulator; cytoplasmic protein localized to shmoo tip; required for alignment of parental nuclei before nuclear fusion during mating; contains a Dbl-homology domain; binds specifically with activated Cdc42p	98.0851	3.58411	1.8658e-62	5
YIL169C		protein_coding	IX	Protein of unknown function, secreted when constitutively expressed; SWAT-GFP, seamless-GFP and mCherry fusion proteins localize to the cell periphery, SWAT-GFP fusion also localizes to the extracellular region, and mCherry fusion also localizes to the vacuole; S/T rich and highly similar to YOL155C, a putative glucan alpha-1,4-glucosidase; transcript is induced in both high and low pH environmen…	61.7059	3.46669	3.73177e-43	5
YMR096W	SNZ1	protein_coding	XIII	Protein involved in vitamin B6 biosynthesis; member of a stationary phase-induced gene family; coregulated with SNO1; interacts with Sno1p and with Yhr198p, perhaps as a multiprotein complex containing other Snz and Sno proteins	1136.5	3.42168	3.37782e-188	5
YDR098C	GRX3	protein_coding	IV	Glutathione-dependent oxidoreductase; hydroperoxide and superoxide-radical responsive; monothiol glutaredoxin subfamily member along with Grx4p and Grx5p; protects cells from oxidative damage; with Grx4p, binds to Aft1p in iron-replete conditions, promoting its dissociation from promoters; evidence exists indicating that the translation start site is not Met1 as currently annotated, but rather Me…	755.681	3.17388	1.32909e-175	5
YCL055W	KAR4	protein_coding	III	Transcription factor required for response to pheromones; also required during meiosis; exists in two forms, a slower-migrating form more abundant during vegetative growth and a faster-migrating form induced by pheromone	152.145	2.91088	1.58778e-63	5
YDR124W		protein_coding	IV	Putative protein of unknown function; non-essential gene; expression is strongly induced by alpha factor	69.5627	2.69039	2.96908e-38	5
YGL053W	PRM8	protein_coding	VII	Pheromone-regulated protein; contains with 2 predicted transmembrane segments and an FF sequence, a motif involved in COPII binding; forms a complex with Prp9p in the ER; member of DUP240 gene family; PRM8 has a paralog, PRM9, that arose from a segmental duplication	138.778	2.65152	6.5447e-64	5
YGL032C	AGA2	protein_coding	VII	Adhesion subunit of a-agglutinin of a-cells; C-terminal sequence acts as a ligand for alpha-agglutinin (Sag1p) during agglutination, modified with O-linked oligomannosyl chains, linked to anchorage subunit Aga1p via two disulfide bonds	356.71	2.53003	3.66223e-71	7
YLR042C		protein_coding	XII	Cell wall protein of unknown function; localizes to the cytoplasm; deletion improves xylose fermentation in industrially engineered strains; YLR042C is not an essential gene	198.647	2.51521	7.89944e-60	5
YJR078W	BNA2	protein_coding	X	Tryptophan 2,3-dioxygenase or indoleamine 2,3-dioxygenase; required for de novo biosynthesis of NAD from tryptophan via kynurenine; interacts genetically with telomere capping gene CDC13; regulated by Hst1p and Aftp	98.4958	2.49449	2.40028e-39	5
YBR294W	SUL1	protein_coding	II	High affinity sulfate permease of the SulP anion transporter family; sulfate uptake is mediated by specific sulfate transporters Sul1p and Sul2p, which control the concentration of endogenous activated sulfate intermediates	52.6034	2.40607	1.98506e-19	5
YHR018C	ARG4	protein_coding	VIII	Argininosuccinate lyase; catalyzes the final step in the arginine biosynthesis pathway	1329.7	2.33647	1.06155e-202	5
YER185W	PUG1	protein_coding	V	Plasma membrane protein involved in protoprophyrin and heme transport; roles in the uptake of protoprophyrin IX and the efflux of heme; expression is induced under both low-heme and low-oxygen conditions; member of the fungal lipid-translocating exporter (LTE) family of proteins	52.8811	2.32584	1.90633e-35	5
YLR452C	SST2	protein_coding	XII	GTPase-activating protein for Gpa1p; regulates desensitization to alpha factor pheromone; also required to prevent receptor-independent signaling of the mating pathway; member of the RGS (regulator of G-protein signaling) family	1142.5	2.29295	1.47588e-89	5
YPL156C	PRM4	protein_coding	XVI	Pheromone-regulated protein proposed to be involved in mating; predicted to have 1 transmembrane segment; transcriptionally regulated by Ste12p during mating and by Cat8p during the diauxic shift	114.964	2.26025	8.70557e-47	5
YJL088W	ARG3	protein_coding	X	Ornithine carbamoyltransferase; also known as carbamoylphosphate:L-ornithine carbamoyltransferase; catalyzes the biosynthesis of the arginine precursor citrulline	129.574	2.25943	6.3442e-32	5
YCL030C	HIS4	protein_coding	III	Multifunctional enzyme containing phosphoribosyl-ATP pyrophosphatase; phosphoribosyl-AMP cyclohydrolase, and histidinol dehydrogenase activities; catalyzes the second, third, ninth and tenth steps in histidine biosynthesis	1115.97	2.24438	2.66603e-95	5
YIR028W	DAL4	protein_coding	IX	Allantoin permease; expression sensitive to nitrogen catabolite repression and induced by allophanate, an intermediate in allantoin degradation	145.952	2.18209	1.04694e-37	5
YKL218C	SRY1	protein_coding	XI	3-hydroxyaspartate dehydratase; deaminates L-threo-3-hydroxyaspartate to form oxaloacetate and ammonia; required in the presence of hydroxyaspartate; highly similar to mouse serine racemase (Srr) but has no serine racemase activity	146.273	2.16411	3.70141e-54	5
YER081W	SER3	protein_coding	V	3-phosphoglycerate dehydrogenase and alpha-ketoglutarate reductase; 3PG dehydrogenase that catalyzes the first step in serine and glycine biosynthesis; also functions as an alpha-ketoglutarate reductase, converting alpha-ketoglutarate to D-2-hydroxyglutarate (D-2HG); localizes to the cytoplasm; SER3 has a paralog, SER33, that arose from the whole genome duplication	438.877	2.16379	3.95603e-126	5
YGL194C-A		protein_coding	VII	Putative protein of unknown function; identified based on comparisons of the genome sequences of six Saccharomyces species; SWAT-GFP and mCherry fusion proteins localize to the endoplasmic reticulum	95.2674	2.16244	9.42339e-29	5
YJR109C	CPA2	protein_coding	X	Large subunit of carbamoyl phosphate synthetase; carbamoyl phosphate synthetase catalyzes a step in the synthesis of citrulline, an arginine precursor	2810.53	2.07774	7.88877e-168	5
YMR065W	KAR5	protein_coding	XIII	Protein required for nuclear membrane fusion during karyogamy; localizes to the membrane with a soluble portion in the endoplasmic reticulum lumen, may form a complex with Jem1p and Kar2p; similar to zebrafish Brambleberry protein; expression of the gene is regulated by pheromone	70.2151	2.04942	3.04408e-23	5
YER069W	ARG5,6	protein_coding	V	Acetylglutamate kinase and N-acetyl-gamma-glutamyl-phosphate reductase; N-acetyl-L-glutamate kinase (NAGK) catalyzes the 2nd and N-acetyl-gamma-glutamyl-phosphate reductase (NAGSA), the 3rd step in arginine biosynthesis; synthesized as a precursor which is processed in the mitochondrion to yield mature NAGK and NAGSA; enzymes form a metabolon complex with Arg2p; NAGK C-terminal domain stabilizes …	1311.36	1.98094	1.08163e-108	5
YAL067C	SEO1	protein_coding	I	Putative permease; member of the allantoate transporter subfamily of the major facilitator superfamily; mutation confers resistance to ethionine sulfoxide	75.0094	1.9743	1.0152e-24	5
YDR461W	MFA1	protein_coding	IV	Mating pheromone a-factor; made by a cells; interacts with alpha cells to induce cell cycle arrest and other responses leading to mating; biogenesis involves C-terminal modification, N-terminal proteolysis, and export; also encoded by MFA2	222.497	1.95753	1.49725e-39	7
YGL117W		protein_coding	VII	Putative protein of unknown function	146.226	1.95601	9.50293e-46	5
YDR034W-B		protein_coding	IV	Predicted tail-anchored plasma membrane protein; contains conserved CYSTM module; related proteins in other organisms may be involved in response to stress; N- and C-terminal fusion proteins localize to the cell periphery; YDR034W-B has a paralog, YBR056W-A, that arose from the whole genome duplication	79.64	1.9287	1.33131e-25	1
YHL048W	COS8	protein_coding	VIII	Endosomal protein involved in turnover of plasma membrane proteins; member of the DUP380 subfamily of conserved, often subtelomeric COS genes; required for the multivesicular vesicle body sorting pathway that internalizes plasma membrane proteins for degradation; Cos proteins provide ubiquitin in trans for nonubiquitinated cargo proteins	426.99	1.86773	4.15893e-32	8
YJR025C	BNA1	protein_coding	X	3-hydroxyanthranilic acid dioxygenase; required for the de novo biosynthesis of NAD from tryptophan via kynurenine; expression regulated by Hst1p	255.528	1.83699	2.18177e-50	5
YNR066C		protein_coding	XIV	Putative membrane-localized protein of unknown function	956.784	1.78683	3.01594e-118	5
YMR303C	ADH2	protein_coding	XIII	Glucose-repressible alcohol dehydrogenase II; catalyzes the conversion of ethanol to acetaldehyde; involved in the production of certain carboxylate esters; regulated by ADR1	55.3096	1.78449	6.58216e-10	5
YCR099C		protein_coding	III	Putative protein of unknown function	103.621	1.78263	1.86827e-24	5
YLR092W	SUL2	protein_coding	XII	High affinity sulfate permease; sulfate uptake is mediated by specific sulfate transporters Sul1p and Sul2p, which control the concentration of endogenous activated sulfate intermediates	120.961	1.77167	4.72118e-16	8
YOR193W	PEX27	protein_coding	XV	Peripheral peroxisomal membrane protein; involved in controlling peroxisome size and number, interacts with Pex25p; PEX27 has a paralog, PEX25, that arose from the whole genome duplication	169.045	1.75091	8.23856e-39	5
YCR100C		protein_coding	III	Putative protein of unknown function	188.416	1.73347	9.62435e-38	5
YNR065C	YNR065C	protein_coding	XIV	Protein of unknown function; protein-protein interactions suggest a possible role in actin patch formation; YNR065C is not an essential gene	2052.15	1.71075	3.8871e-118	5
YBR147W	RTC2	protein_coding	II	Putative vacuolar membrane transporter for cationic amino acids; likely contributes to amino acid homeostasis by exporting cationic amino acids from the vacuole; positive regulation by Lys14p suggests that lysine may be the primary substrate; member of the PQ-loop family, with seven transmembrane domains; similar to mammalian PQLC2 vacuolar transporter; RTC2 has a paralog, YPQ1, that arose from t…	57.5465	1.7075	2.4547e-22	5
YIL160C	POT1	protein_coding	IX	3-ketoacyl-CoA thiolase with broad chain length specificity; cleaves 3-ketoacyl-CoA into acyl-CoA and acetyl-CoA during beta-oxidation of fatty acids	58.2297	1.65443	4.01115e-14	1
YOR302W		protein_coding	XV	CPA1 uORF; Arginine attenuator peptide, regulates translation of the CPA1 mRNA	298.396	1.59832	6.47008e-23	5
YNR057C	BIO4	protein_coding	XIV	Dethiobiotin synthetase; catalyzes the third step in the biotin biosynthesis pathway; BIO4 is in a cluster of 3 genes (BIO3, BIO4, and BIO5) that mediate biotin synthesis; BIO3 and BIO4 were acquired by horizontal gene transfer (HGT) from bacteria; expression appears to be repressed at low iron levels	57.7883	1.59359	1.41167e-12	5
YHR071W	PCL5	protein_coding	VIII	Cyclin; interacts with and phosphorylated by Pho85p cyclin-dependent kinase (Cdk), induced by Gcn4p at level of transcription, specifically required for Gcn4p degradation, may be sensor of cellular protein biosynthetic capacity	985.192	1.58202	3.72485e-97	5
YKL189W	HYM1	protein_coding	XI	Component of the RAM signaling network; is involved in regulation of Ace2p activity and cellular morphogenesis, interacts with Kic1p and Sog2p, localizes to sites of polarized growth during budding and during the mating response	150.113	1.57885	1.61309e-27	5
YMR062C	ARG7	protein_coding	XIII	Mitochondrial ornithine acetyltransferase; catalyzes the fifth step in arginine biosynthesis; also possesses acetylglutamate synthase activity, regenerates acetylglutamate while forming ornithine	749.313	1.56861	1.12295e-51	5
YCR101C		protein_coding	III	Putative protein of unknown function; localizes to the membrane fraction; YCR101C is not an essential gene	138.697	1.56049	6.49069e-24	5
YNL042W	BOP3	protein_coding	XIV	Protein of unknown function; potential Cdc28p substrate; overproduction confers resistance to methylmercury	205.925	1.54432	3.36828e-20	5
YPR005C	HAL1	protein_coding	XVI	Cytoplasmic protein involved in halotolerance; decreases intracellular Na+ (via Ena1p) and increases intracellular K+ by decreasing efflux; expression repressed by Ssn6p-Tup1p and Sko1p and induced by NaCl, KCl, and sorbitol through Gcn4p	317.116	1.53007	8.77367e-59	1
YBL049W	MOH1	protein_coding	II	Protein of unknown function, essential for stationary phase survival; not required for growth on nonfermentable carbon sources; possibly linked with vacuolar transport	66.5821	1.52414	1.42417e-12	6
YPL250C	ATG41	protein_coding	XVI	Protein of unknown function; required for selective and nonselective autophagy, and mitophagy; regulates the rate of autophagosome formation; interacts with Atg9p, and has a similar peri-mitochondrial localization; elevated Gcn4p-dependent expression under autophagy-inducing conditions; mobilized into polysomes upon a shift from a fermentable to nonfermentable carbon source; potential Cdc28p subs…	243.402	1.50744	9.69145e-51	5
YMR198W	CIK1	protein_coding	XIII	Kinesin-associated protein; required for both karyogamy and mitotic spindle organization, interacts stably and specifically with Kar3p and may function to target this kinesin to a specific cellular role; locus encodes a long and short transcript with differing functions; CIK1 has a paralog, VIK1, that arose from the whole genome duplication	273.473	1.48875	1.23735e-43	5
YDL119C	HEM25	protein_coding	IV	Mitochondrial glycine transporter; required for the transport of glycine into mitochondria for initiation of heme biosynthesis, with YMC1 acting as a secondary transporter; homolog of human SLC25A38, a mitochondrial glycine transporter associated with nonsyndromic autosomal recessive congenital sideroblastic anemia; human SLC25A38 can complement the heme deficiency associated with the null mutant…	184.075	1.48471	1.72651e-24	5
YER175C	TMT1	protein_coding	V	Trans-aconitate methyltransferase; cytosolic enzyme that catalyzes the methyl esterification of 3-isopropylmalate, an intermediate of the leucine biosynthetic pathway, and trans-aconitate, which inhibits the citric acid cycle	137.874	1.47678	3.31275e-34	5
YBR256C	RIB5	protein_coding	II	Riboflavin synthase; catalyzes the last step of the riboflavin biosynthesis pathway	387.912	1.4613	4.15193e-46	5
YGL184C	STR3	protein_coding	VII	Peroxisomal cystathionine beta-lyase; converts cystathionine into homocysteine; may be redox regulated by Gto1p; involved in the release of the aromatic thiol 3-mercaptohexanol during wine fermentation	160.976	1.41999	1.55448e-29	5
YGL121C	GPG1	protein_coding	VII	Proposed gamma subunit of the heterotrimeric G protein; interacts with the receptor Gpr1p; involved in regulation of pseudohyphal growth; requires Gpb1p or Gpb2p to interact with Gpa2p; overproduction causes prion curing	52.2948	1.41872	8.26925e-12	6
YKR061W	KTR2	protein_coding	XI	Mannosyltransferase involved in N-linked protein glycosylation; member of the KRE2/MNT1 mannosyltransferase family; KTR2 has a paralog, YUR1, that arose from the whole genome duplication	349.095	1.40717	6.76344e-40	5
YDL127W	PCL2	protein_coding	IV	Cyclin, interacts with cyclin-dependent kinase Pho85p; member of the Pcl1,2-like subfamily, involved in the regulation of polarized growth and morphogenesis and progression through the cell cycle; localizes to sites of polarized cell growth; PCL2 has a paralog, PCL9, that arose from the whole genome duplication	237.384	1.40028	6.88467e-34	5
YJL153C	INO1	protein_coding	X	Inositol-3-phosphate synthase; involved in synthesis of inositol phosphates and inositol-containing phospholipids; transcription is coregulated with other phospholipid biosynthetic genes by Ino2p and Ino4p, which bind the UASINO DNA element	455.528	1.39908	1.09848e-19	5
YOR130C	ORT1	protein_coding	XV	Ornithine transporter of the mitochondrial inner membrane; exports ornithine from mitochondria as part of arginine biosynthesis; functionally complemented by human ortholog, SLC25A15, which is associated with hyperammonaemia-hyperornithinaemia-homocitrullinuria (HHH) syndrome, but HHH-associated variants fail to complement	101.928	1.36427	1.14075e-16	5
YFR030W	MET10	protein_coding	VI	Subunit alpha of assimilatory sulfite reductase; complex converts sulfite into sulfide	2100.2	1.34294	1.03384e-45	5
YIL117C	PRM5	protein_coding	IX	Pheromone-regulated protein, predicted to have 1 transmembrane segment; induced during cell integrity signaling; PRM5 has a paralog, YNL058C, that arose from the whole genome duplication	682.21	1.33178	6.98344e-64	5
YOL155C	HPF1	protein_coding	XV	Haze-protective mannoprotein; reduces the particle size of aggregated proteins in white wines	330.245	1.30179	6.96446e-22	5
YGL125W	MET13	protein_coding	VII	Major isozyme of methylenetetrahydrofolate reductase; catalyzes the reduction of 5,10-methylenetetrahydrofolate to 5-methyltetrahydrofolate in the methionine biosynthesis pathway	1418.46	1.30007	1.04746e-67	5
YPR167C	MET16	protein_coding	XVI	3'-phosphoadenylsulfate reductase; reduces 3'-phosphoadenylyl sulfate to adenosine-3',5'-bisphosphate and free sulfite using reduced thioredoxin as cosubstrate, involved in sulfate assimilation and methionine metabolism	103.118	1.29558	1.29941e-11	5
YBL016W	FUS3	protein_coding	II	Mitogen-activated serine/threonine protein kinase involved in mating; phosphoactivated by Ste7p; substrates include Ste12p, Far1p, Bni1p, Sst2p; inhibits invasive growth during mating by phosphorylating Tec1p, promoting its; inhibits recruitment of Ste5p, Cdc42p-mediated asymmetry and mating morphogenesis	555.273	1.28868	1.00006e-37	5
YHR209W	CRG1	protein_coding	VIII	S-AdoMet-dependent methyltransferase involved in lipid homeostasis; mediates resistance to a drug cantharidin	436.198	1.2851	1.00484e-28	5
YGR032W	GSC2	protein_coding	VII	Catalytic subunit of 1,3-beta-glucan synthase; involved in formation of the inner layer of the spore wall; activity positively regulated by Rho1p and negatively by Smk1p; GSC2 has a paralog, FKS1, that arose from the whole genome duplication	6339.13	1.27429	2.04279e-79	1
YPR002W	PDH1	protein_coding	XVI	Putative 2-methylcitrate dehydratase; mitochondrial protein that participates in respiration; induced by diauxic shift; homologous to E. coli PrpD, may take part in the conversion of 2-methylcitrate to 2-methylisocitrate	176.573	1.26648	5.37158e-21	6
YJR094C	IME1	protein_coding	X	Master regulator of meiosis that is active only during meiotic events; activates transcription of early meiotic genes through interaction with Ume6p; degraded by the 26S proteasome following phosphorylation by Ime2p; transcription is negatively regulated in cis by the IRT1 long noncoding antisense RNA	50.8854	1.24252	2.14262e-11	6
YJR012C		protein_coding	X	Essential protein of unknown function; proposed involvement in transport based on mass spectrometry analysis of copurifying proteins; partially overlaps neighboring ORF, GPI14/YJR013W	60.8084	1.23353	6.04275e-09	5
YKR091W	SRL3	protein_coding	XI	GTB motif (G1/S transcription factor binding) containing protein; binds SBF-regulated promoters in hydroxyurea-treated cells; when overexpressed, suppresses the lethality of a rad53 null mutation; potential Cdc28p substrate; SRL3 has a paralog, WHI5, that arose from the whole genome duplication	313.495	1.21893	2.83225e-23	5
YJR010W	MET3	protein_coding	X	ATP sulfurylase; catalyzes the primary step of intracellular sulfate activation, essential for assimilatory reduction of sulfate to sulfide, involved in methionine metabolism; human homolog PAPSS2 complements yeast null mutant	649.402	1.20543	4.15512e-37	8
YBL078C	ATG8	protein_coding	II	Component of autophagosomes and Cvt vesicles; regulator of Atg1p, targets it to autophagosomes; binds the Atg1p-Atg13p complex, triggering its vacuolar degradation; unique ubiquitin-like protein whose conjugation target is lipid phosphatidylethanolamine (PE); Atg8p-PE is anchored to membranes, is involved in phagophore expansion, and may mediate membrane fusion during autophagosome formation; dec…	113.938	1.19287	3.47889e-10	5
YIR034C	LYS1	protein_coding	IX	Saccharopine dehydrogenase (NAD+, L-lysine-forming); catalyzes the conversion of saccharopine to L-lysine, which is the final step in the lysine biosynthesis pathway; also has mRNA binding activity	570.533	1.19266	1.30424e-47	5
YJL107C		protein_coding	X	Putative protein of unknown function; expression is induced by activation of the HOG1 mitogen-activated signaling pathway and this induction is Hog1p/Pbs2p dependent; YJL107C and adjacent ORF, YJL108C are merged in related fungi	233.541	1.18828	1.04621e-21	5
YIL116W	HIS5	protein_coding	IX	Histidinol-phosphate aminotransferase; catalyzes the seventh step in histidine biosynthesis; responsive to general control of amino acid biosynthesis; mutations cause histidine auxotrophy and sensitivity to Cu, Co, and Ni salts	681.359	1.1853	5.69563e-58	5
YBR093C	PHO5	protein_coding	II	Repressible acid phosphatase; 1 of 3 repressible acid phosphatases that also mediates extracellular nucleotide-derived phosphate hydrolysis; secretory pathway derived cell surface glycoprotein; induced by phosphate starvation and coordinately regulated by PHO4 and PHO2	2405.92	1.17171	1.28163e-22	5
YJR155W	AAD10	protein_coding	X	Putative aryl-alcohol dehydrogenase; similar to P. chrysosporium aryl-alcohol dehydrogenase; mutational analysis has not yet revealed a physiological role; members of the AAD gene family comprise three pairs (AAD3 + AAD15, AAD6/AAD16 + AAD4, AAD10 + AAD14) whose two genes are more related to one another than to other members of the family	83.5224	1.16875	3.07549e-13	5
YJR130C	STR2	protein_coding	X	Cystathionine gamma-synthase, converts cysteine into cystathionine; STR2 has a paralog, YML082W, that arose from the whole genome duplication	340.386	1.16869	5.5539e-31	5
YOR222W	ODC2	protein_coding	XV	Mitochondrial inner membrane transporter; 2-oxodicarboxylate transporter, exports 2-oxoadipate and 2-oxoglutarate from the mitochondrial matrix to the cytosol for use in lysine and glutamate biosynthesis and in lysine catabolism; ODC2 has a paralog, ODC1, that arose from the whole genome duplication	441.274	1.16867	2.57016e-42	5
YBR208C	DUR1,2	protein_coding	II	Urea amidolyase; contains both urea carboxylase and allophanate hydrolase activities, degrades urea to CO2 and NH3; expression sensitive to nitrogen catabolite repression and induced by allophanate, an intermediate in allantoin degradation; protein abundance increases in response to DNA replication stress	2410.88	1.16745	3.9589e-49	5
YLR194C	NCW2	protein_coding	XII	Structural constituent of the cell wall; attached to the plasma membrane by a GPI-anchor; expression is upregulated in response to cell wall stress; null mutant is sensitive to the antifungal agent polyhexamethylene biguanide, resistant to zymolyase treatment and has increased chitin deposition	1522.08	1.15952	8.15207e-42	5
YNL036W	NCE103	protein_coding	XIV	Carbonic anhydrase; metalloenzyme that catalyzes CO2 hydration to bicarbonate, which is an important metabolic substrate, and protons; not expressed under conditions of high CO2, such as inside a growing colony, but transcription is induced in response to low CO2 levels, such as on the colony surface in ambient air; poorly transcribed under aerobic conditions and at an undetectable level under an…	775.645	1.15858	0.000489146	5
YDL234C	GYP7	protein_coding	IV	GTPase-activating protein for yeast Rab family members; members include Ypt7p (most effective), Ypt1p, Ypt31p, and Ypt32p (in vitro); involved in vesicle mediated protein trafficking; contains a PH-like domain	552.316	1.15368	3.124e-38	5
YOR385W		protein_coding	XV	Putative protein of unknown function; green fluorescent protein (GFP)-fusion protein localizes to the cytoplasm; YOR385W is not an essential gene	236.728	1.15261	4.72055e-15	5
YHL035C	VMR1	protein_coding	VIII	Vacuolar membrane protein; involved in multiple drug resistance and metal sensitivity; ATP-binding cassette (ABC) family member involved in drug transport; potential Cdc28p substrate; induced under respiratory conditions; VMR1 has a paralog, YBT1, that arose from the whole genome duplication	1531.78	1.15179	6.79366e-28	5
YIL108W		protein_coding	IX	Putative metalloendopeptidase; forms cytoplasmic foci upon DNA replication stress	1404	1.14567	3.43805e-69	5
YGR146C	ECL1	protein_coding	VII	Protein of unknown function; mitochondrial-dependent role in the extension of chronological lifespan; overexpression increases oxygen consumption and respiratory activity while deletion results in reduced oxygen consumption under conditions of caloric restriction; induced by iron homeostasis transcription factor Aft2p; multicopy suppressor of temperature sensitive hsf1 mutant; induced by treatmen…	831.232	1.13895	3.48142e-32	5
YKL133C		protein_coding	XI	Putative protein of unknown function; not required for growth of cells lacking the mitochondrial genome; SWAT-GFP and mCherry fusion proteins localize to the mitochondria; YKL133C has a paralog, MGR3, that arose from the whole genome duplication	70.9291	1.13845	2.28174e-08	6
YJL157C	FAR1	protein_coding	X	CDK inhibitor and nuclear anchor; during the cell cycle Far1p sequesters the GEF Cdc24p in the nucleus; phosphorylation by Cdc28p-Cln results in SCFCdc4 complex-mediated ubiquitin-dependent degradation, releasing Cdc24p for export and activation of GTPase Cdc42p; in response to pheromone, phosphorylation of Far1p by MAPK Fus3p results in association with, and inhibition of Cdc28p-Cln, as well as …	1130.14	1.13553	7.89794e-28	5
YJR137C	MET5	protein_coding	X	Sulfite reductase beta subunit; involved in amino acid biosynthesis, transcription repressed by methionine	2127.29	1.12551	3.39967e-37	8
YIL015W	BAR1	protein_coding	IX	Aspartyl protease; secreted into the periplasmic space of mating type a cell; helps cells find mating partners; cleaves and inactivates alpha factor allowing cells to recover from alpha-factor-induced cell cycle arrest	1358.81	1.11631	1.40782e-24	7
YLR267W	BOP2	protein_coding	XII	Protein of unknown function	166.162	1.10514	4.42228e-25	1
YJL089W	SIP4	protein_coding	X	C6 zinc cluster transcriptional activator; binds to the carbon source-responsive element (CSRE) of gluconeogenic genes; involved in the positive regulation of gluconeogenesis; regulated by Snf1p protein kinase; localized to the nucleus	107.964	1.09876	7.33633e-08	6
YOR303W	CPA1	protein_coding	XV	Small subunit of carbamoyl phosphate synthetase; carbamoyl phosphate synthetase catalyzes a step in the synthesis of citrulline, an arginine precursor; translationally regulated by an attenuator peptide encoded by YOR302W within the CPA1 mRNA 5'-leader	1505.17	1.08946	3.95296e-34	5
YKR097W	PCK1	protein_coding	XI	Phosphoenolpyruvate carboxykinase; key enzyme in gluconeogenesis, catalyzes early reaction in carbohydrate biosynthesis, glucose represses transcription and accelerates mRNA degradation, regulated by Mcm1p and Cat8p, located in the cytosol	186.343	1.08769	2.95616e-09	1
YJL108C	PRM10	protein_coding	X	Pheromone-regulated protein; proposed to be involved in mating; predicted to have 5 transmembrane segments; induced by treatment with 8-methoxypsoralen and UVA irradiation	186.836	1.08678	1.29212e-16	5
YKR013W	PRY2	protein_coding	XI	Sterol binding protein involved in the export of acetylated sterols; secreted glycoprotein and member of the CAP protein superfamily (cysteine-rich secretory proteins (CRISP), antigen 5, and pathogenesis related 1 proteins); sterol export function is redundant with that of PRY1; may be involved in detoxification of hydrophobic compounds; PRY2 has a paralog, PRY1, that arose from the whole genome …	4101.99	1.08013	2.46777e-40	5
YMR170C	ALD2	protein_coding	XIII	Cytoplasmic aldehyde dehydrogenase; involved in ethanol oxidation and beta-alanine biosynthesis; uses NAD+ as the preferred coenzyme; expression is stress induced and glucose repressed; very similar to Ald3p	152.257	1.07758	5.47209e-20	5
YIR017C	MET28	protein_coding	IX	bZIP transcriptional activator in the Cbf1p-Met4p-Met28p complex; participates in the regulation of sulfur metabolism	82.3239	1.07278	4.06535e-09	5
YDL198C	GGC1	protein_coding	IV	Mitochondrial GTP/GDP transporter; essential for mitochondrial genome maintenance; has a role in mitochondrial iron transport; member of the mitochondrial carrier family	1092.73	1.0708	2.68971e-40	5
YPL088W		protein_coding	XVI	Putative aryl alcohol dehydrogenase; transcription is activated by paralogous transcription factors Yrm1p and Yrr1p along with genes involved in multidrug resistance	319.926	1.03903	1.01195e-24	5
YHR138C		protein_coding	VIII	Protein of unknown function; similar to Pbi2p; double null mutant lacking Pbi2p and Yhr138cp exhibits highly fragmented vacuoles; protein abundance increases in response to DNA replication stress	181.279	1.02157	1.81498e-15	6
YJR009C	TDH2	protein_coding	X	Glyceraldehyde-3-phosphate dehydrogenase (GAPDH), isozyme 2; involved in glycolysis and gluconeogenesis; tetramer that catalyzes reaction of glyceraldehyde-3-phosphate to 1,3 bis-phosphoglycerate; detected in cytoplasm and cell wall; protein abundance increases in response to DNA replication stress; GAPDH-derived antimicrobial peptides are active against a wide variety of wine-related yeasts and …	18917.6	1.01574	4.83283e-36	5
YKL163W	PIR3	protein_coding	XI	O-glycosylated covalently-bound cell wall protein; required for cell wall stability; expression is cell cycle regulated, peaking in M/G1 and also subject to regulation by the cell integrity pathway; coding sequence contains length polymorphisms in different strains; PIR3 has a paralog, HSP150, that arose from the whole genome duplication	1633.22	1.00883	1.22249e-36	2
YIL023C	YKE4	protein_coding	IX	Zinc transporter; localizes to the ER; null mutant is sensitive to calcofluor white, leads to zinc accumulation in cytosol; ortholog of the mouse KE4 and member of the ZIP (ZRT, IRT-like Protein) family	887.526	1.00845	7.05312e-33	5
YJR154W		protein_coding	X	Putative protein of unknown function; green fluorescent protein (GFP)-fusion protein localizes to the cytoplasm	124.996	1.00771	1.15437e-11	6
YPR160W	GPH1	protein_coding	XVI	Glycogen phosphorylase required for the mobilization of glycogen; non-essential; regulated by cyclic AMP-mediated phosphorylation; phosphorylation by Cdc28p may coordinately regulate carbohydrate metabolism and the cell cycle; expression is regulated by stress-response elements and by the HOG MAP kinase pathway	3229.52	1.00568	1.43756e-16	2
YEL040W	UTR2	protein_coding	V	Chitin transglycosylase; functions in the transfer of chitin to beta(1-6) and beta(1-3) glucans in the cell wall; similar to and functionally redundant with Crh1; glycosylphosphatidylinositol (GPI)-anchored protein localized to bud neck	5966.46	-1.01066	6.77016e-45	8
YBL002W	HTB2	protein_coding	II	Histone H2B; core histone protein required for chromatin assembly and chromosome function; nearly identical to HTB1; Rad6p-Bre1p-Lge1p mediated ubiquitination regulates reassembly after DNA replication, transcriptional activation, meiotic DSB formation and H3 methylation	2289.68	-1.02096	9.91536e-18	8
YLR214W	FRE1	protein_coding	XII	Ferric reductase and cupric reductase; reduces siderophore-bound iron and oxidized copper prior to uptake by transporters; expression induced by low copper and iron levels	1290.73	-1.0377	0.000477341	8
YPR124W	CTR1	protein_coding	XVI	High-affinity copper transporter of plasma membrane; mediates nearly all copper uptake under low copper conditions; transcriptionally induced at low copper levels and degraded at high copper levels; protein increases in abundance and relocalizes from nucleus to plasma membrane upon DNA replication stress; human homolog SLC31A1 can complement a yeast ctr1 ctr3 double deletion	709.387	-1.05516	0.00434293	6
YPR192W	AQY1	protein_coding	XVI	Spore-specific water channel; mediates the transport of water across cell membranes, developmentally controlled; may play a role in spore maturation, probably by allowing water outflow, may be involved in freeze tolerance	133.81	-1.26355	1.44307e-08	2
YOR384W	FRE5	protein_coding	XV	Putative ferric reductase with similarity to Fre2p; expression induced by low iron levels; the authentic, non-tagged protein is detected in highly purified mitochondria in high-throughput studies	91.2033	-1.29755	0.00151475	1
YCL064C	CHA1	protein_coding	III	Catabolic L-serine (L-threonine) deaminase; catalyzes the degradation of both L-serine and L-threonine; required to use serine or threonine as the sole nitrogen source, transcriptionally induced by serine and threonine	694.089	-1.32363	8.38762e-33	8
YPL265W	DIP5	protein_coding	XVI	Dicarboxylic amino acid permease; mediates high-affinity and high-capacity transport of L-glutamate and L-aspartate; also a transporter for Gln, Asn, Ser, Ala, and Gly; relocalizes from plasma membrane to vacuole upon DNA replication stress	1288.92	-2.26554	2.84897e-121	8
YCR097W	HMRA1	protein_coding	III	Silenced copy of a1 at HMR; homeobox corepressor that interacts with Alpha2p to repress haploid-specific gene transcription in diploid cells	70.3999	-3.70455	5.0941e-11	8
